# Supplementary material for: Copper-catalyzed synthesis of pyrazolo[5,1-a]isoquinoline derivatives from 2-gem-dipyrazolylvinylbromobenzenes
Source: Royal Society of Chemistry journal article supplement (doi:10.1039/c9nj01882d), 2019-01-01

Support Information for

**Copper-catalyzed synthesis of pyrazolyl pyrazolo[5,1-*a*]isoquinoline derivatives from 2-*gem*-dipyrazolylvinylbromobenzenes**

Wan Qiu Zhao, Kun Qian, Cheng Wu Su, Lei Shao, Dong-Mei Cui, Chen Zhang and Xiu-Li Wang

**Experimental Section**

**General Information.** Under otherwise noted, materials were obtained from commercial suppliers and used without further purification. Thin layer chromatography (TLC) was performed using silica gel 60 F<sub>254</sub> and visualized using UV light. Column chromatography was performed with silica gel (mesh 300-400). <sup>1</sup>H NMR and <sup>13</sup>C NMR spectra were recorded on a Bruker Avance 500 MHz spectrometer in CDCl<sub>3</sub> with Me<sub>4</sub>Si as an internal standard. Data were reported as follows: chemical shift in ppm ( $\delta$ ), multiplicity (s = singlet, d = doublet, t = triplet, q = quartet, br = broad and m = multiplet), coupling constant in Hertz (Hz) and integration. IR spectra were recorded on an FT-IR spectrometer, and only major peaks are reported in cm<sup>-1</sup>. HRMS and mass data were recorded by ESI on a TOF mass spectrometer.

**General procedure for the synthesis of pyrazolyl pyrazolo[5,1-*a*]isoquinoline.** To a mixture of 1,1-dipyrazolyl alkene (0.5 mmol), L-Threonine (20 mol%) and NaOH (2.0 eq.) in DMSO (5 mL) was added CuCl (10 mol%). The resulting mixture was stirred at 90°C under N<sub>2</sub>. After completion, the reaction mixture was cooled to room temperature, added water and extracted with CH<sub>2</sub>Cl<sub>2</sub> (3×15 mL). The organic phase was dried over anhydrous Na<sub>2</sub>SO<sub>4</sub>. The mixture was evaporated under vacuum, and the residue was purified by flash chromatography with petroleum ether and ethyl acetate as the eluent to give the pure product.

**5-(1*H*-pyrazol-1-yl)pyrazolo[5,1-*a*]isoquinoline (2a).**

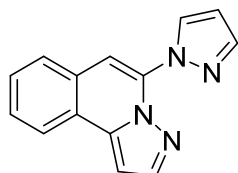

Yellow solid, 92% yield; mp 109.4-110.7 °C; IR (KBr, cm<sup>-1</sup>) 1638, 1616, 1445, 1384, 1096, 905, 744; <sup>1</sup>H NMR (500 MHz, CDCl<sub>3</sub>)  $\delta$  8.81 (d,  $J$  = 2.6 Hz, 1H), 8.14-8.16 (m, 1H), 8.07 (d,  $J$  = 2.2 Hz, 1H), 7.87 (d,  $J$  = 1.5 Hz, 1H), 7.82-7.79 (m, 1H), 7.62-7.58 (m, 2H), 7.50 (s, 1H), 7.15 (d,  $J$  = 2.2 Hz, 1H), 6.60 (dd,  $J$  = 2.6, 1.5 Hz, 1H); <sup>13</sup>C NMR (125 MHz, CDCl<sub>3</sub>)  $\delta$  141.7,

141.3, 140.3, 133.8, 132.6, 128.9, 128.4, 127.5, 127.4, 123.5, 123.0, 107.3, 105.3, 98.5.

HRMS (ESI)  $m/z$   $[M+H]^+$  Calcd for  $C_{14}H_{11}N_4$  235.0984, found 235.0985.

**8-methoxy-5-(1H-pyrazol-1-yl)pyrazolo[5,1-a]isoquinoline (2b).**

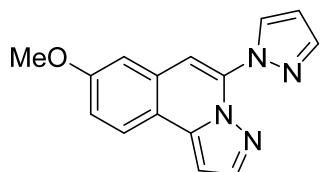

White solid, yield: 62%; mp 112.6-113.7 °C; IR (KBr,  $cm^{-1}$ ) 1649, 1616, 1453, 1234, 1097, 867, 734;  $^1H$  NMR (500 MHz,  $CDCl_3$ )  $\delta$  8.85 (d,  $J = 2.6$  Hz, 1H), 8.03 (d,  $J = 8.8$  Hz, 1H), 8.02 (d,  $J = 2.1$  Hz, 1H), 7.86 (d,  $J = 1.6$  Hz, 1H), 7.43 (s, 1H), 7.19 (dd,  $J = 8.8, 2.5$  Hz, 1H), 7.16 (d,  $J = 2.5$  Hz, 1H), 7.00 (d,  $J = 2.1$  Hz, 1H), 6.59 (dd,  $J = 2.6, 1.6$  Hz, 1H), 3.93 (s, 3H);  $^{13}C$  NMR (125 MHz,  $CDCl_3$ )  $\delta$  159.6, 141.7, 141.4, 140.4, 134.1, 132.6, 130.6, 125.1, 117.5, 117.2, 108.2, 107.3, 104.8, 97.3, 55.5. HRMS (ESI)  $m/z$   $[M+H]^+$  Calcd for  $C_{15}H_{13}N_4O$  265.1089, found 265.1091.

**8,9-dimethoxy-5-(1H-pyrazol-1-yl)pyrazolo[5,1-a]isoquinoline (2c).**

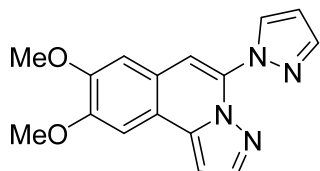

Yellow solid, yield 64%; mp 196.5-198.2 °C; IR (KBr,  $cm^{-1}$ ) 1638, 1616, 1384, 1162, 1090, 638;  $^1H$  NMR (500 MHz,  $CDCl_3$ )  $\delta$  8.75 (d,  $J = 2.5$  Hz, 1H), 8.02 (d,  $J = 2.1$  Hz, 1H), 7.85 (d,  $J = 1.4$  Hz, 1H), 7.43 (s, 1H), 7.39 (s, 1H), 7.14 (s, 1H), 6.98 (d,  $J = 2.1$  Hz, 1H), 6.58 (dd,  $J = 2.5, 1.4$  Hz, 1H), 4.07 (s, 3H), 4.01 (s, 3H);  $^{13}C$  NMR (125 MHz,  $CDCl_3$ )  $\delta$  150.4, 149.9, 141.5, 141.2, 139.9, 132.6, 132.4, 123.6, 117.5, 107.6, 107.1, 105.1, 104.1, 96.9, 56.1, 56.0. HRMS (ESI)  $m/z$   $[M+H]^+$  Calcd for  $C_{16}H_{15}N_4O_2$  295.1195, found 295.1193.

**7,8-dimethoxy-5-(1H-pyrazol-1-yl)pyrazolo[5,1-a]isoquinoline (2d).**

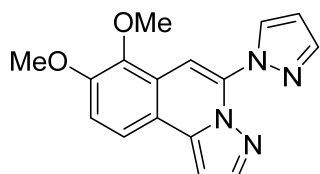

Yellow solid, yield 60%; mp 118 °C; IR (KBr,  $cm^{-1}$ ) 1638, 1487, 1086, 1276, 762;  $^1H$  NMR (500 MHz,  $CDCl_3$ )  $\delta$  8.67 (d,  $J = 2.5$  Hz, 1H), 8.00 (d,  $J = 2.1$  Hz, 1H), 7.88 (d,  $J = 1.5$  Hz, 1H), 7.86 (d,  $J = 8.8$  Hz, 1H), 7.72 (s, 1H), 7.27 (d,  $J = 8.8$  Hz, 1H), 7.01 (d,  $J = 2.1$  Hz, 1H), 6.58 (dd,  $J = 2.5, 1.5$  Hz, 1H), 4.01 (s, 3H), 4.00 (s, 3H);  $^{13}C$  NMR (125 MHz,  $CDCl_3$ )  $\delta$  151.4, 144.0, 141.8, 141.4, 140.2, 134.0, 132.6, 124.6, 119.5, 118.0, 114.2, 107.3, 100.3, 97.9, 61.4, 56.4. HRMS (ESI)  $m/z$   $[M+H]^+$  Calcd for  $C_{16}H_{15}N_4O_2$  295.1195, found 295.1195.

**9,10-dimethoxy-5-(1H-pyrazol-1-yl)pyrazolo[5,1-a]isoquinoline (2e).**

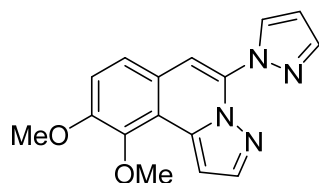

White solid, yield 61%; mp 110-111 °C; IR (KBr,  $\text{cm}^{-1}$ ) 1637, 1080, 617;  $^1\text{H}$  NMR (500 MHz,  $\text{CDCl}_3$ )  $\delta$  8.66 (d,  $J = 2.5$  Hz, 1H), 8.06 (d,  $J = 2.1$  Hz, 1H), 7.85 (d,  $J = 1.5$  Hz, 1H), 7.52 (d,  $J = 8.7$  Hz, 1H), 7.48 (d,  $J = 2.1$  Hz, 1H), 7.35 (s, 1H), 7.27 (d,  $J = 8.7$  Hz, 1H) 6.58 (dd,  $J = 2.5, 1.5$  Hz 1H), 4.06 (s, 3H), 4.02 (s, 3H);  $^{13}\text{C}$  NMR (125 MHz,  $\text{CDCl}_3$ )  $\delta$  151.5, 144.0, 141.5, 141.3, 136.7, 132.6, 132.4, 123.8, 123.4, 118.7, 114.4, 107.1, 105.7, 103.3, 60.0, 56.4. HRMS (ESI)  $m/z$   $[\text{M}+\text{H}]^+$  Calcd for  $\text{C}_{16}\text{H}_{15}\text{N}_4\text{O}_2$  295.1195, found 295.1196.

**5-(1H-pyrazol-1-yl)-[1,3]dioxolo[4,5-g]pyrazolo[5,1-a]isoquinoline (2f).**

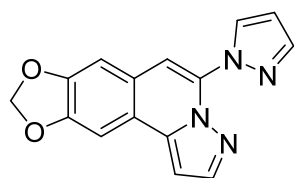

Yellow solid, yield 63%; mp 183.5-185.7 °C; IR (KBr,  $\text{cm}^{-1}$ ) 1637, 1617, 1384, 1160, 938;  $^1\text{H}$  NMR (500 MHz,  $\text{CDCl}_3$ )  $\delta$  8.77 (d,  $J = 2.5$  Hz, 1H), 8.00 (d,  $J = 2.2$  Hz, 1H), 7.84 (d,  $J = 1.5$  Hz, 1H), 7.40 (s, 1H), 7.34 (s, 1H), 7.08 (s, 1H), 6.92 (d,  $J = 2.2$  Hz, 1H), 6.58 (dd,  $J = 2.5, 1.5$  Hz, 1H), 6.08 (s, 2H);  $^{13}\text{C}$  NMR (125 MHz,  $\text{CDCl}_3$ )  $\delta$  148.9, 148.4, 141.6, 141.2, 140.1, 132.7, 132.5, 124.9, 118.8, 107.2, 105.2, 101.8, 101.7, 97.2. HRMS (ESI)  $m/z$   $[\text{M}+\text{H}]^+$  Calcd for  $\text{C}_{15}\text{H}_{11}\text{N}_4\text{O}_2$  279.0882, found 279.0885.

**9-fluoro-5-(1H-pyrazol-1-yl)pyrazolo[5,1-a]isoquinoline (2g).**

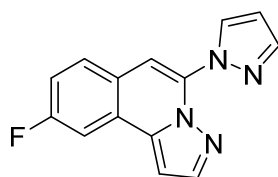

White solid, yield 70%; mp 158.4-159.9 °C; IR (KBr,  $\text{cm}^{-1}$ ) 1637, 1617, 1384, 1092, 855;  $^1\text{H}$  NMR (500 MHz,  $\text{CDCl}_3$ )  $\delta$  8.79 (d,  $J = 2.5$  Hz, 1H), 8.06 (d,  $J = 2.1$  Hz, 1H), 7.86 (d,  $J = 1.4$  Hz, 1H), 7.77-7.74 (m, 2H), 7.46 (s, 1H), 7.33-7.29 (m, 1H), 7.09 (d,  $J = 2.1$  Hz, 1H), 6.60 (dd,  $J = 2.5, 1.4$  Hz, 1H);  $^{13}\text{C}$  NMR (125 MHz,  $\text{CDCl}_3$ )  $\delta$  161.69 (d,  $J = 248.6$  Hz), 141.8, 141.3, 139.53 (d,  $J = 4.4$  Hz), 132.3, 132.6, 129.75 (d,  $J = 8.7$  Hz), 125.42 (d,  $J = 1.8$  Hz), 124.31 (d,  $J = 9.6$  Hz), 117.27 (d,  $J = 23.6$  Hz), 108.89 (d,  $J = 23.1$  Hz), 107.4, 104.7, 99.1. HRMS (ESI)  $m/z$   $[\text{M}+\text{H}]^+$  Calcd for  $\text{C}_{14}\text{H}_{10}\text{FN}_4$  253.0889, found 253.0888.

**8-fluoro-5-(1H-pyrazol-1-yl)pyrazolo[5,1-a]isoquinoline (2h).**

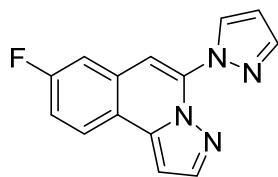

White solid, yield: 65%; mp 178.9-180.0 °C; IR (KBr,  $\text{cm}^{-1}$ ) 1638, 1617, 1449, 1384, 1096, 874, 745;  $^1\text{H}$  NMR (500 MHz,  $\text{CDCl}_3$ )  $\delta$  8.91 (d,  $J = 2.5$  Hz, 1H), 8.10 (dd,  $J = 8.8, 5.3$  Hz, 1H), 8.06 (d,  $J = 2.1$  Hz, 1H), 7.87 (d,  $J = 1.3$  Hz, 1H), 7.45 (s, 1H), 7.42 (dd,  $J = 9.2, 2.4$  Hz, 1H), 7.30 (td,  $J = 8.8, 2.4$  Hz, 1H), 7.07 (d,  $J = 2.1$  Hz, 1H), 6.60 (dd,  $J = 2.5, 1.3$  Hz, 1H);  $^{13}\text{C}$  NMR (125 MHz,  $\text{CDCl}_3$ )  $\delta$  162.3 (d,  $J = 247.1$  Hz), 141.9, 141.5, 140.0, 134.6, 132.7, 130.7 (d,  $J = 9.4$  Hz), 125.8 (d,  $J = 9.1$  Hz), 119.5 (d,  $J = 2.0$  Hz), 116.2 (d,  $J = 24.0$  Hz), 112.2 (d,  $J = 21.9$  Hz), 107.5, 104.0 (d,  $J = 3.4$  Hz), 98.2. HRMS (ESI)  $m/z$   $[\text{M}+\text{H}]^+$  Calcd for  $\text{C}_{14}\text{H}_{10}\text{FN}_4$  253.0889, found 253.0886

**8-chloro-5-(1H-pyrazol-1-yl)pyrazolo[5,1-a]isoquinoline (2i).**

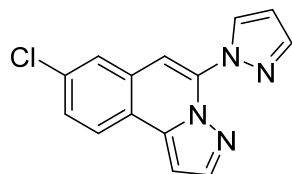

Yellow solid, yield 98%; mp 200.7-202.3 °C; IR (KBr,  $\text{cm}^{-1}$ ) 1649, 1617, 1555, 1443, 1382, 1090, 917, 746;  $^1\text{H}$  NMR (500 MHz,  $\text{CDCl}_3$ )  $\delta$  8.91 (s, 1H), 8.07 (d,  $J = 1.2$  Hz, 1H), 8.04 (d,  $J = 8.6$  Hz, 1H), 7.88 (s, 1H), 7.75 (d,  $J = 2.0$  Hz, 1H), 7.52 (dd,  $J = 8.6, 2.0$  Hz, 1H), 7.43 (s, 1H), 7.11 (d,  $J = 1.2$  Hz, 1H), 6.61 (s, 1H);  $^{13}\text{C}$  NMR (125 MHz,  $\text{CDCl}_3$ )  $\delta$  142.0, 141.6, 139.9, 134.7, 134.3, 132.8, 130.2, 127.9, 126.5, 125.0, 121.2, 107.6, 103.7, 98.8. HRMS (ESI)  $m/z$   $[\text{M}+\text{H}]^+$  Calcd for  $\text{C}_{14}\text{H}_{10}\text{ClN}_4$  269.0594, found 269.0589.

**8-nitro-5-(1H-pyrazol-1-yl)pyrazolo[5,1-a]isoquinoline (2j).**

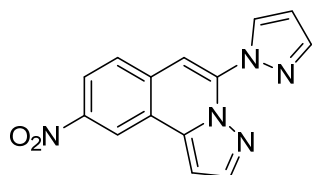

Yellow solid, yield 55%; mp 202-204 °C; IR (KBr,  $\text{cm}^{-1}$ ) 1635, 1384, 1084;  $^1\text{H}$  NMR (500 MHz,  $\text{CDCl}_3$ )  $\delta$  8.99 (d,  $J = 2.6$  Hz, 1H), 8.71 (d,  $J = 2.1$  Hz, 1H), 8.39 (dd,  $J = 8.8, 2.2$  Hz, 1H), 8.28 (d,  $J = 8.8$  Hz, 1H), 8.18 (d,  $J = 2.2$  Hz, 1H), 7.91 (d,  $J = 1.4$  Hz, 1H), 7.69 (s, 1H), 7.32 (d,  $J = 2.1$  Hz, 1H), 6.64 (dd,  $J = 2.6, 1.4$  Hz, 1H);  $^{13}\text{C}$  NMR (125 MHz,  $\text{CDCl}_3$ )  $\delta$  142.4, 142.0, 139.3, 135.5, 132.9, 129.2, 126.5, 124.8, 123.1, 121.5, 118.2, 108.0, 104.0, 100.9. HRMS (ESI)  $m/z$   $[\text{M}+\text{H}]^+$  Calcd for  $\text{C}_{14}\text{H}_{10}\text{N}_5\text{O}_2$  280.0834, found 280.0836.

**8-methoxy-1-methyl-5-(4-methyl-1H-pyrazol-1-yl)pyrazolo[5,1-a]isoquinoline (2k).**

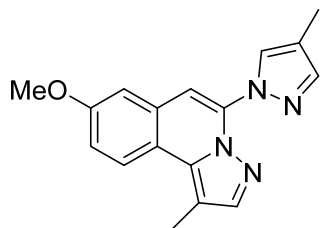

Yellow solid, yield: 71%; mp 112 °C; IR (KBr,  $\text{cm}^{-1}$ ) 1638, 1615, 1384, 1104, 607;  $^1\text{H}$  NMR (500 MHz,  $\text{CDCl}_3$ )  $\delta$  8.53 (s, 1H), 8.19 (d,  $J = 8.8$  Hz, 1H), 7.83 (s, 1H), 7.66 (s, 1H), 7.29 (s, 1H), 7.18 (dd,  $J = 8.8, 2.6$  Hz, 1H), 7.16 (d,  $J = 2.6$  Hz, 1H), 3.92 (s, 3H), 2.63 (s, 3H), 2.23 (s, 3H);  $^{13}\text{C}$  NMR (125 MHz,  $\text{CDCl}_3$ ):  $\delta$  158.8, 142.6, 142.5, 136.4, 134.4, 131.0, 130.8, 124.7, 118.7, 117.7, 116.6, 109.2, 108.6, 104.2, 55.4, 11.6, 9.1. HRMS (ESI)  $m/z$   $[\text{M}+\text{H}]^+$  Calcd for  $\text{C}_{17}\text{H}_{17}\text{N}_4\text{O}$  293.1402, found 293.1401.

**8-fluoro-1-methyl-5-(4-methyl-1H-pyrazol-1-yl)pyrazolo[5,1-a]isoquinoline (2l).**

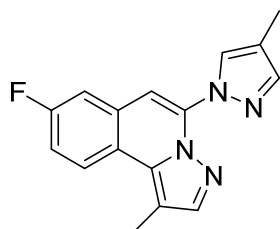

White solid, yield 63%; mp 135-136 °C; IR (KBr,  $\text{cm}^{-1}$ ) 1638, 1618, 1454, 1149, 966, 799;  $^1\text{H}$  NMR (500 MHz,  $\text{CDCl}_3$ )  $\delta$  8.57 (s, 1H), 8.19 (dd,  $J = 9.0, 5.4$  Hz, 1H), 7.84 (s, 1H), 7.65 (s, 1H), 7.37 (dd,  $J = 9.0, 2.6$  Hz, 1H), 7.29-7.24 (m, 2H), 2.60 (s, 3H), 2.22 (s, 3H);  $^{13}\text{C}$  NMR (125 MHz,  $\text{CDCl}_3$ ):  $\delta$  161.2 (d,  $J = 246.3$  Hz), 142.8, 142.6, 135.8, 134.8, 131.1 (d,  $J = 9.3$  Hz), 130.9, 125.2 (d,  $J = 8.6$  Hz), 120.9 (d,  $J = 2.0$  Hz), 117.9, 115.4 (d,  $J = 23.2$  Hz), 112.1 (d,  $J = 21.8$  Hz), 110.1, 103.2 (d,  $J = 3.3$  Hz), 11.6, 9.0. HRMS (ESI)  $m/z$   $[\text{M}+\text{H}]^+$  Calcd for  $\text{C}_{16}\text{H}_{14}\text{FN}_4$  281.1202, found 281.1204

**8-chloro-1-methyl-5-(4-methyl-1H-pyrazol-1-yl)pyrazolo[5,1-a]isoquinoline (2m).**

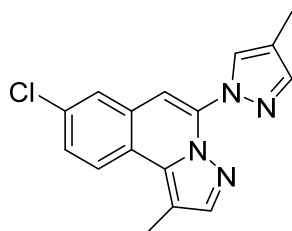

White solid, yield 67%; mp 155-156 °C; IR (KBr,  $\text{cm}^{-1}$ ) 1637, 1617, 1384, 1091, 922, 616;  $^1\text{H}$  NMR (500 MHz,  $\text{CDCl}_3$ )  $\delta$  8.56 (s, 1H), 8.18 (d,  $J = 8.7$  Hz, 1H), 7.88 (s, 1H), 7.72 (d,  $J = 2.2$  Hz, 1H), 7.67 (s, 1H), 7.51 (dd,  $J = 8.7, 2.2$  Hz, 1H), 7.28 (s, 1H), 2.64 (s, 3H), 2.23 (s, 3H);  $^{13}\text{C}$  NMR (125 MHz,  $\text{CDCl}_3$ )  $\delta$  143.0, 142.7, 135.8, 134.8, 133.4, 130.9, 130.6, 127.4, 126.4, 124.5, 122.7, 118.0, 110.9, 103.2, 11.7, 9.1. HRMS (ESI)  $m/z$   $[\text{M}+\text{H}]^+$  Calcd for  $\text{C}_{16}\text{H}_{14}\text{ClN}_4$  297.0907, found 297.0909.

151009  
qk20151006 CDC13

8.8191  
8.8140  
8.0796  
8.0753  
7.8801  
7.8771  
7.6128  
7.6084  
7.6011  
7.5938  
7.5031  
7.2768  
7.1586  
7.1543  
6.6131  
6.6084  
6.6044

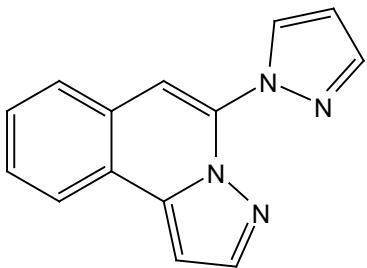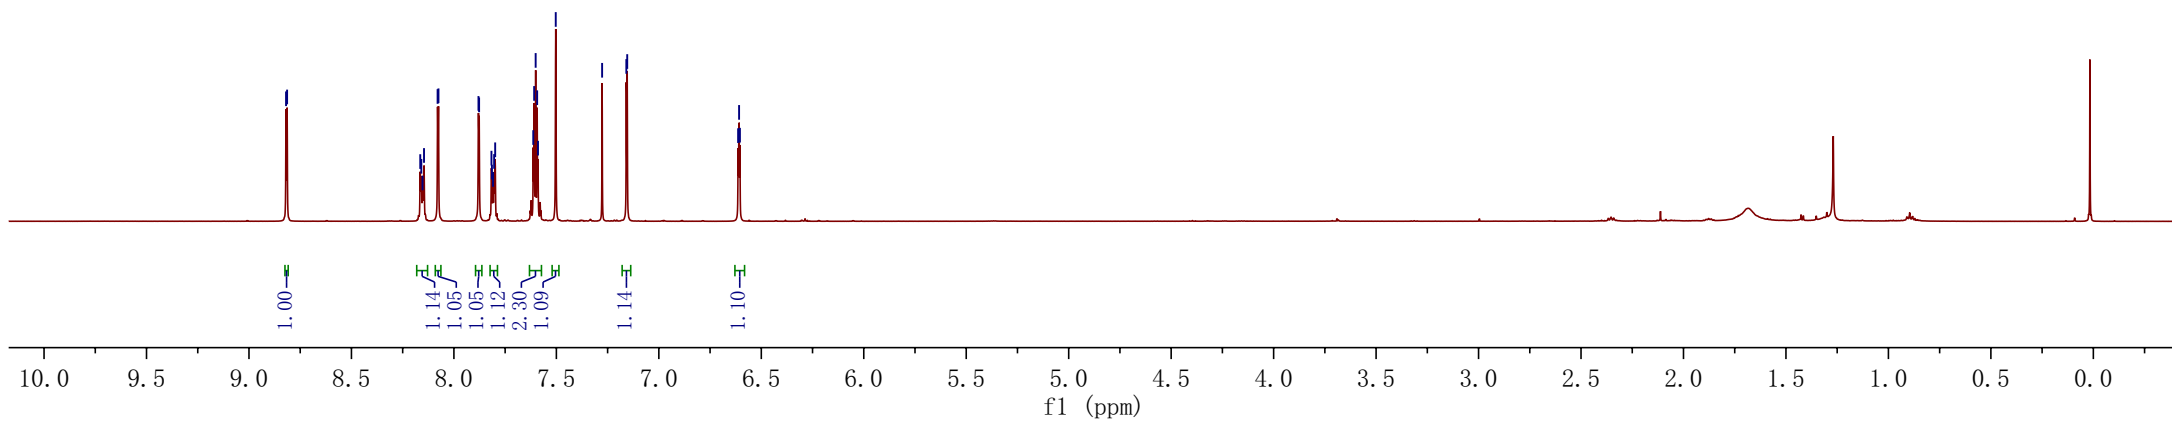

151010  
qk20151006 CDC13

141.7087  
141.2603  
140.3035  
133.7757  
132.5918  
128.9012  
128.3905  
127.5358  
127.4701  
123.4862  
123.0486  
  
107.3058  
105.2828  
  
98.5257  
  
77.2863  
77.0332  
76.7779

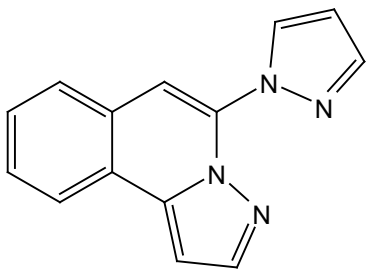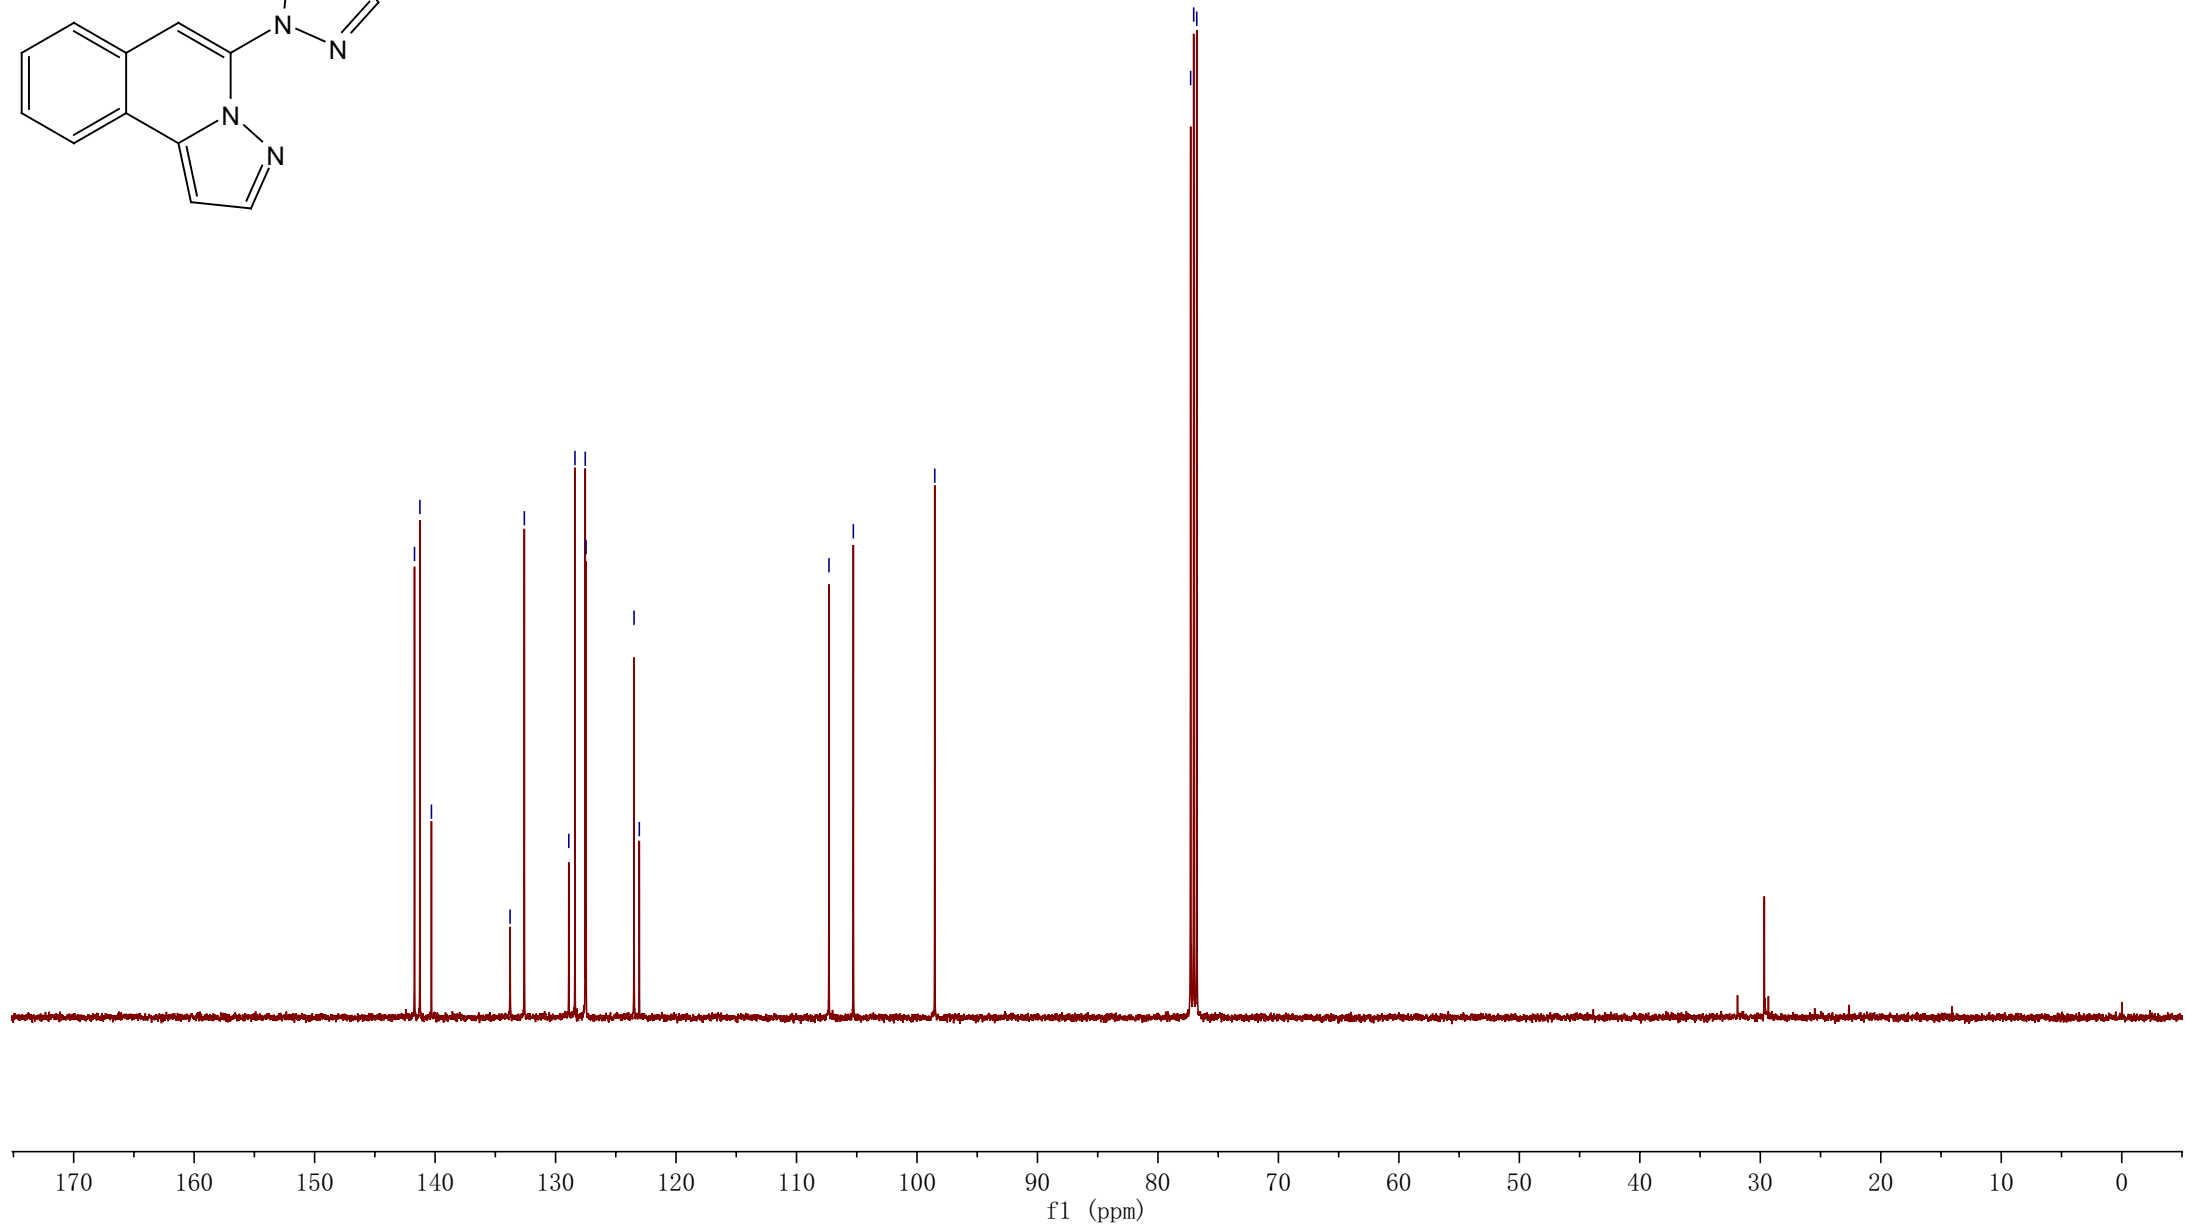

161121  
qk20161117 CDC13

1121  
8.8553  
8.8502

8.0381  
8.0273  
8.0226  
7.8643  
7.8611

7.4289  
7.1631  
7.1582  
7.0055  
6.9987  
6.5947  
6.5901

3.9300

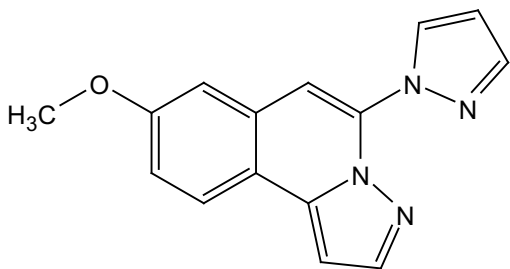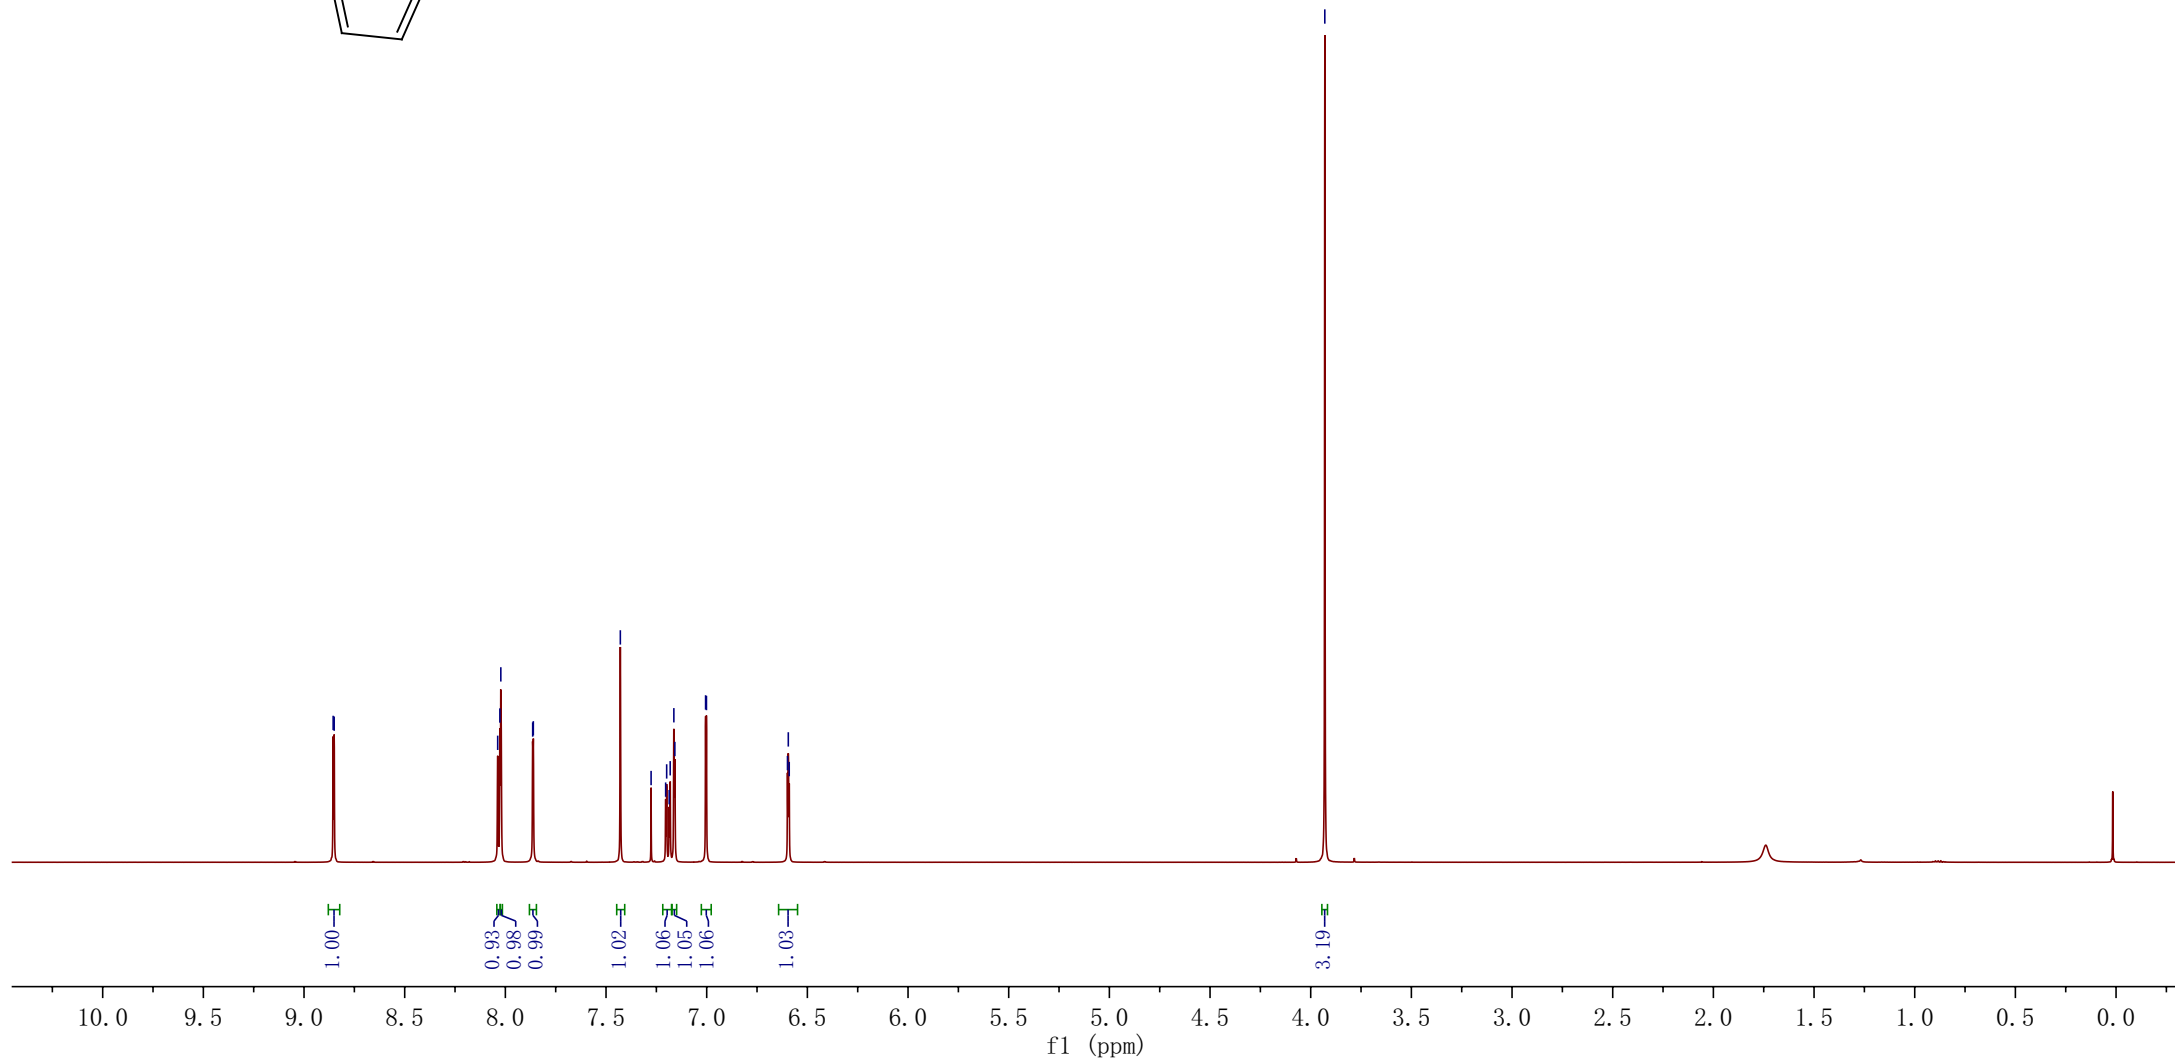



161123  
qk20161117 CDC13 1123

—159.6341  
└─141.7006  
└─141.4065  
└─140.4345  
└─134.1497  
└─132.6214  
└─130.6132  
—125.1188  
└─117.4706  
└─117.1754  
└─108.2398  
└─107.3161  
└─104.8522  
—97.2850  
└─77.2904  
└─77.0353  
└─76.7810  
—55.4613

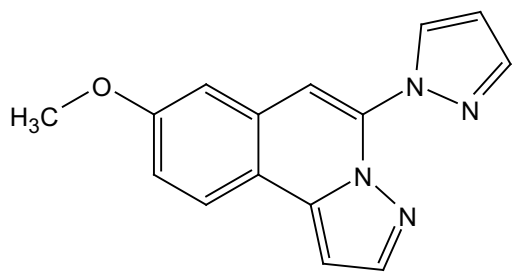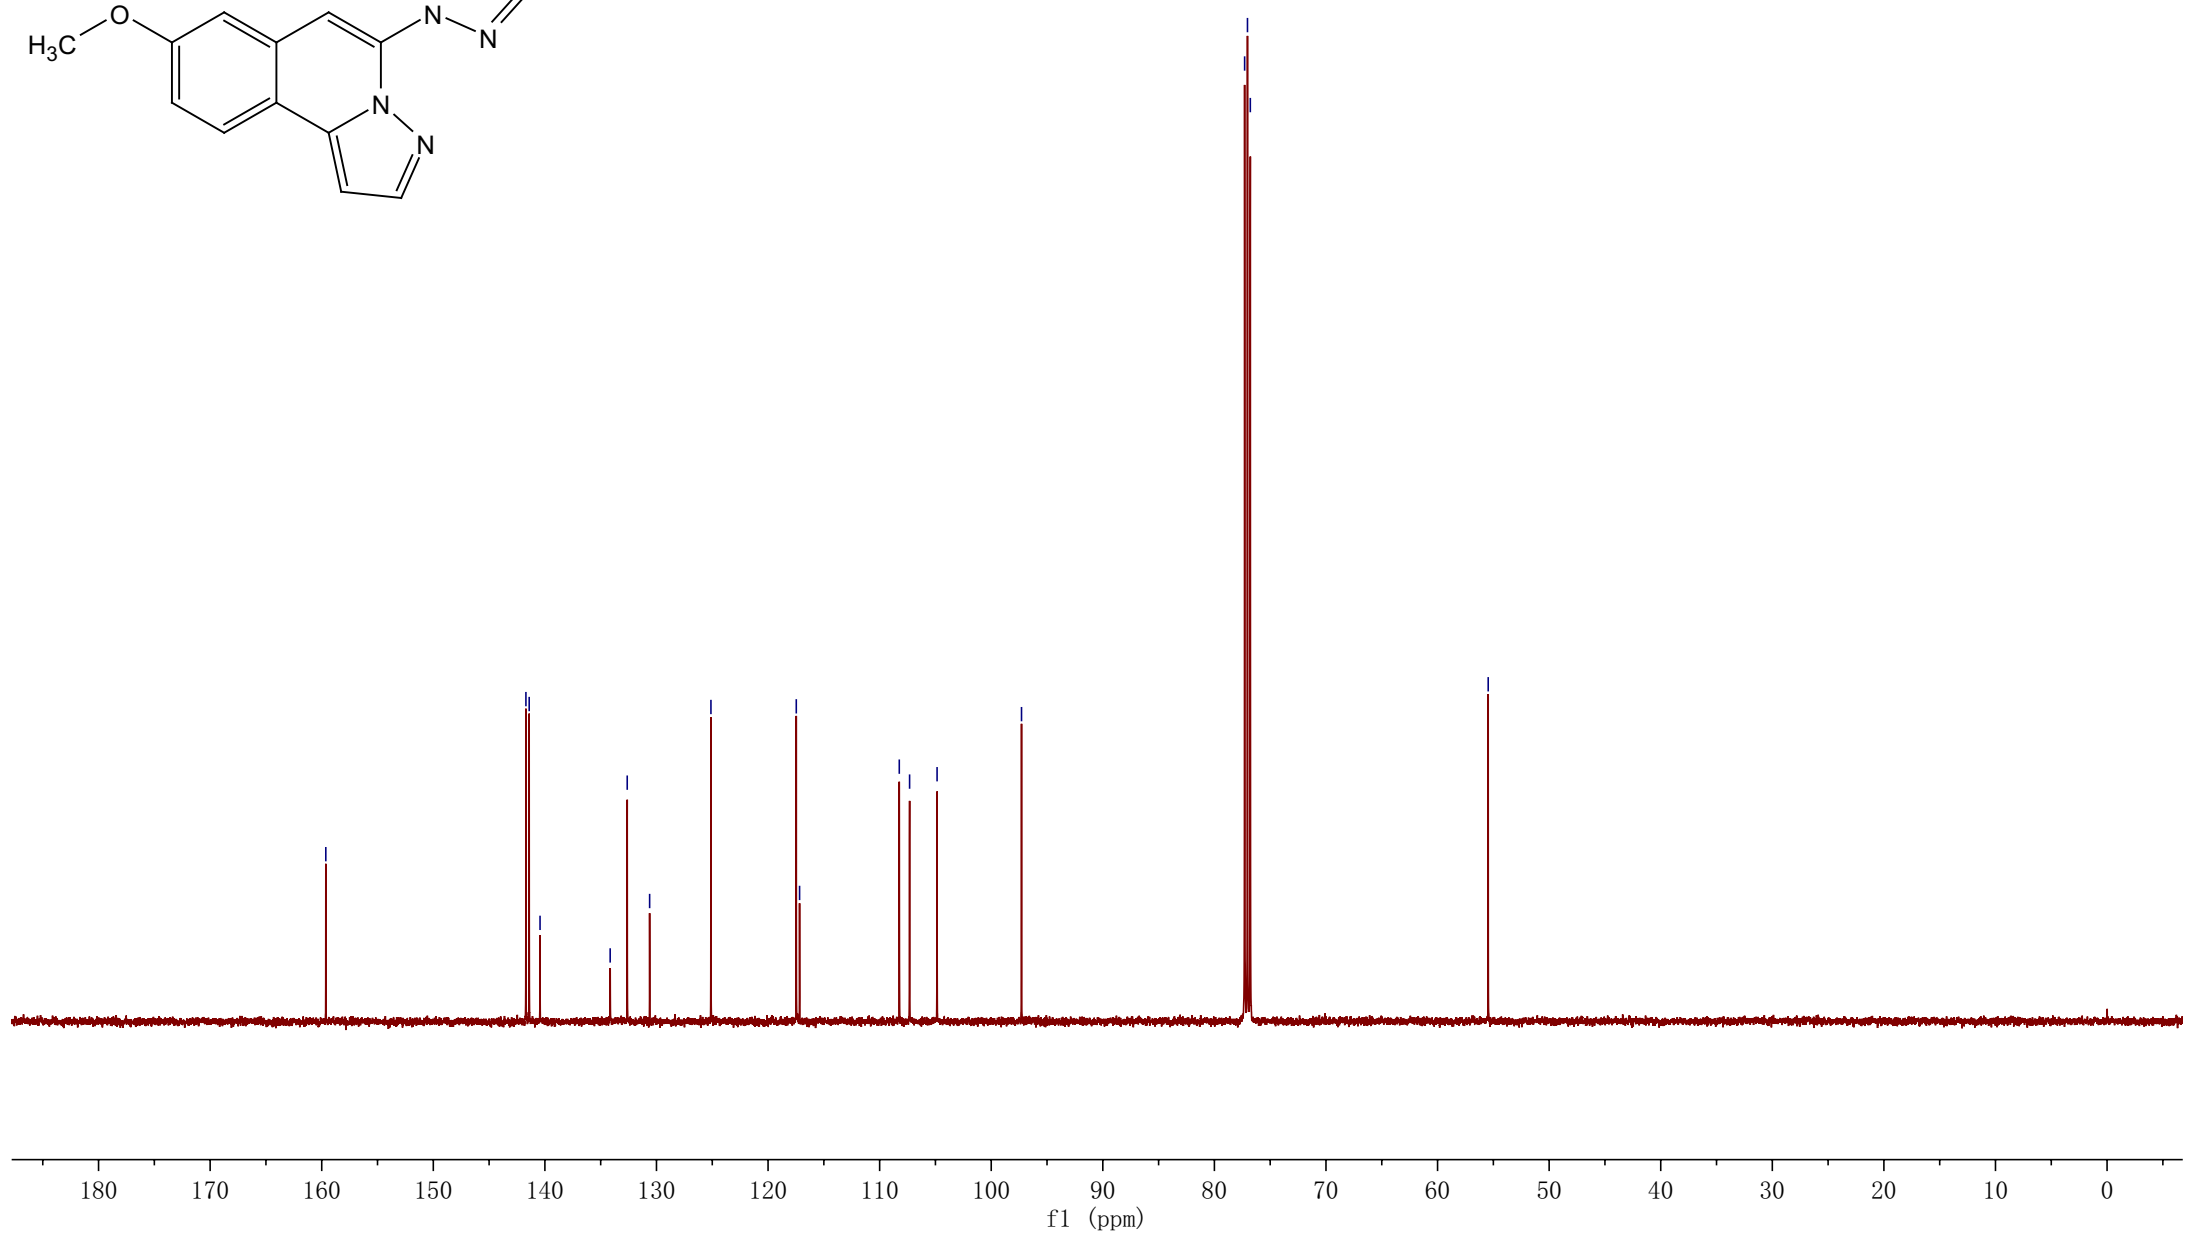

150415  
YDP150413b CDCl3

8.7553  
8.7503

8.0323  
8.0282  
7.8561  
7.8532

7.4377  
7.3911  
7.1405  
6.9839  
6.9796  
6.5951  
6.5911  
6.5868

4.0734  
4.0115

1.6791

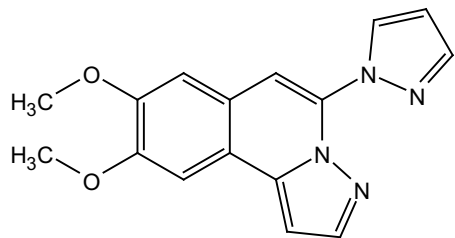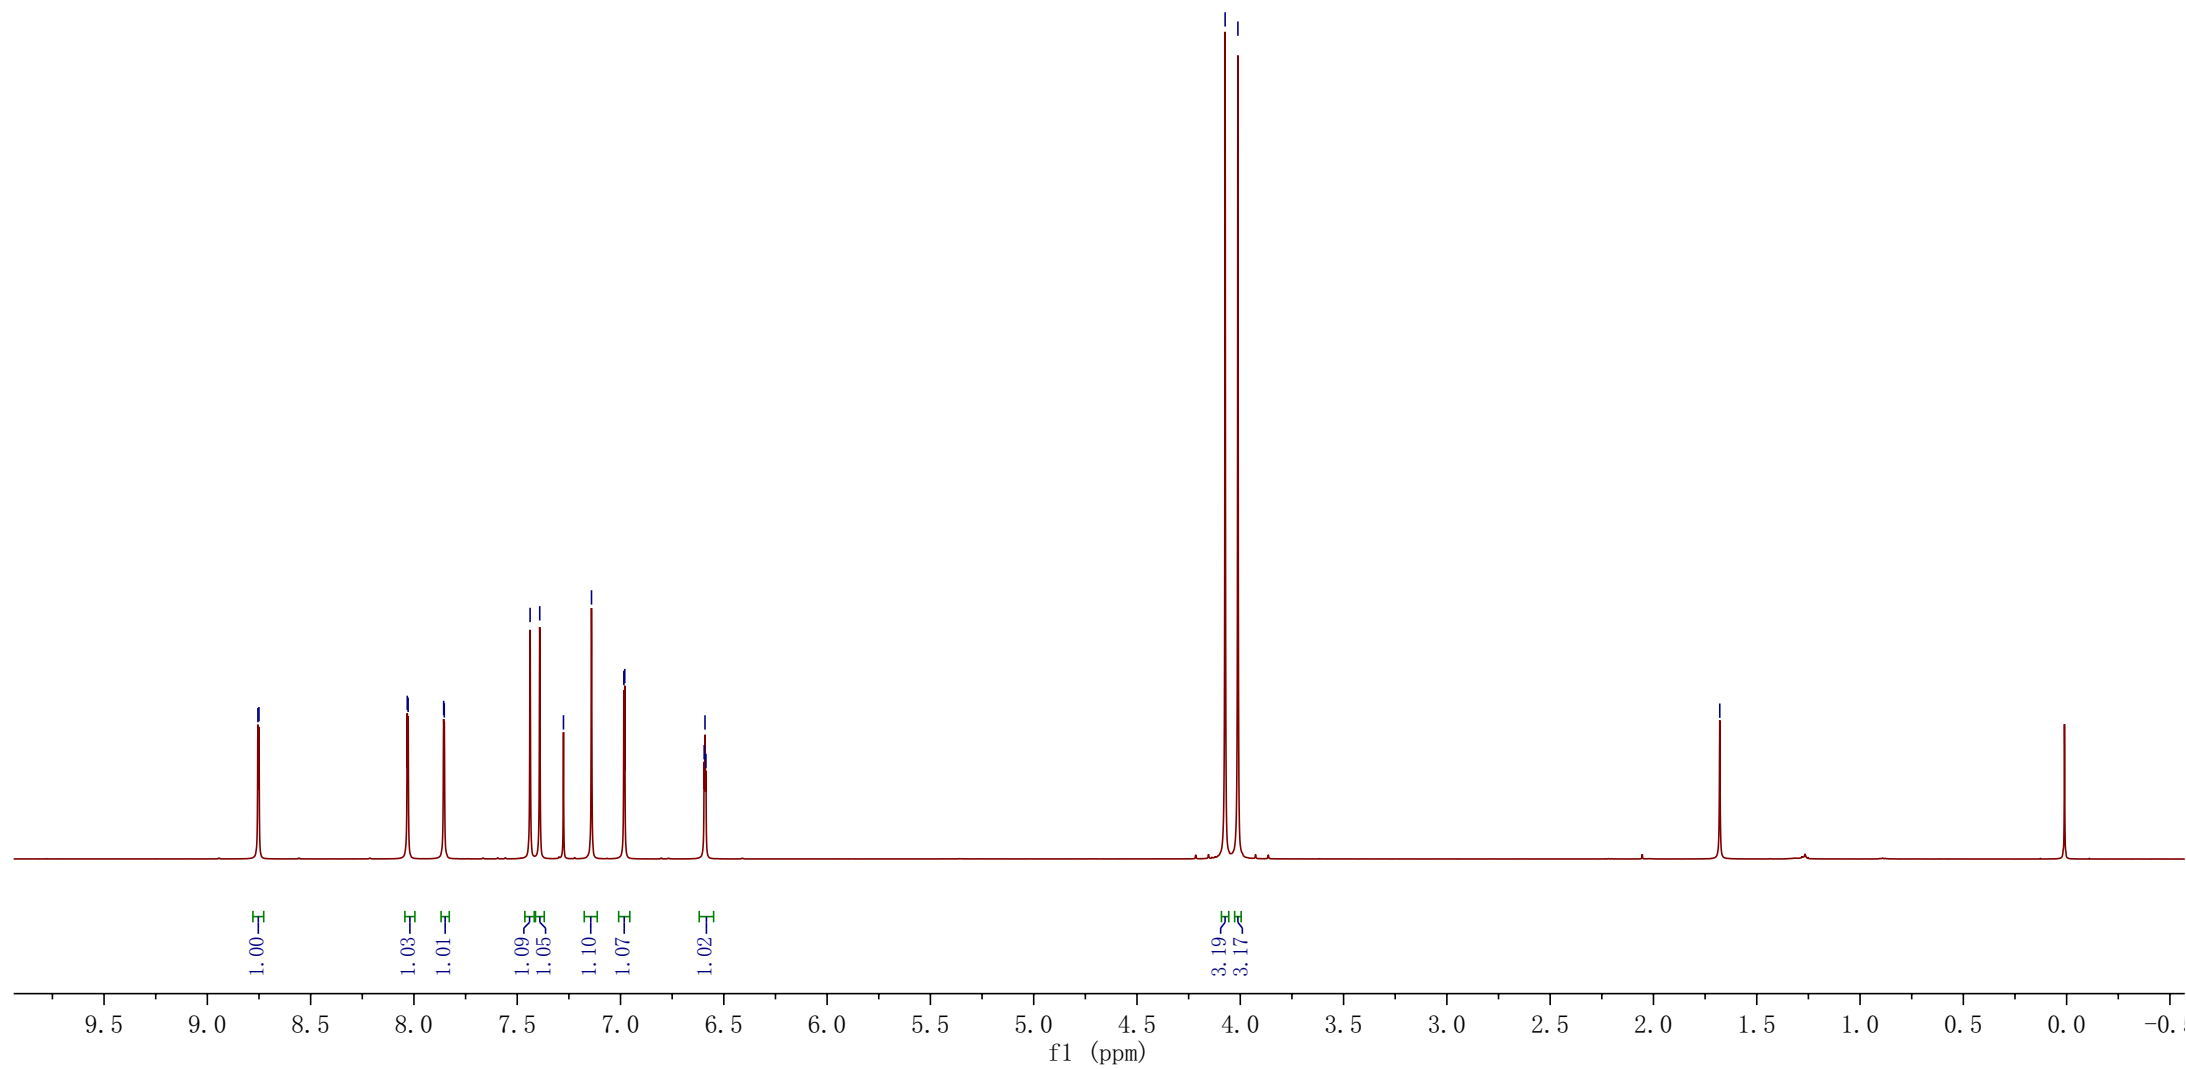

160921  
qk20160912 CDC13 0921

150.4341  
149.9336  
141.4865  
141.1757  
139.8647  
132.5908  
132.4358  
— 123.5555  
— 117.4978  
107.6188  
107.1265  
105.1133  
104.0866  
— 96.9190  
77.2907  
77.0354  
76.7817  
56.1312  
56.0033

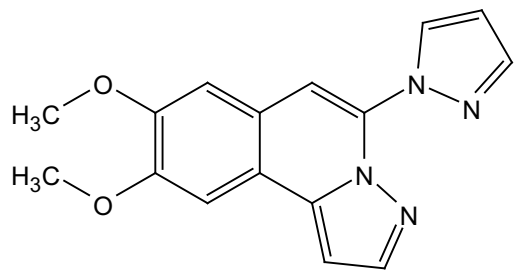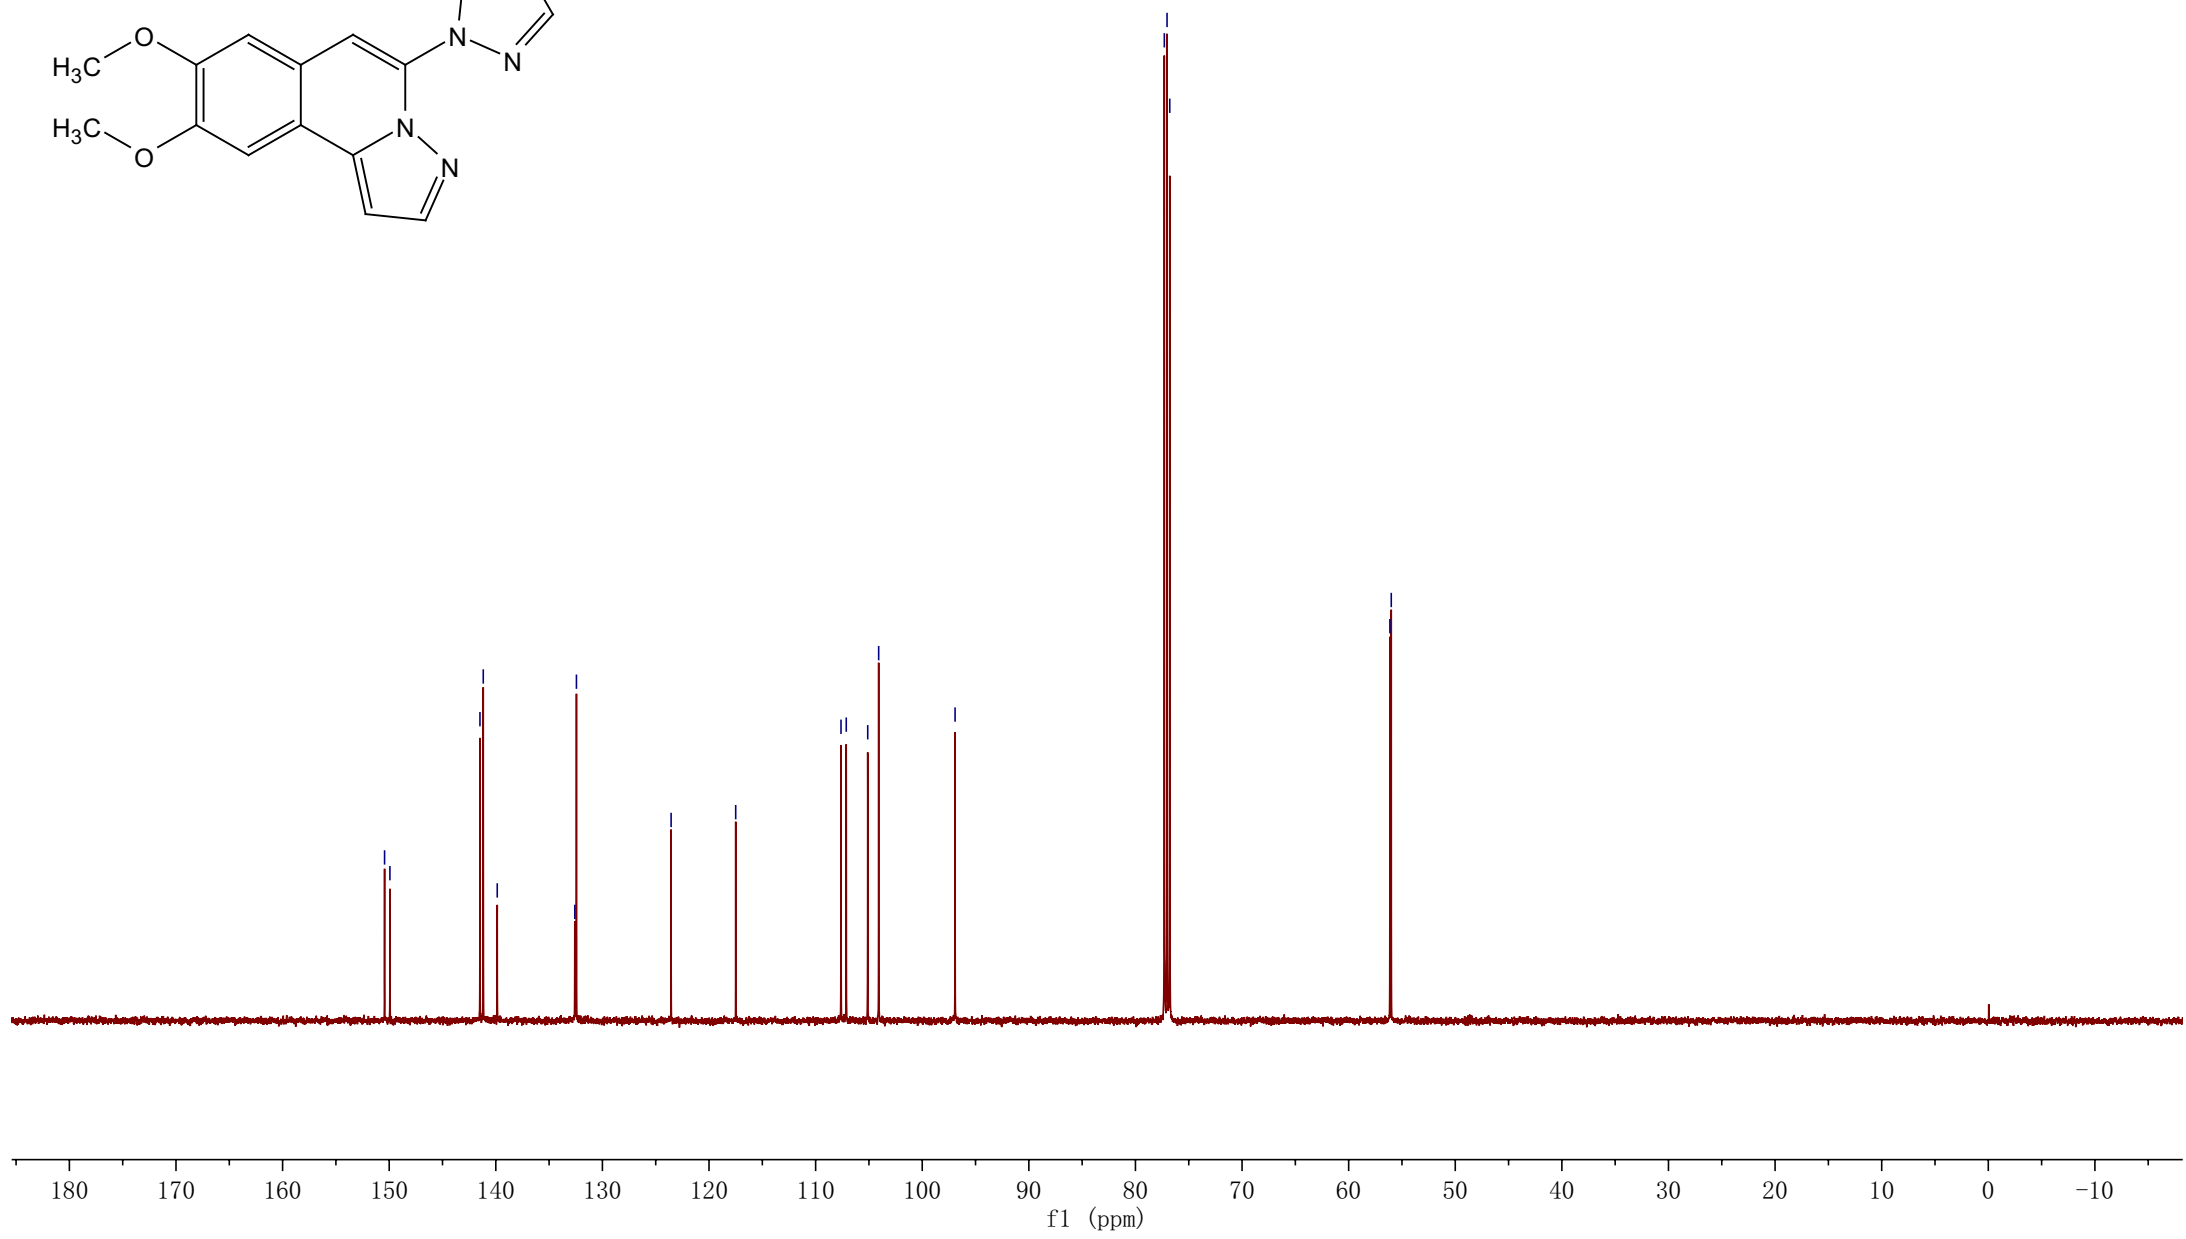

8.6768  
8.6719  
8.0057  
8.0016  
7.8822  
7.8793  
7.8496  
7.7213  
7.7197  
7.2627  
7.0168  
7.0126  
6.5942  
6.5899  
6.5857

4.0121  
4.0083

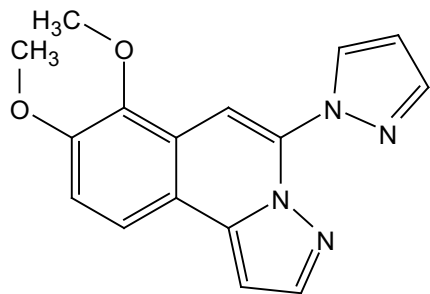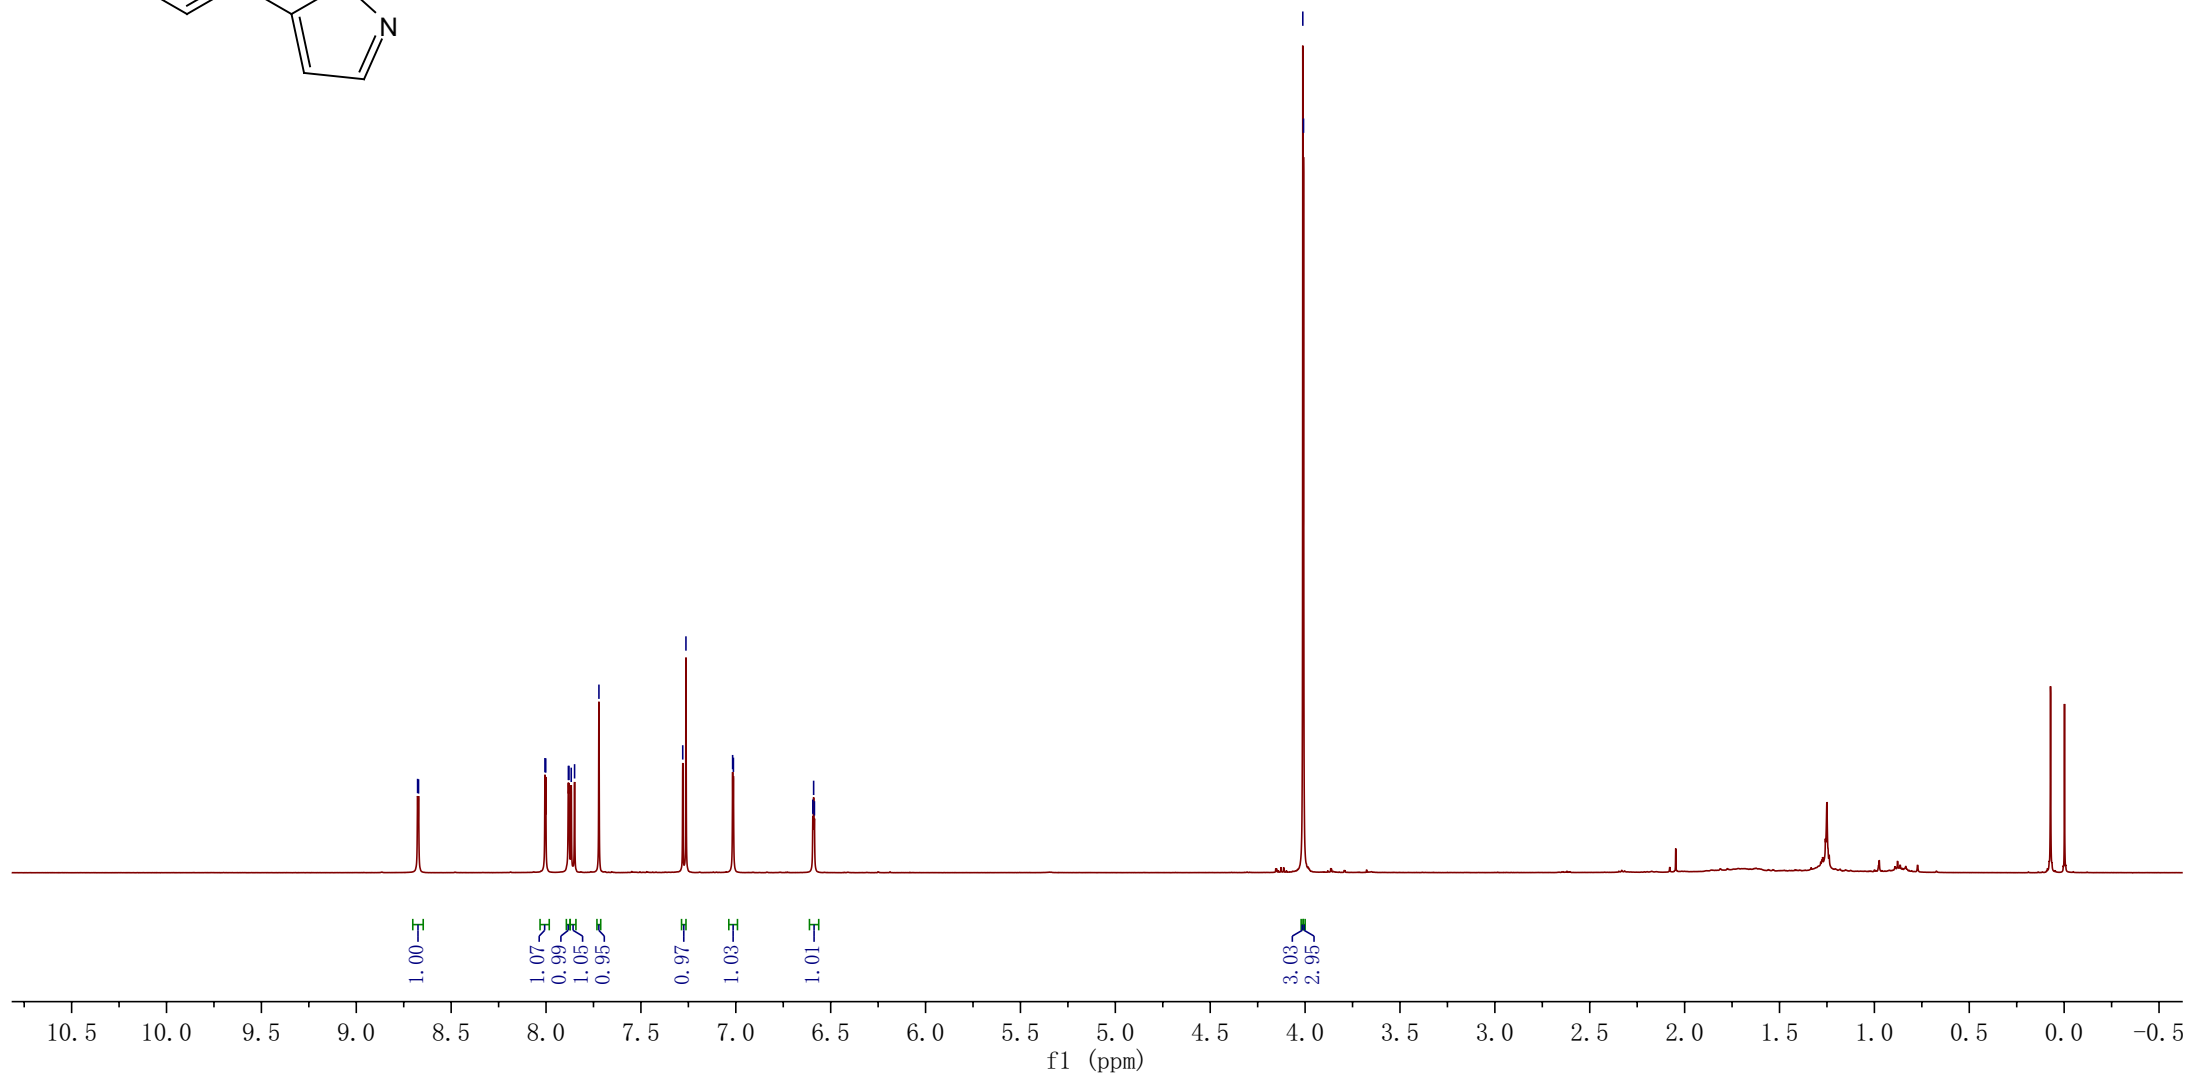

170313  
qk20161115 CDC13 0313

—151.3708  
—144.0354  
—141.7715  
—141.4249  
—140.2050  
—134.0470  
—132.6461  
  
—124.5505  
—119.5851  
—118.0476  
—114.1509  
  
—107.3034  
  
—100.3099  
—97.8996  
  
—77.2893  
—77.0345  
—76.7798  
  
—61.4484  
—56.3634  
  
—29.6991

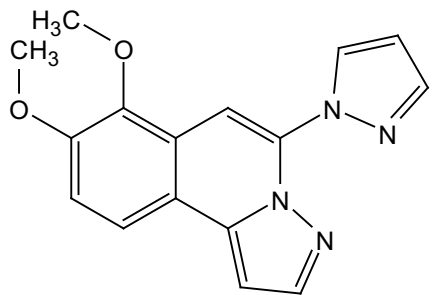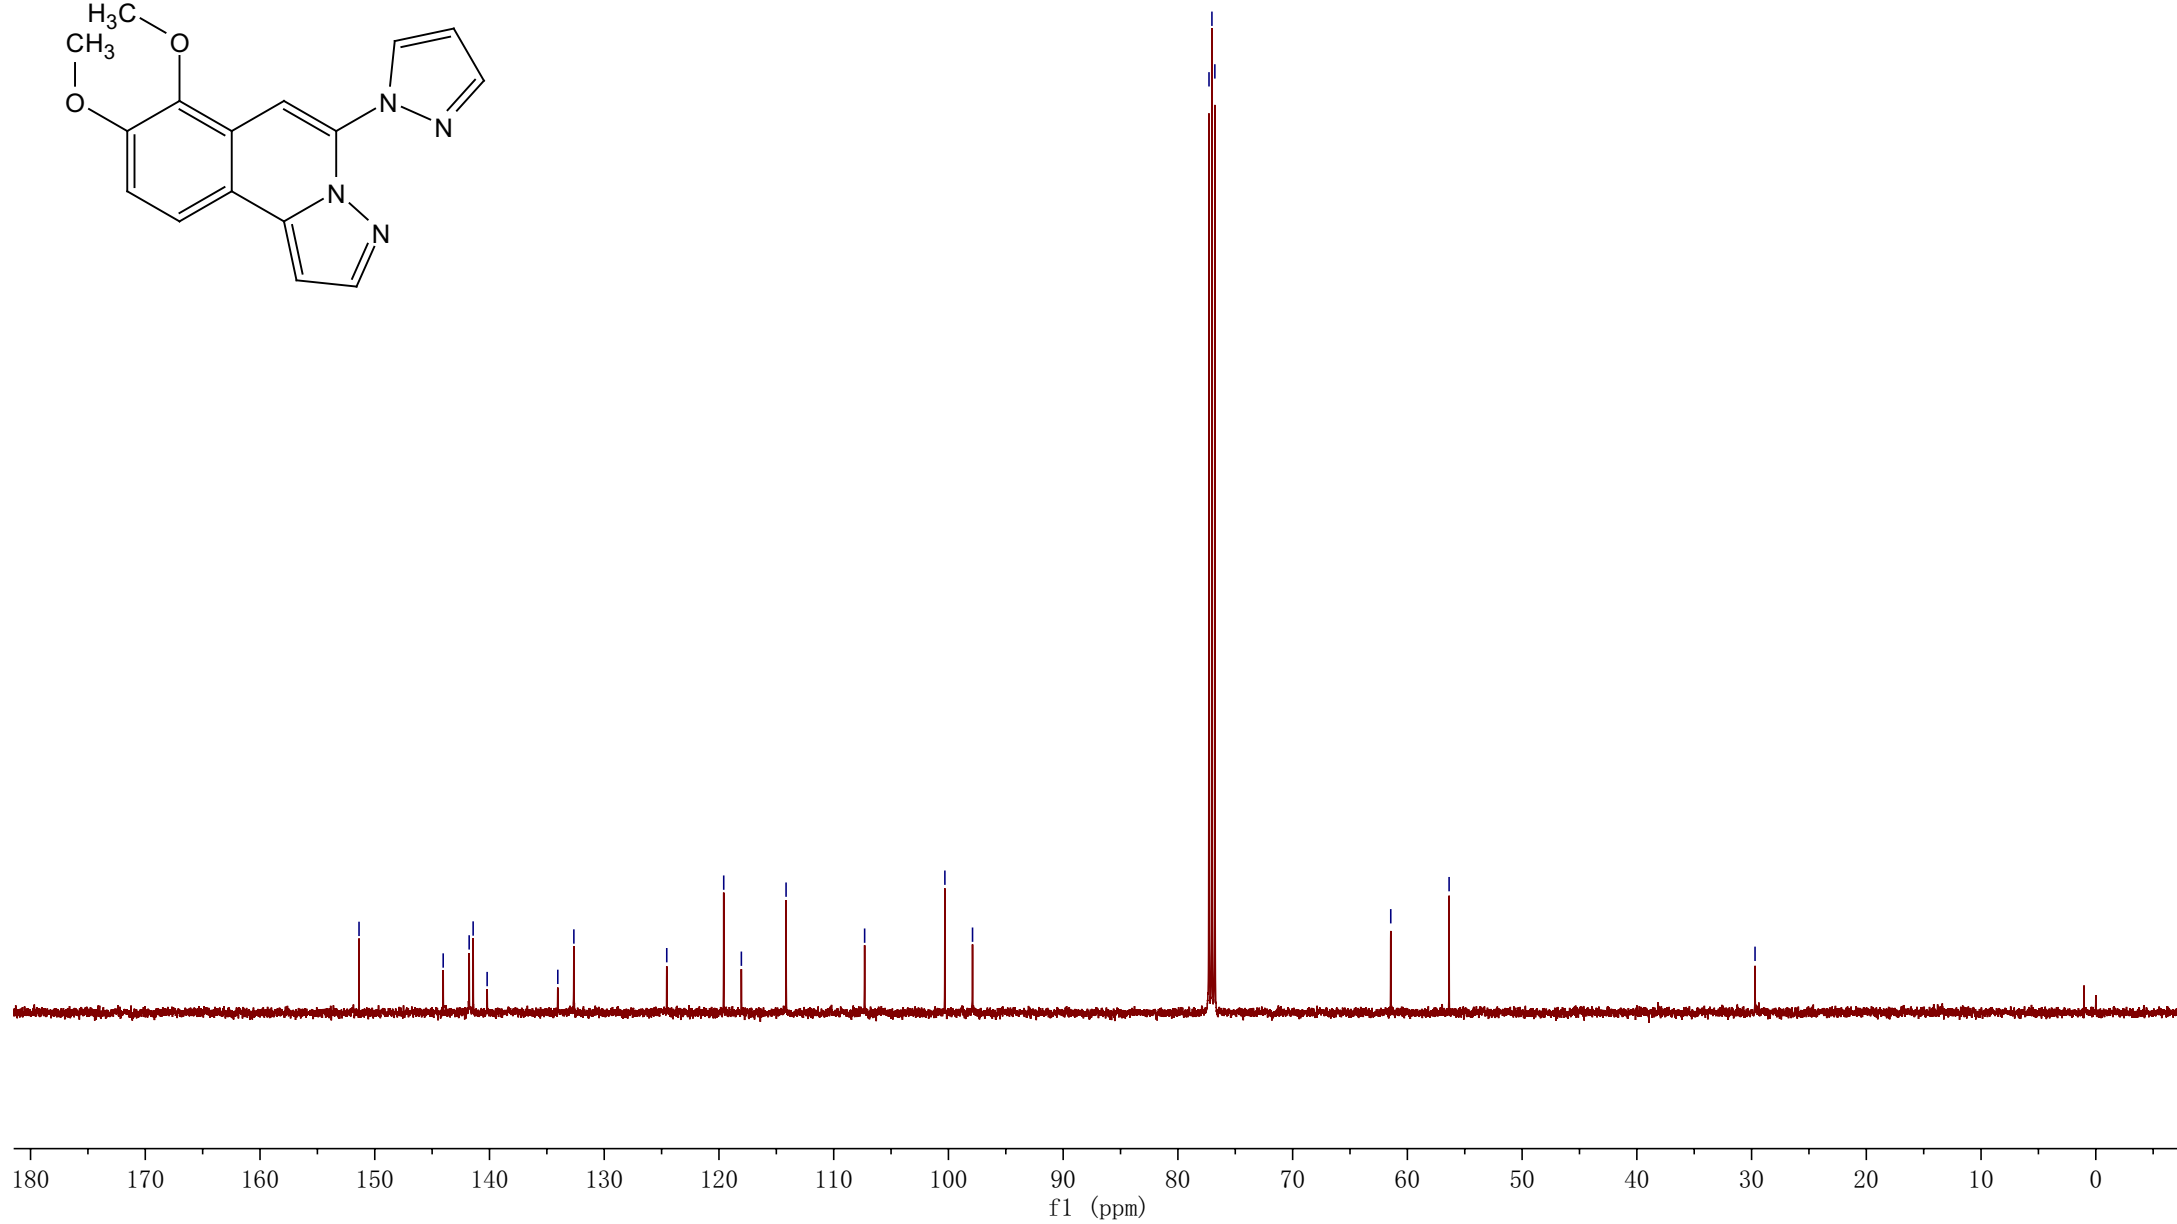

8.6695  
8.6644  
8.0698  
8.0657  
7.8556  
7.5302  
7.5128  
7.4835  
7.4793  
7.3552  
7.2772  
7.2691  
6.5920  
6.5877  
6.5834

4.0574  
4.0186

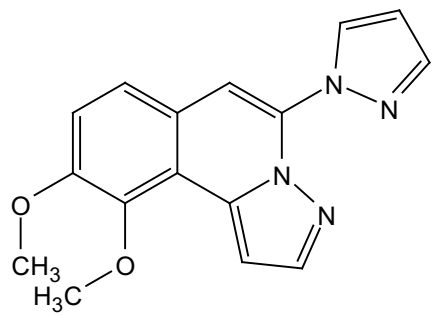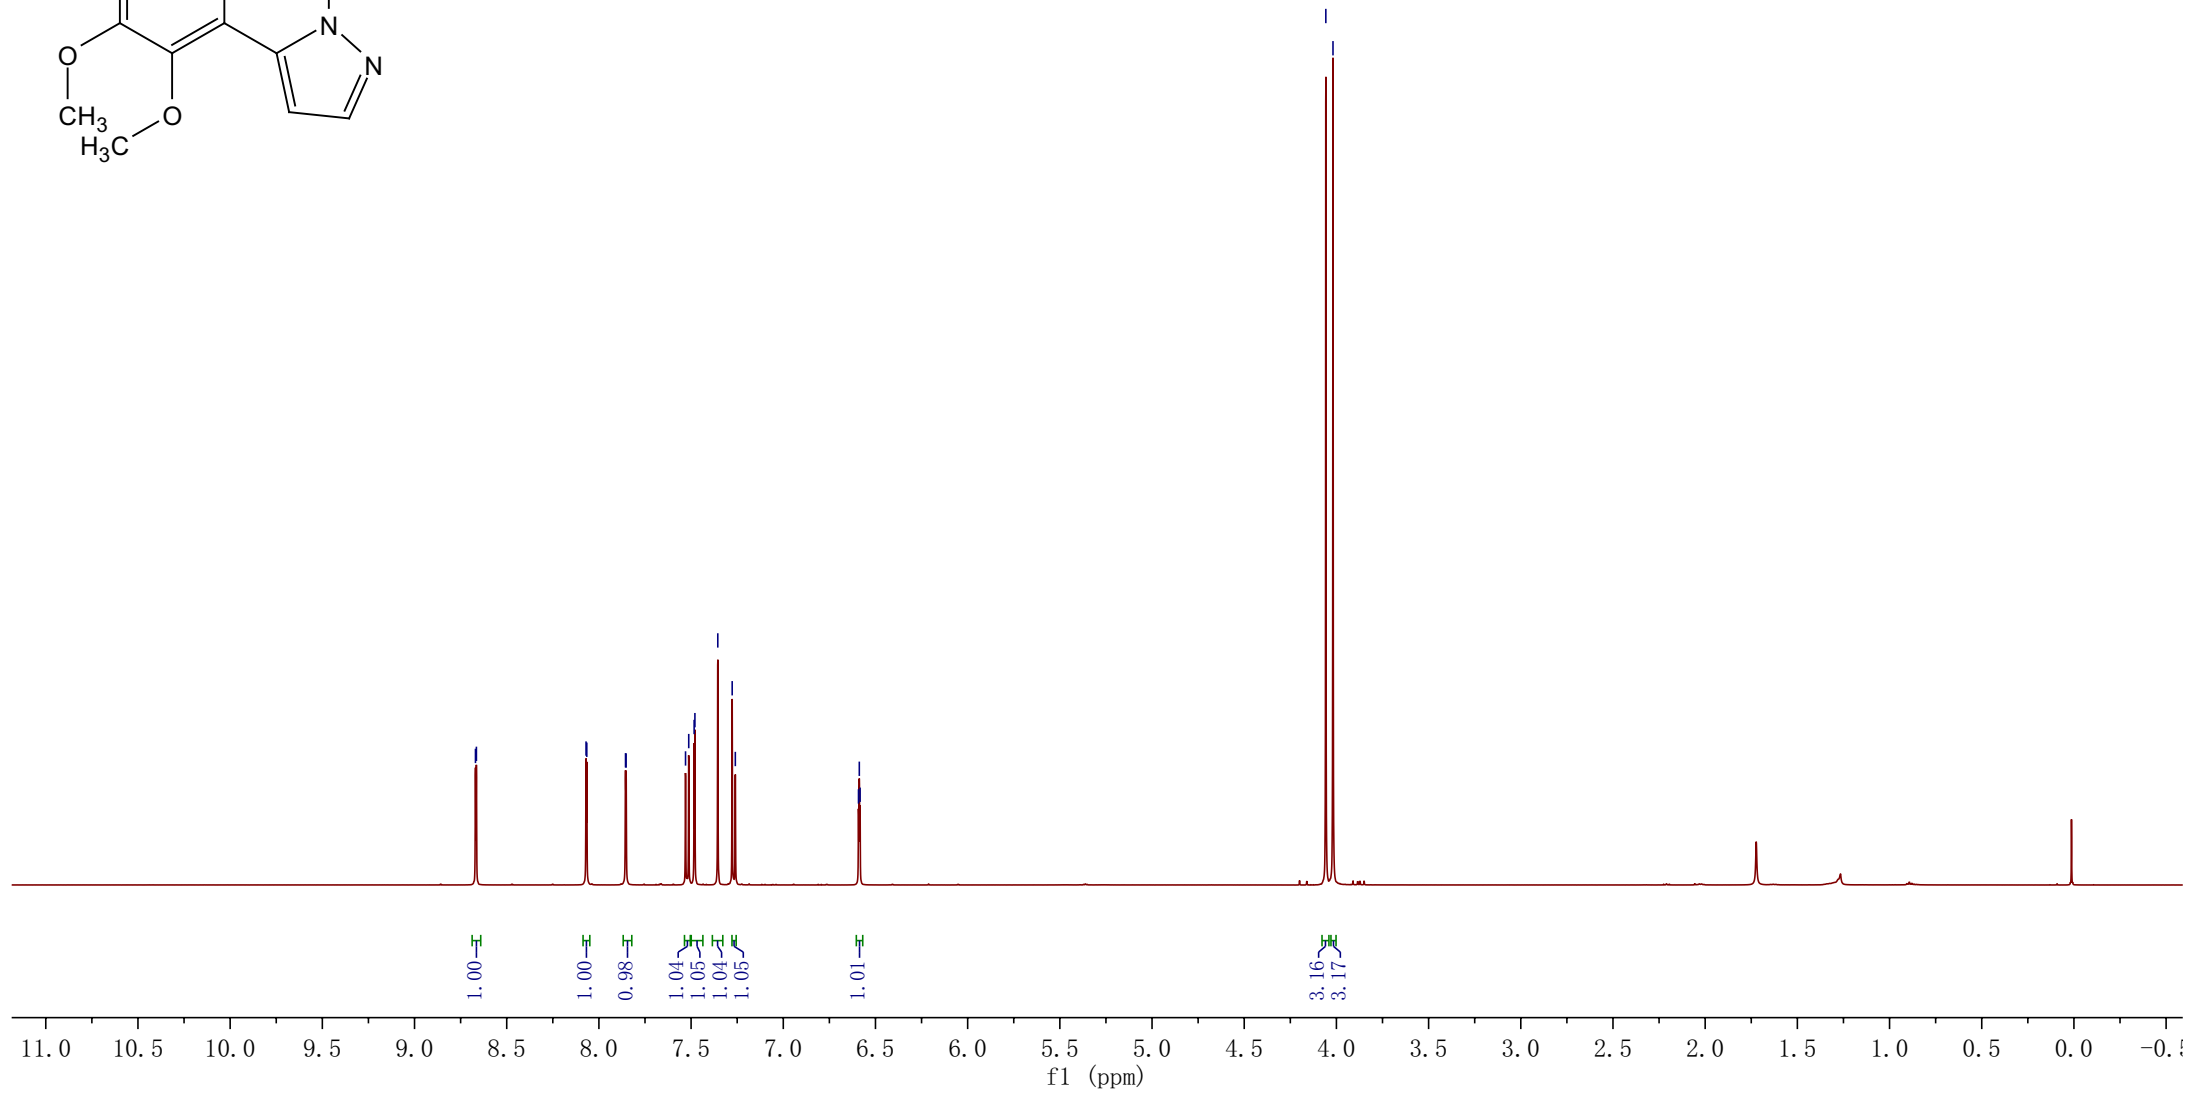

170321  
qk20170225c CDC13 0321

151.54  
144.00  
141.48  
141.31  
136.73  
132.57  
132.46  
123.84  
123.43  
118.75  
114.43  
107.14  
105.73  
103.34  
77.29  
77.03  
76.78  
60.06  
56.39

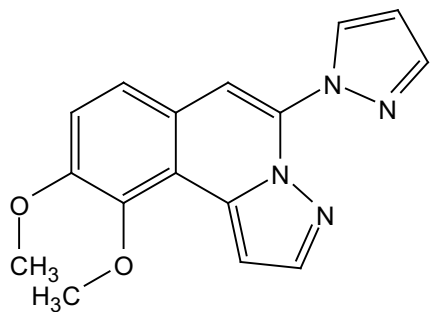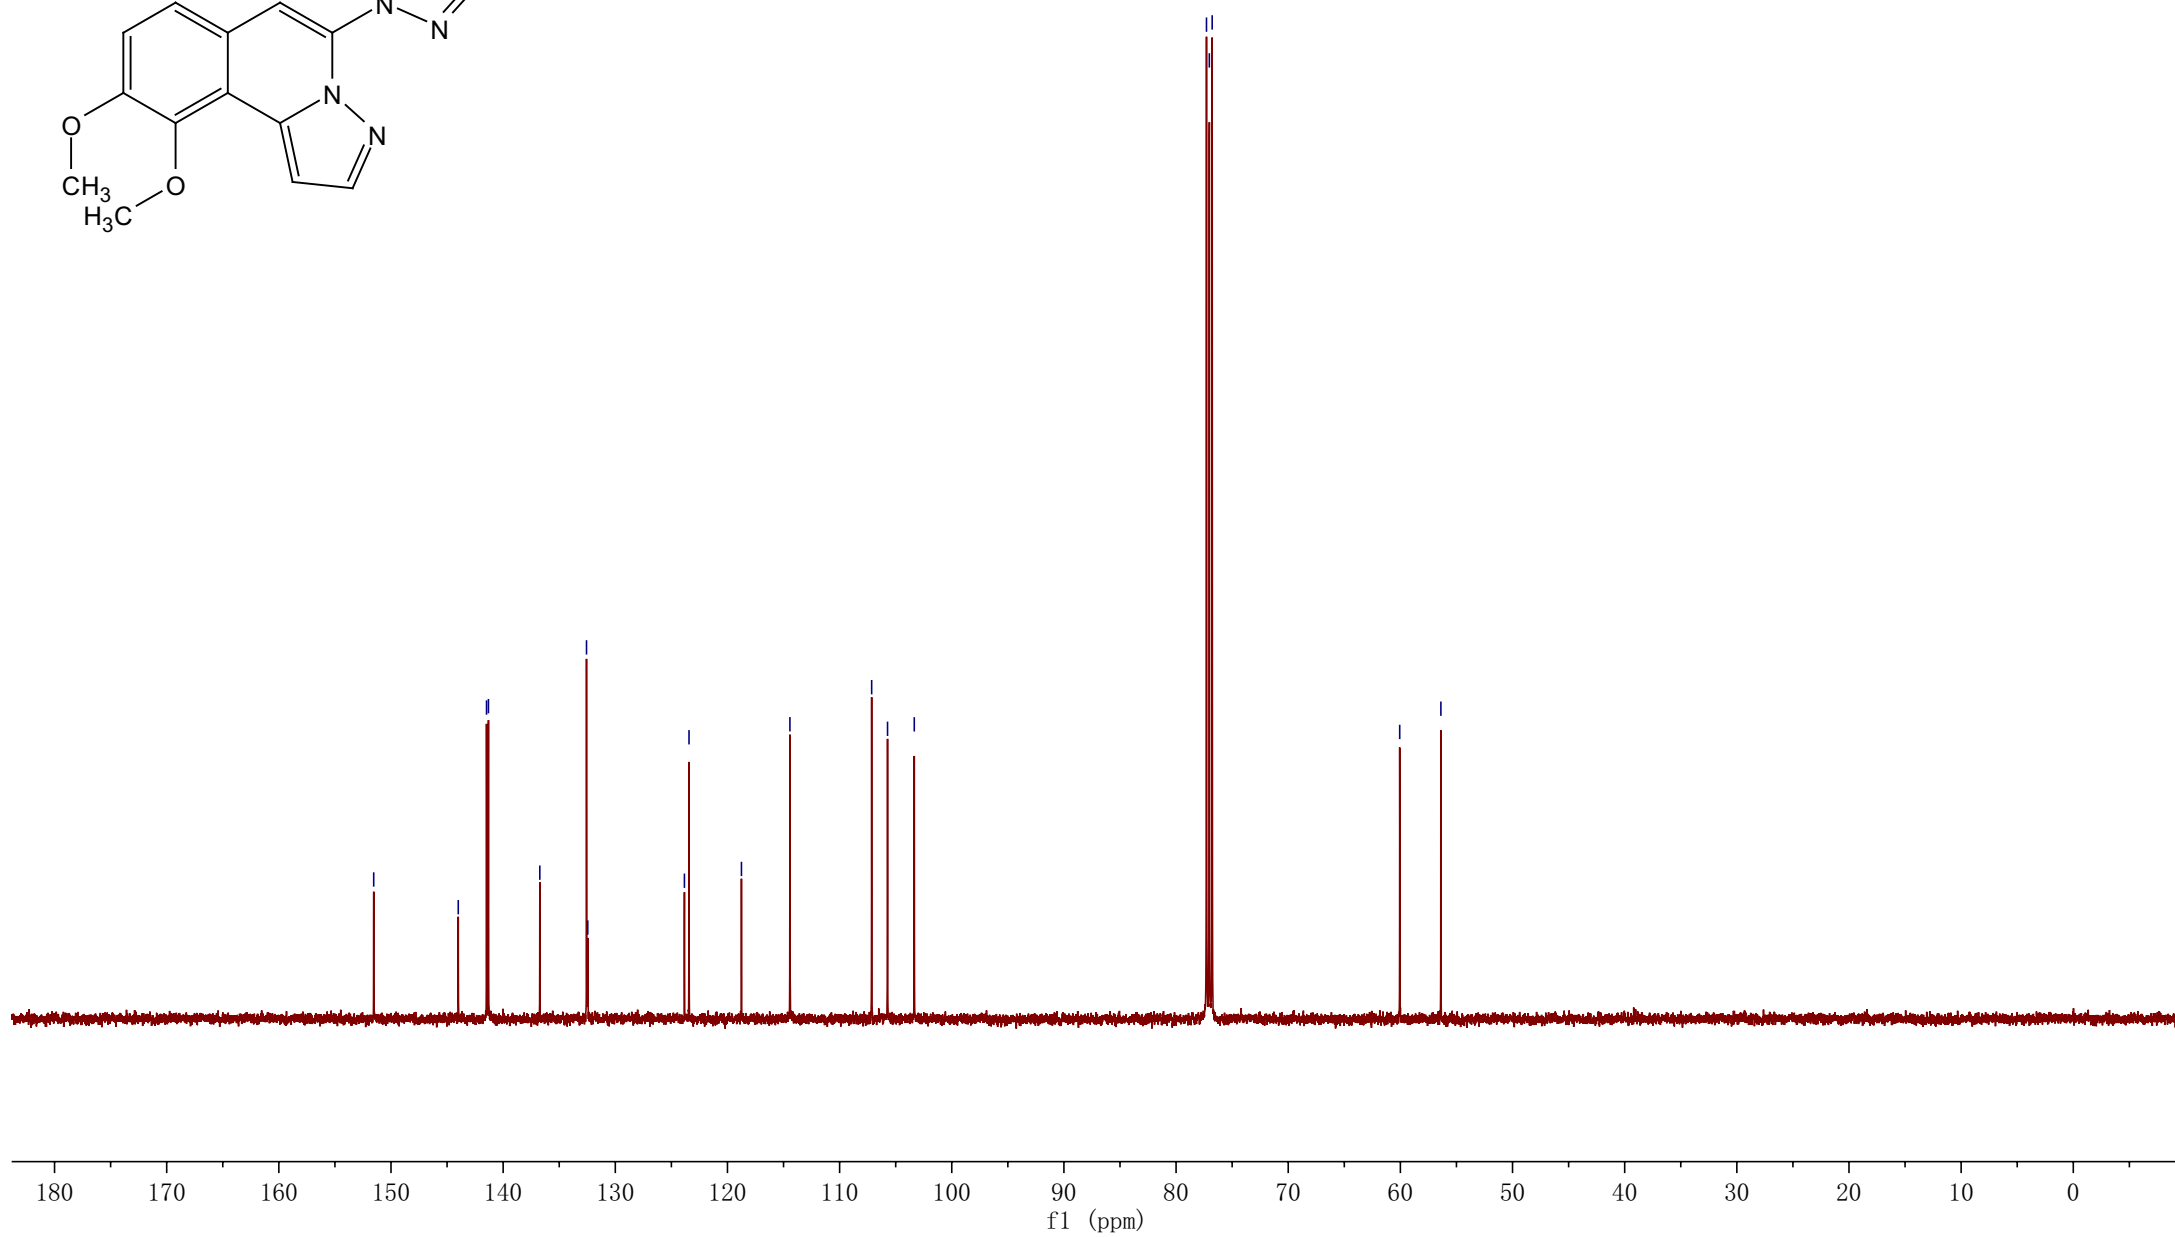

170220

qk20170116-b CDC13 0220

8.7784  
8.7735  
8.0033  
7.9990  
7.8495  
7.8465  
7.4098  
7.3443  
7.0875  
6.9230  
6.9187  
6.5868  
6.5830  
6.5822  
6.5865

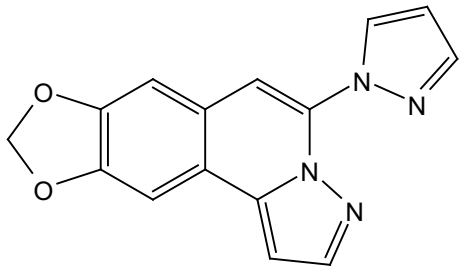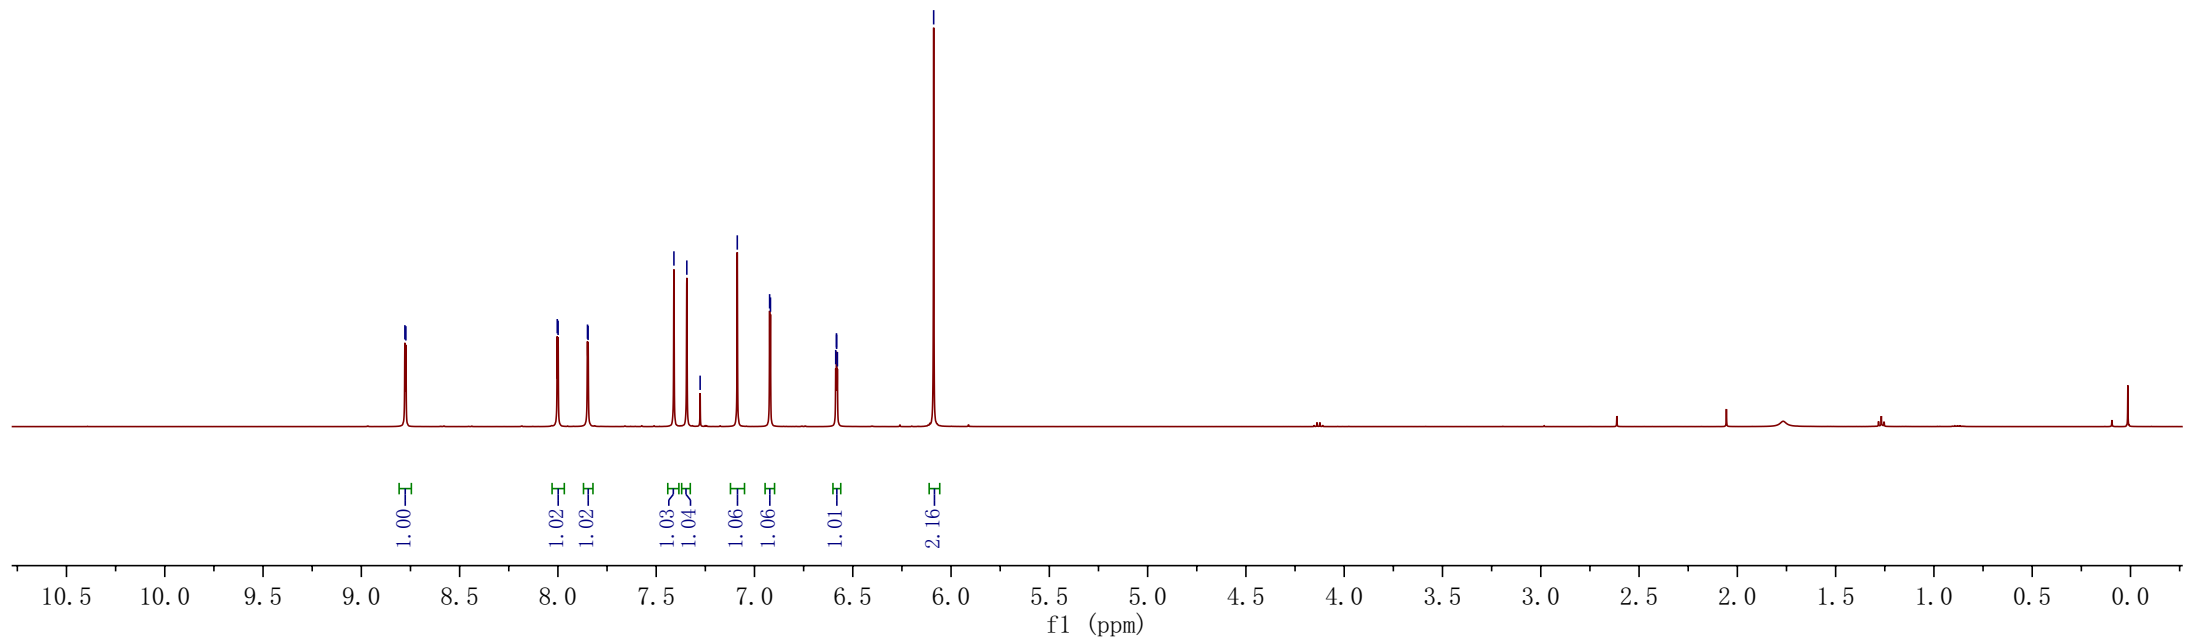



4h  
qk20170116-b CDC13 0222

148.8803  
148.3677  
141.5578  
141.1919  
140.1178  
132.6836  
132.4727  
124.9213  
118.7686  
107.2245  
105.2337  
101.8548  
101.7634  
97.2248  
77.3188  
77.0645  
76.8103

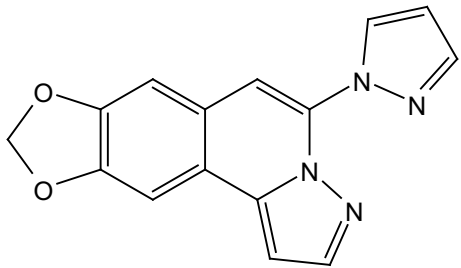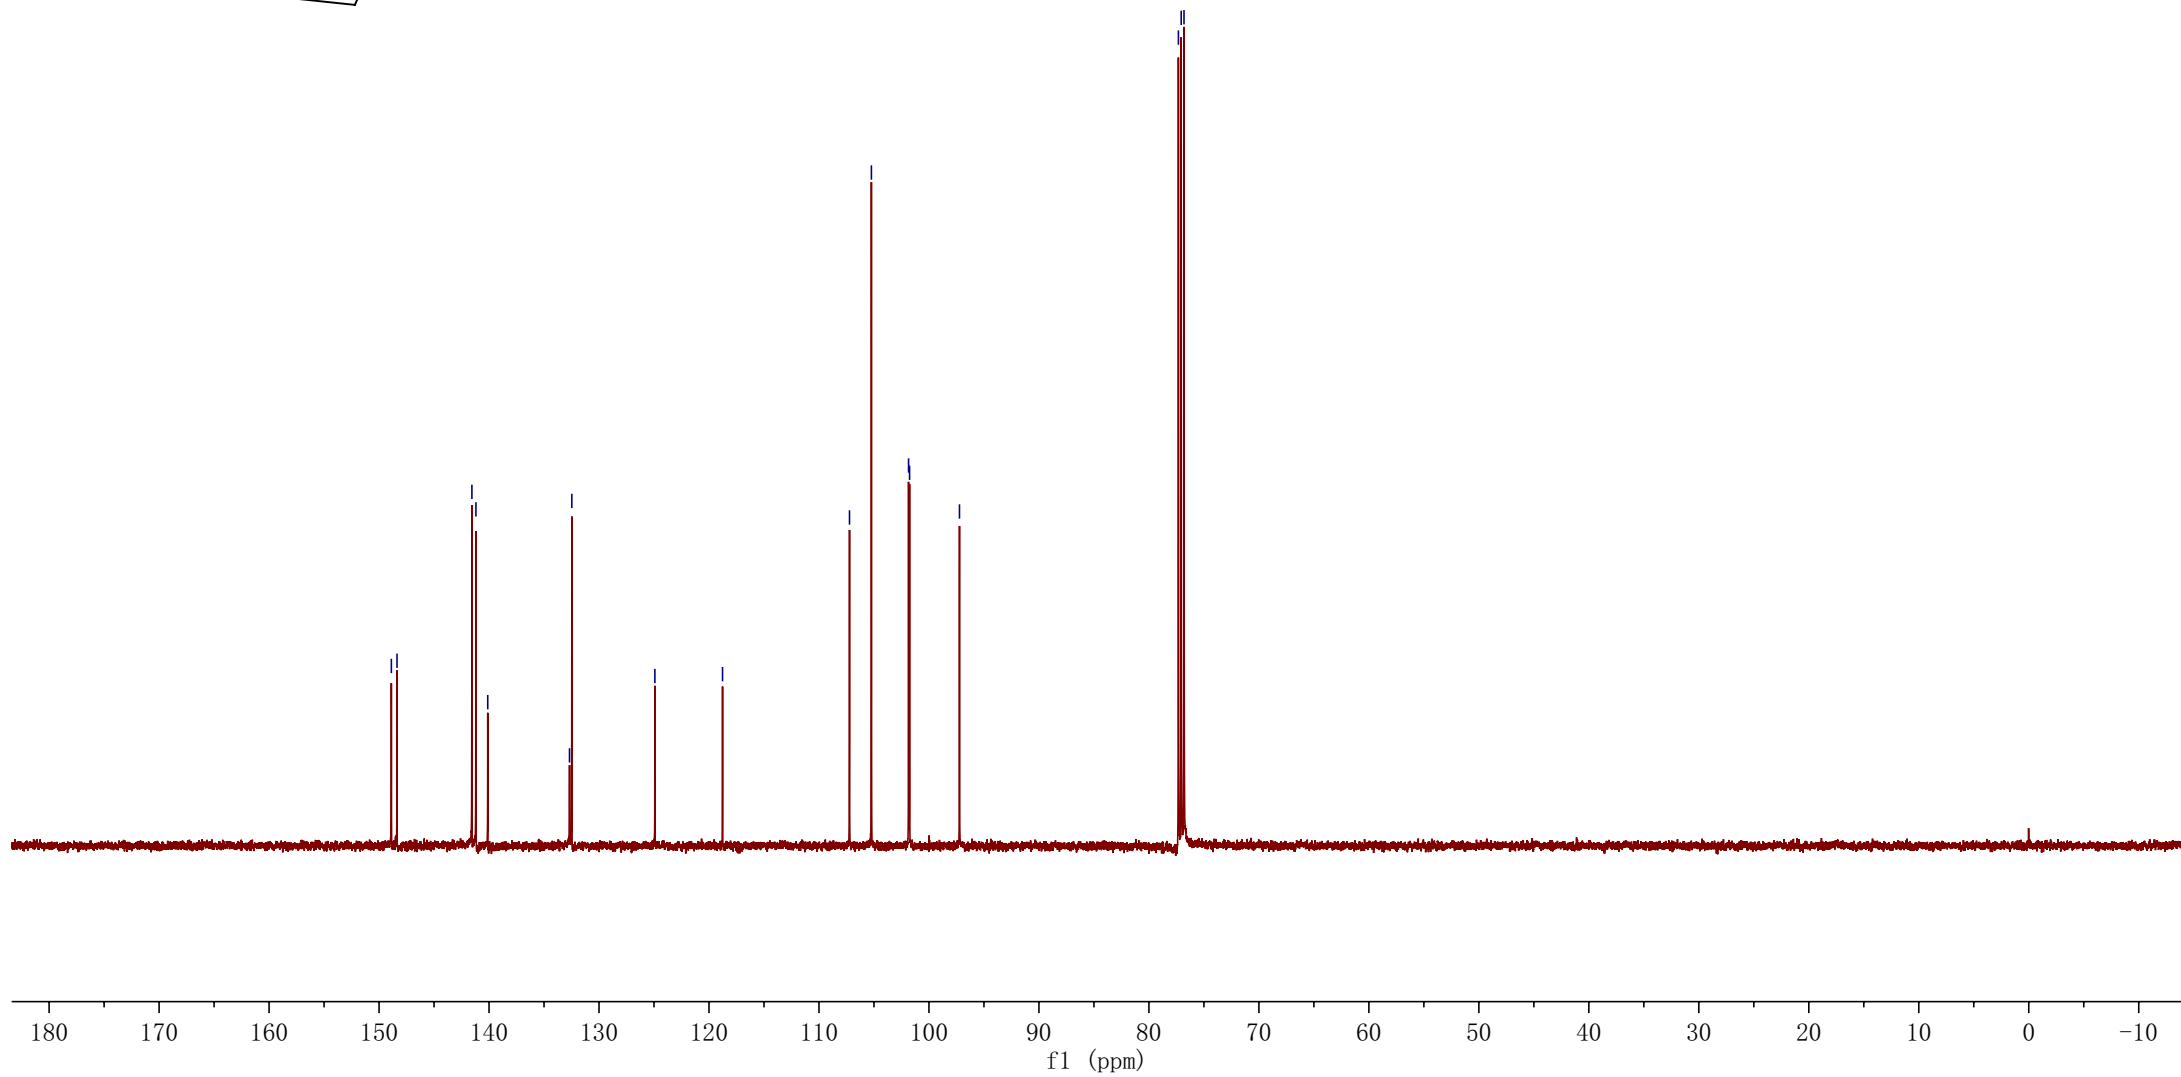

161201  
qk201611128-1 CDC13 1201

8.7943  
8.7892  
8.0649  
8.0607  
7.8678  
7.8650  
7.7607  
7.7569  
7.7497  
7.4618  
7.3128  
7.3078  
7.0949  
7.0906  
6.8935  
6.5992  
6.5952

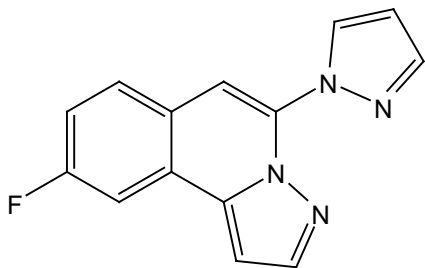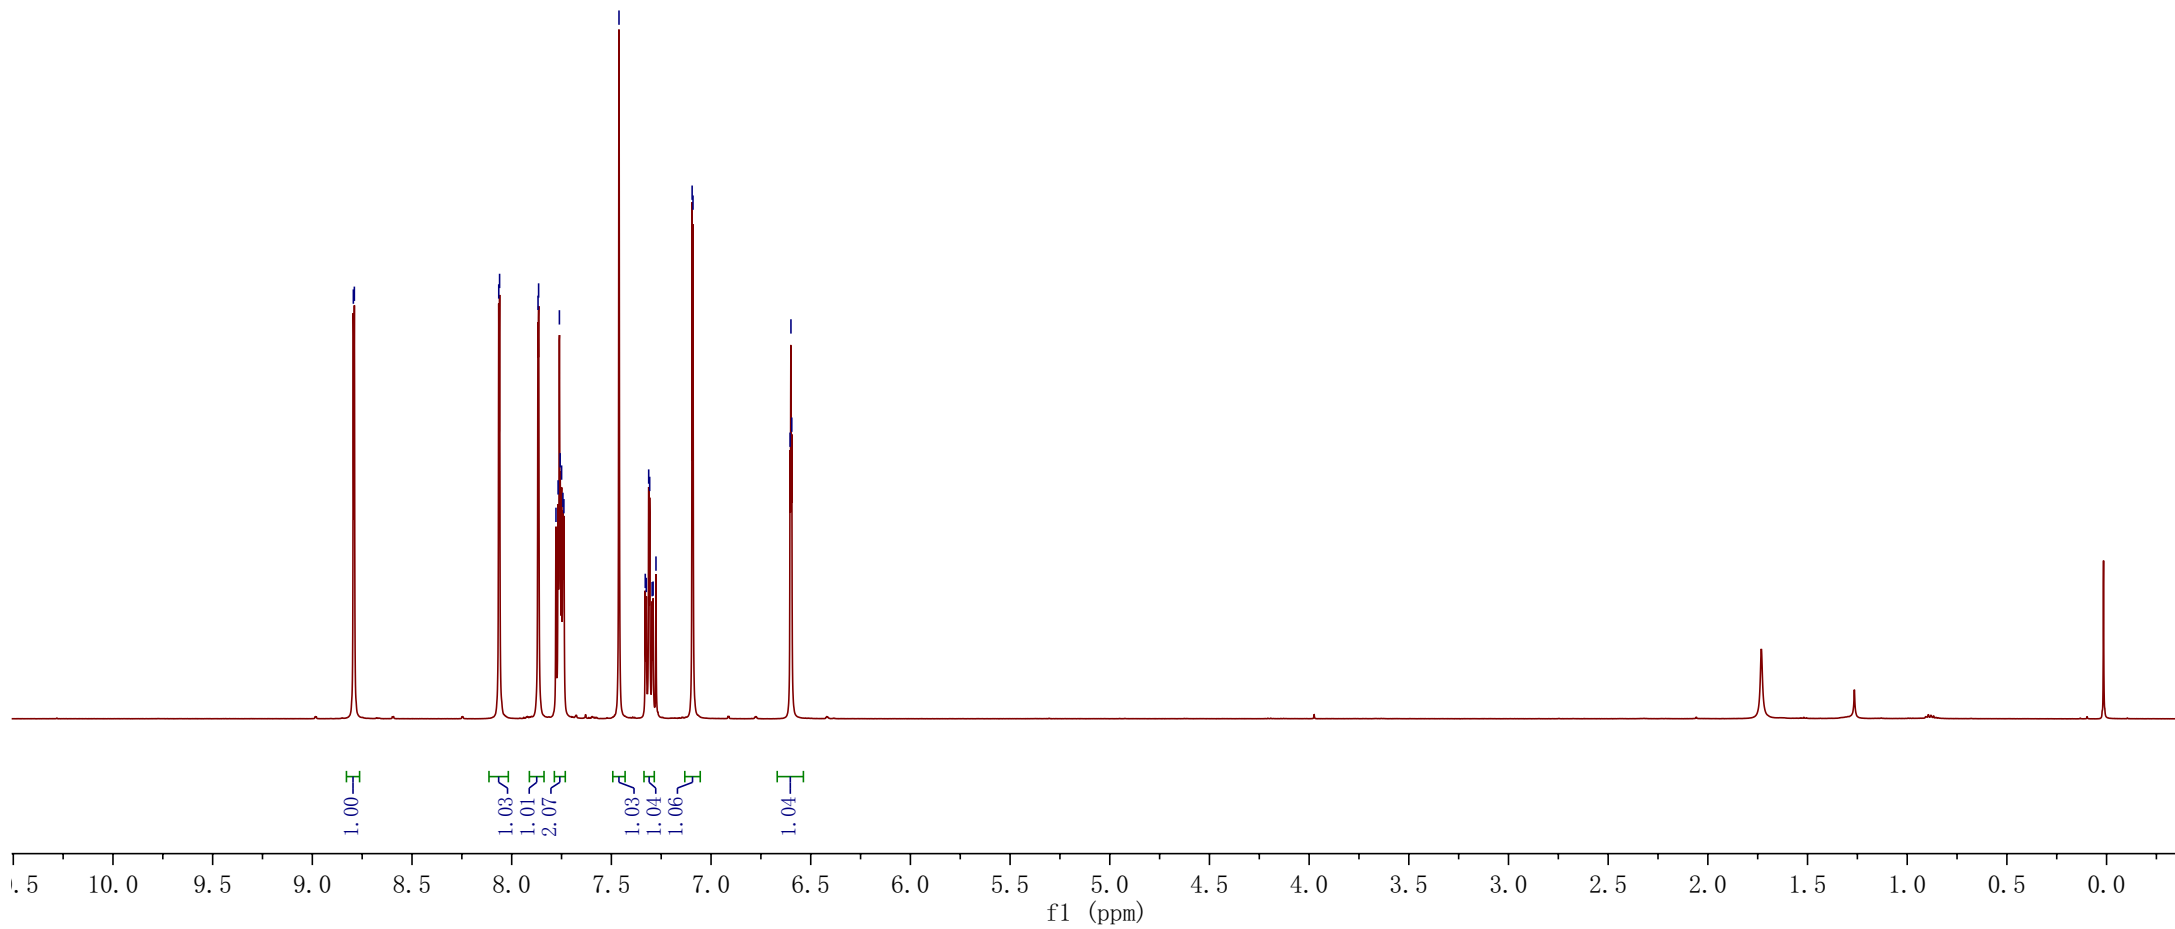

161205  
qk20161128-1 CDC13 1205

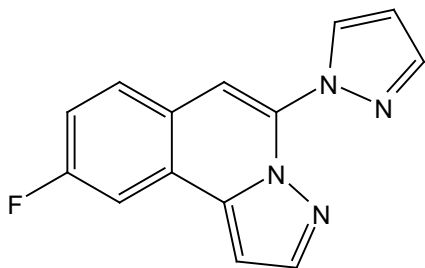

162.6759  
160.6995  
141.7742  
141.3149  
139.5486  
139.5136  
133.3313  
132.5732  
129.7879  
129.7191  
125.4276  
125.4129  
124.3488  
124.2722  
117.3634  
117.1758  
108.9860  
108.8020  
107.3965  
104.6980  
99.1385  
77.2899  
77.0347  
76.7806

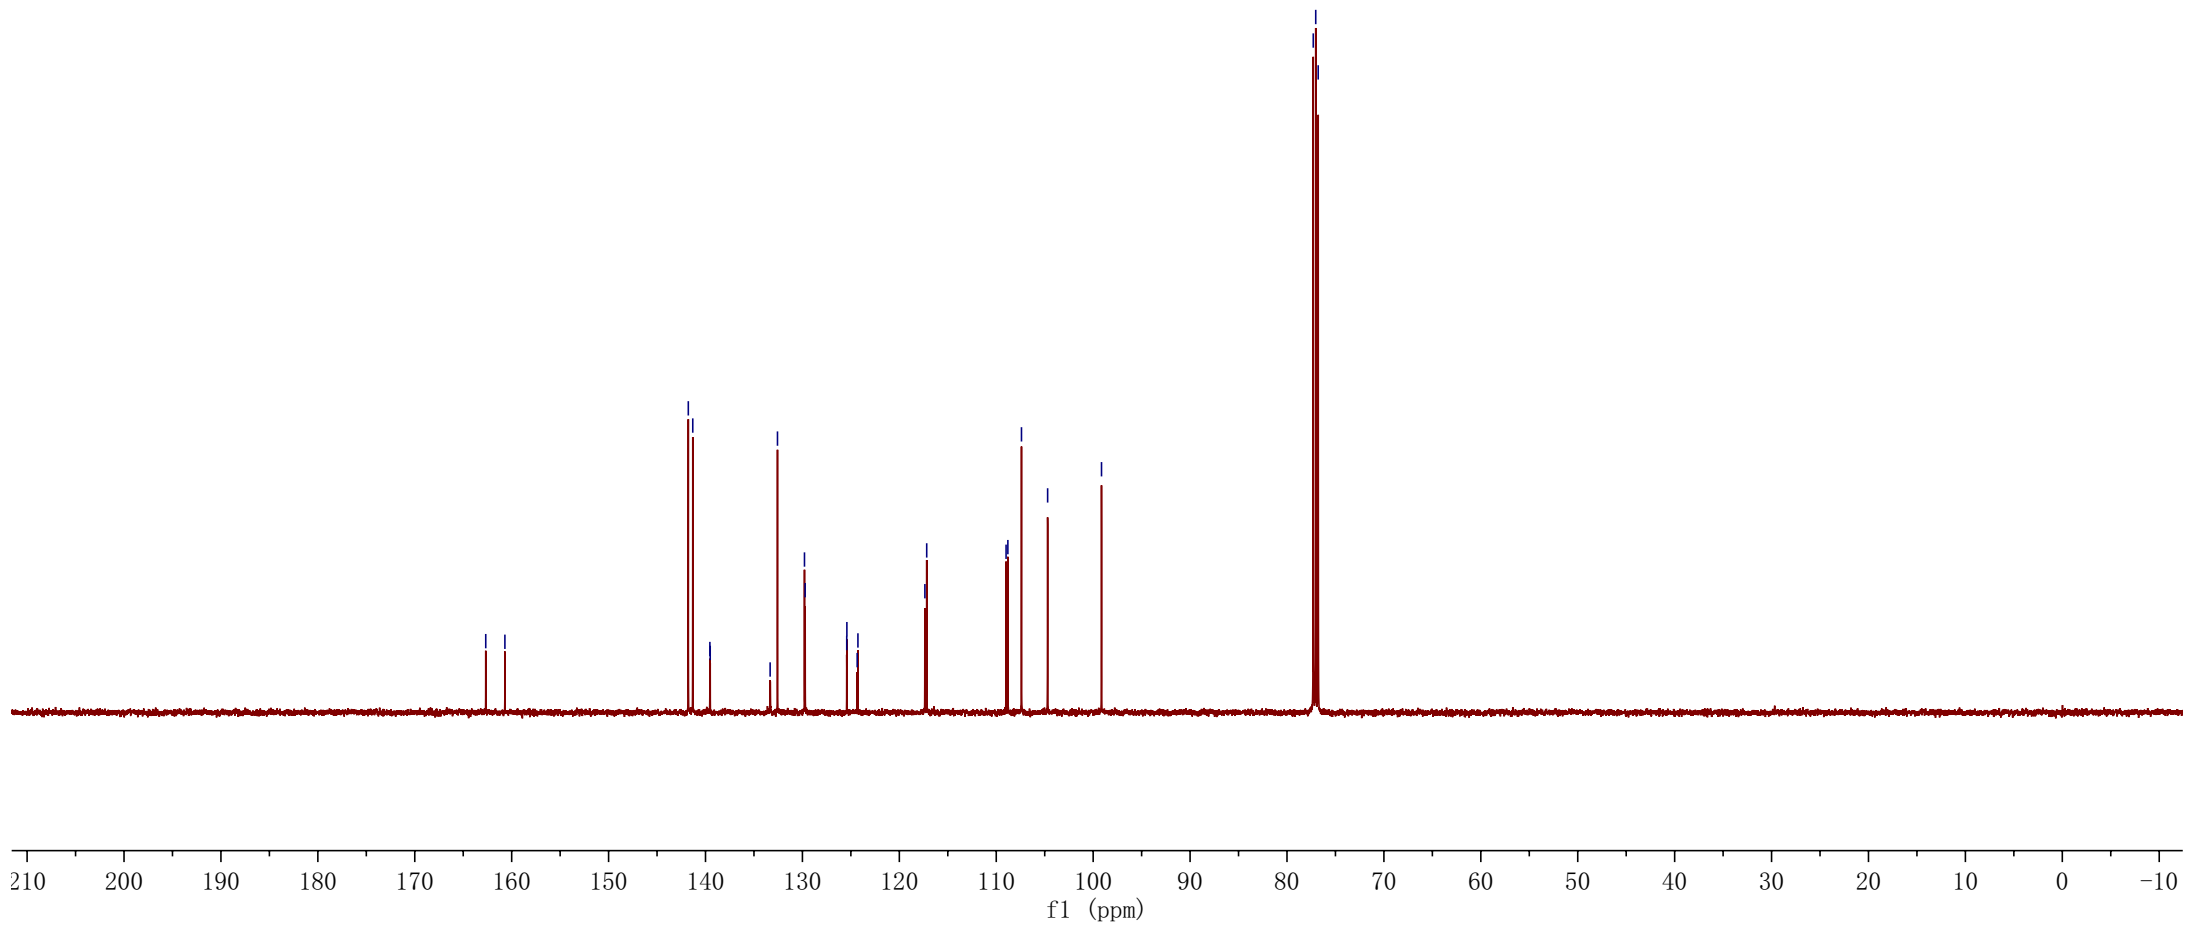

161201  
qk20161128-2 CDC13 1201

8.9107  
8.9057  
8.1001  
8.0932  
8.0592  
8.0552  
7.8702  
7.8677  
7.4518  
7.4254  
7.3056  
7.0710  
7.0668  
6.8042  
6.6002  
6.5959

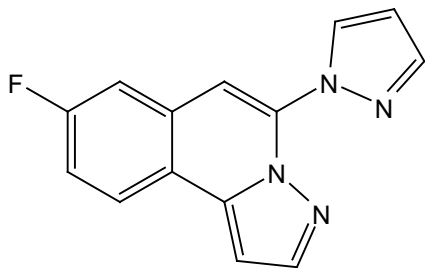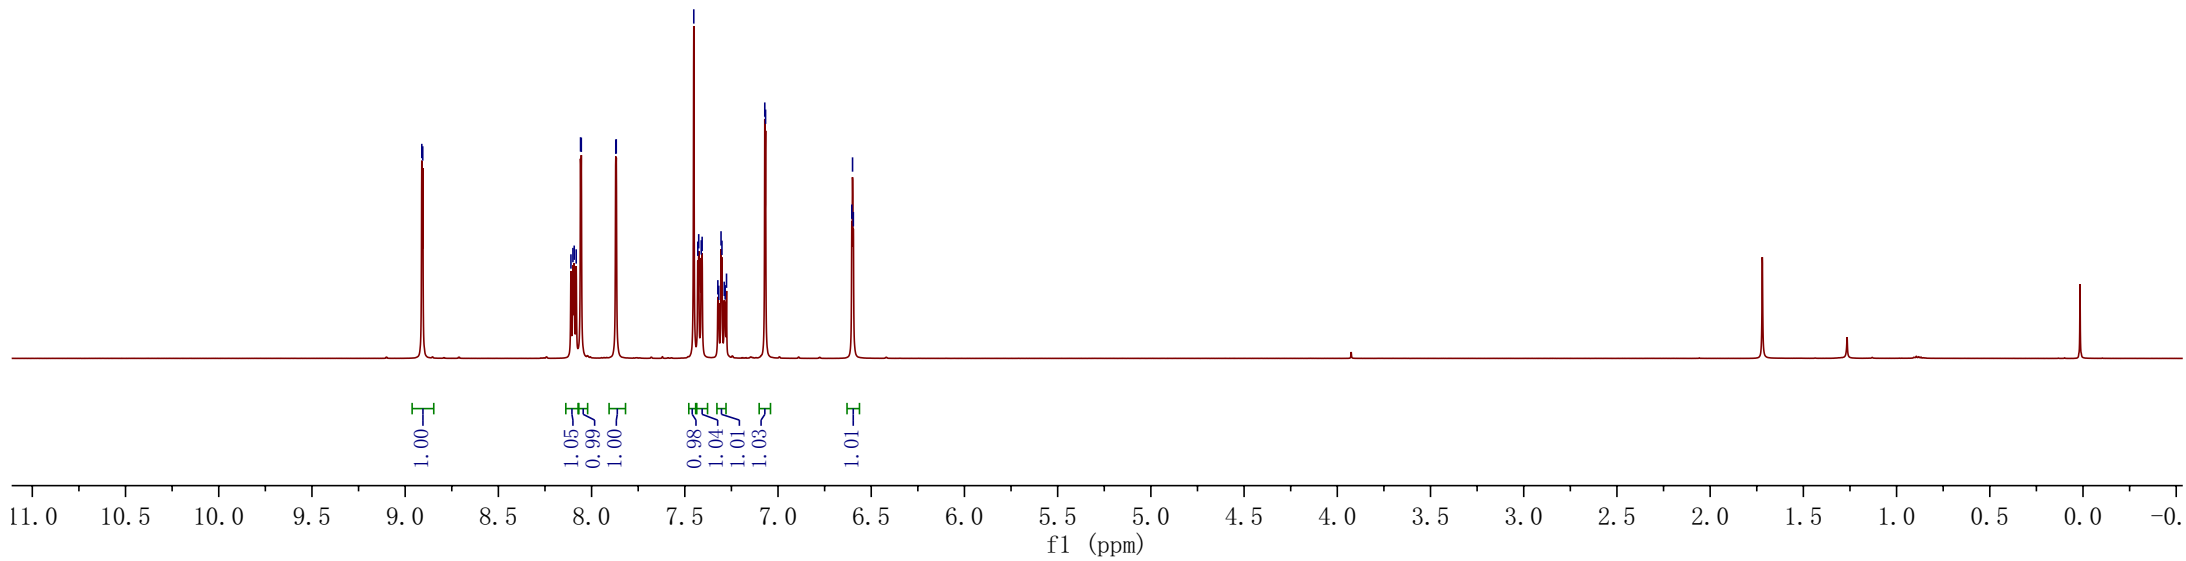

161205  
qk20161128-2 CDC13 1205

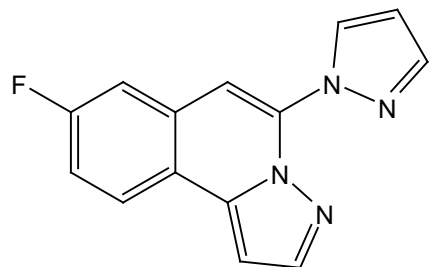

~ 163.2495  
~ 161.2726

~ 141.9491  
~ 141.5375  
~ 140.0192  
~ 134.6562  
~ 132.7268  
~ 130.7823  
~ 130.7075  
~ 125.8453  
~ 125.7722

~ 119.5758  
~ 116.3213  
~ 116.1295  
~ 112.3157  
~ 112.1406  
~ 107.5269  
~ 104.0142  
~ 103.9871  
~ 98.2527

~ 77.2887  
~ 77.0351  
~ 76.7799

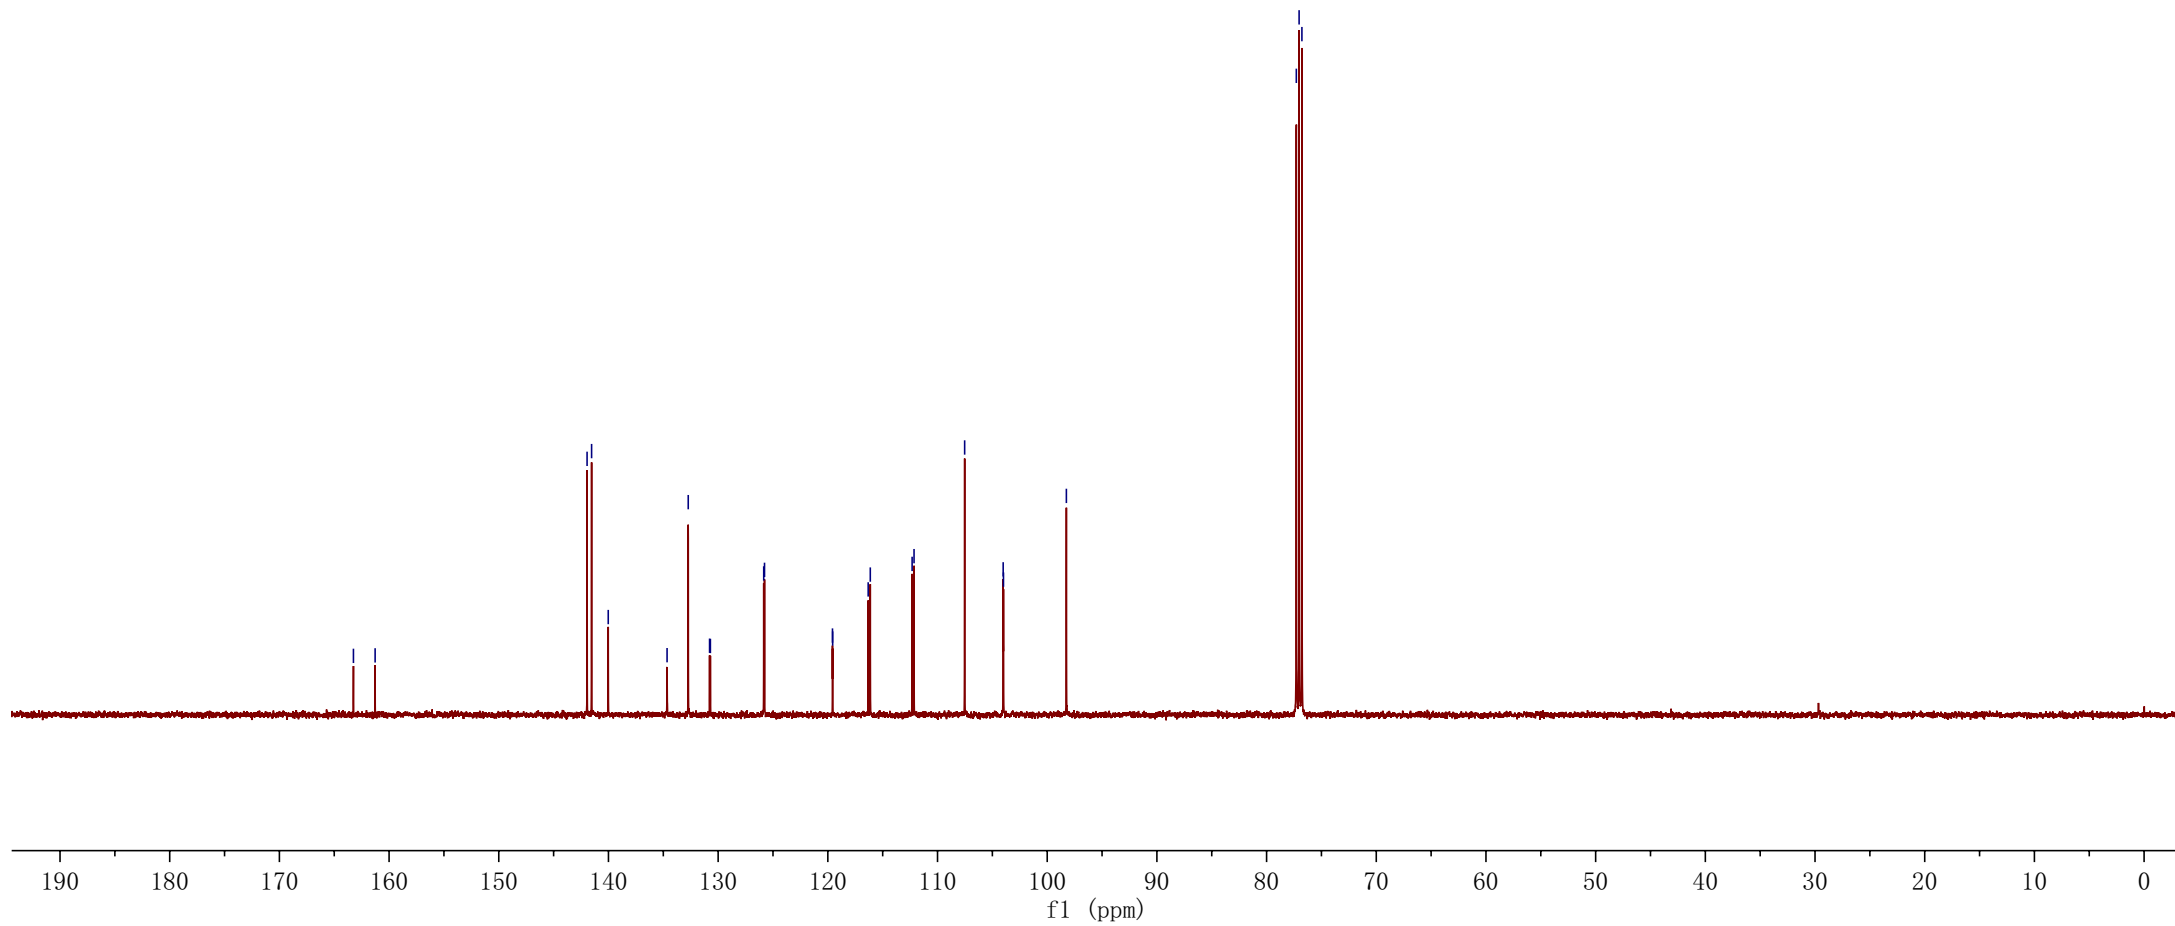

161114  
qk20161108 CDC13 1114

8.9056  
8.0734  
8.0709  
8.0503  
8.0332  
7.7477  
7.7439  
7.5295  
7.5255  
7.5123  
7.5085  
7.4297  
7.2762  
6.6062

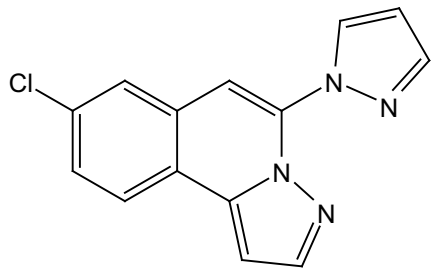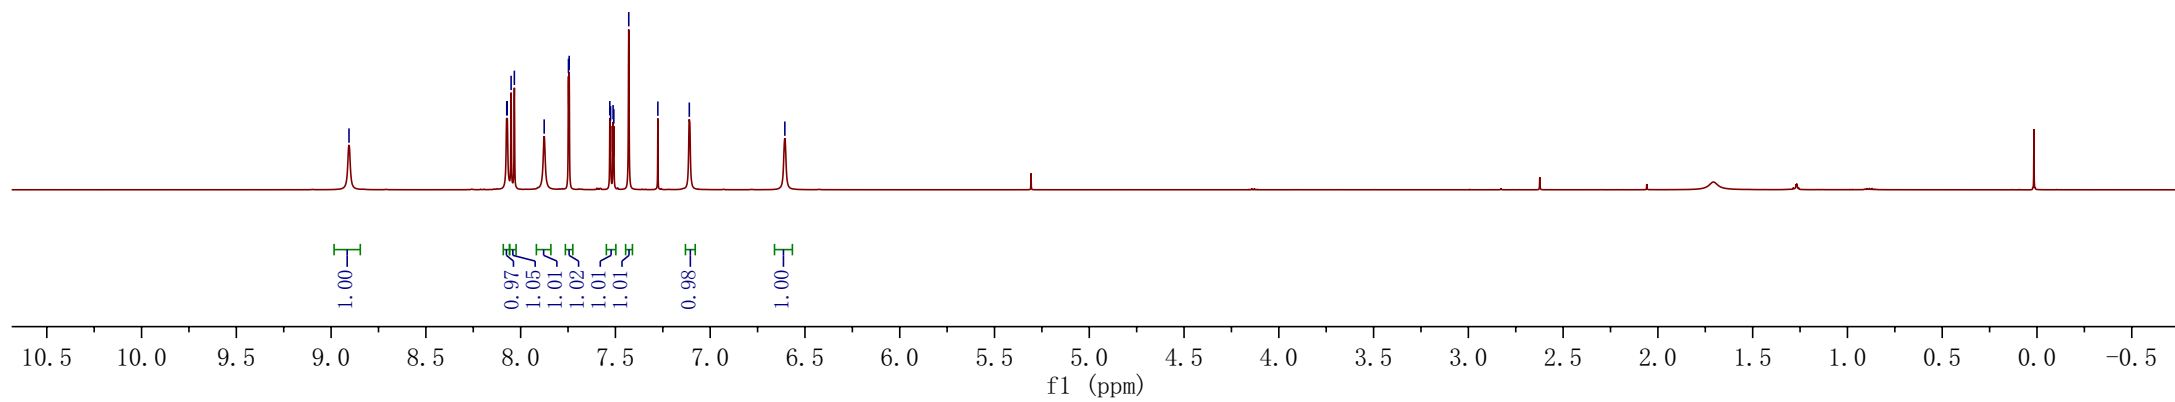

161116  
qk20161108 CDC13 1116

142.0188  
141.5943  
139.8939  
134.6802  
134.2697  
132.7776  
130.2170  
127.9240  
126.5464  
124.9659  
121.2449

107.5931  
103.7014  
98.7841

77.2932  
77.0384  
76.7836

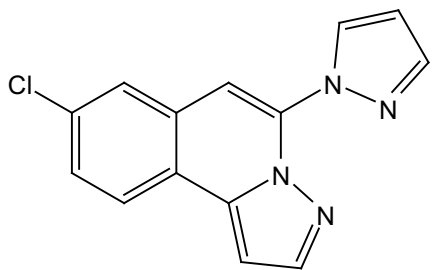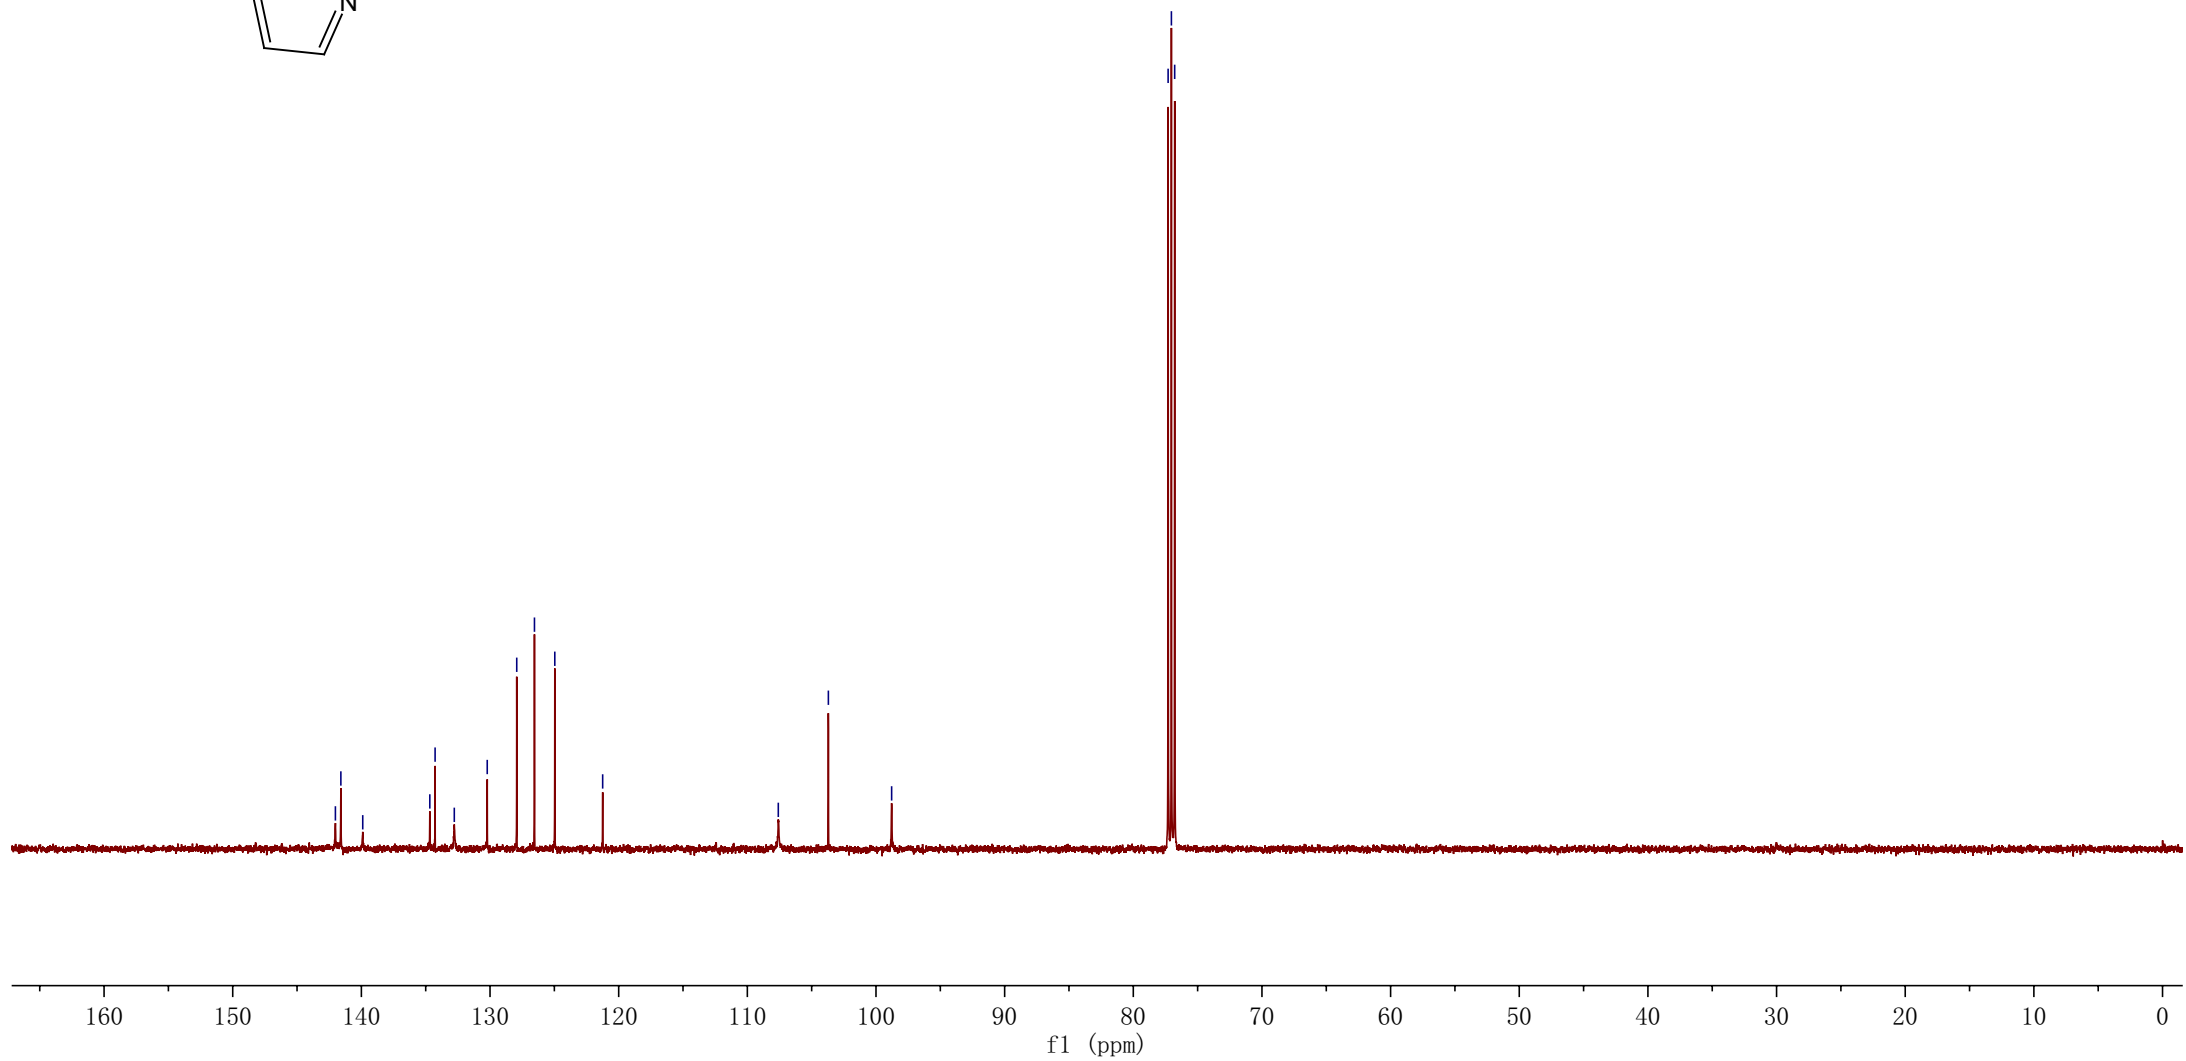

170317  
qk20170314c CDC13 0317

8.9974  
8.9921  
8.7161  
8.7119  
8.4089  
8.4046  
8.3912  
8.3869  
8.2981  
8.2804  
8.1895  
8.1852  
7.9114  
7.9087  
7.6957  
7.3248  
7.3206  
7.2763  
6.6453  
6.6413  
6.6367

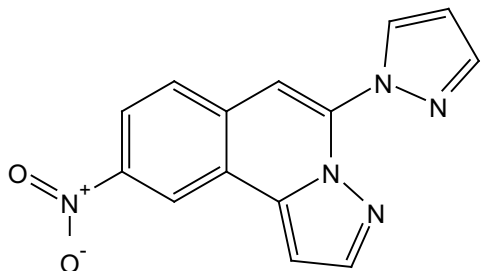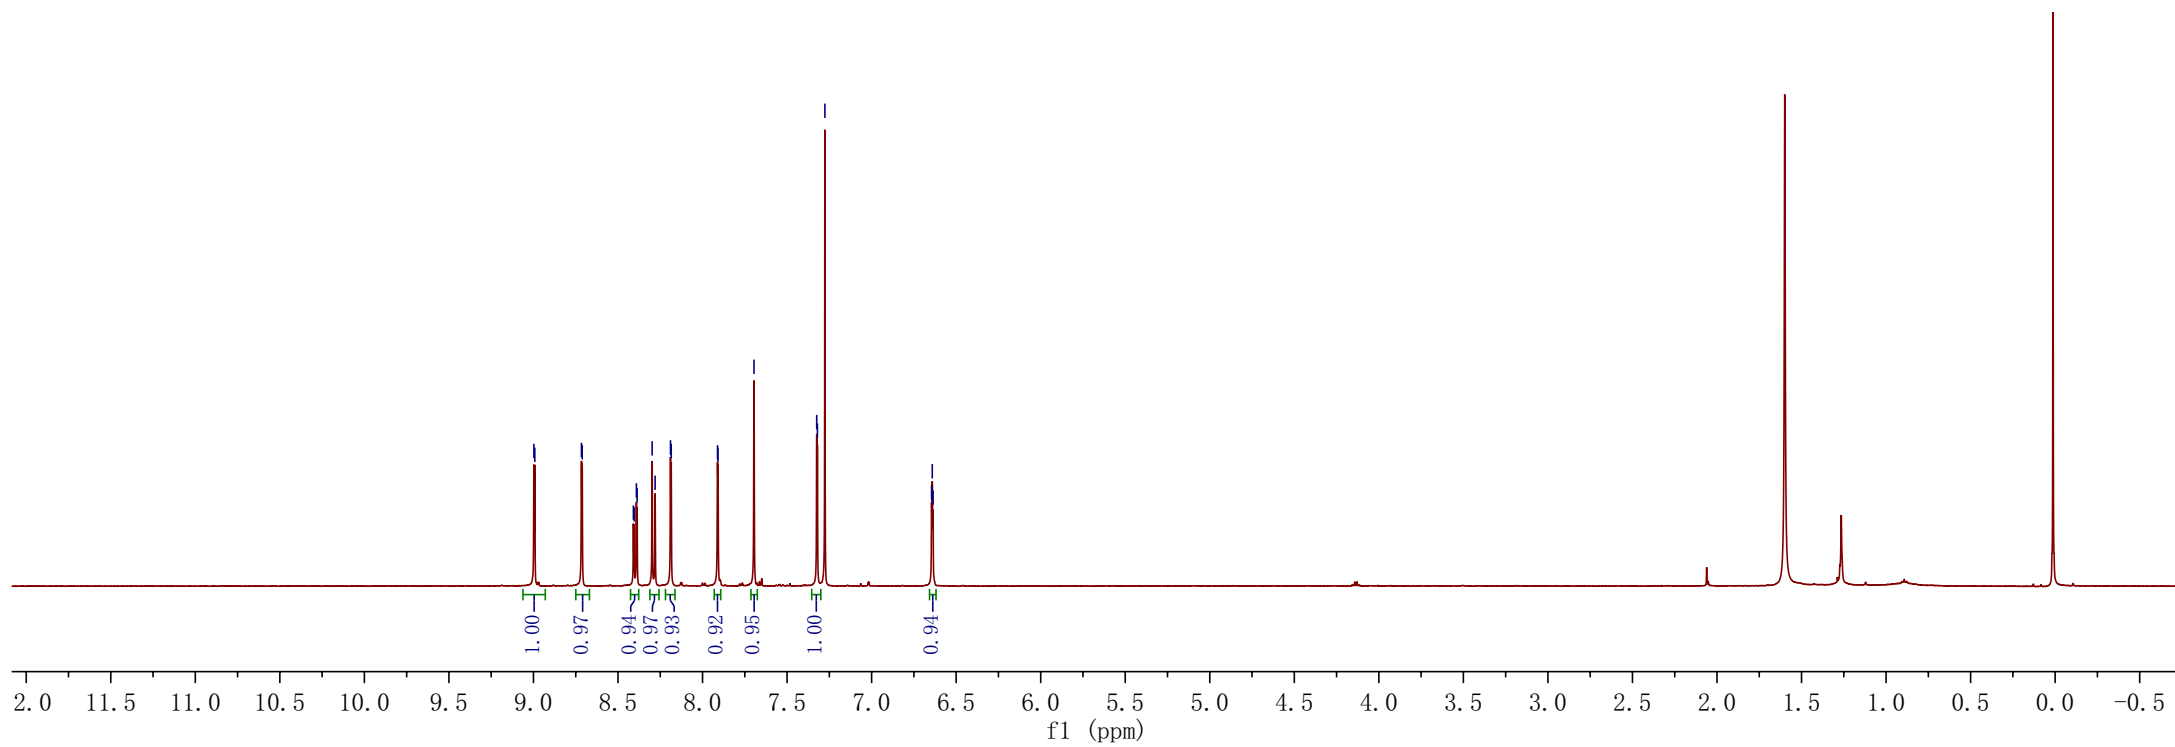



170321

qk20170314c

CDC13

0321

142.46  
142.04  
139.29  
135.55  
132.88  
129.16  
126.54  
124.84  
123.09  
121.47  
118.82

107.96  
103.96  
100.89

77.29  
77.03  
76.78

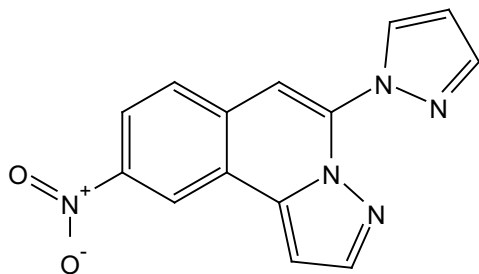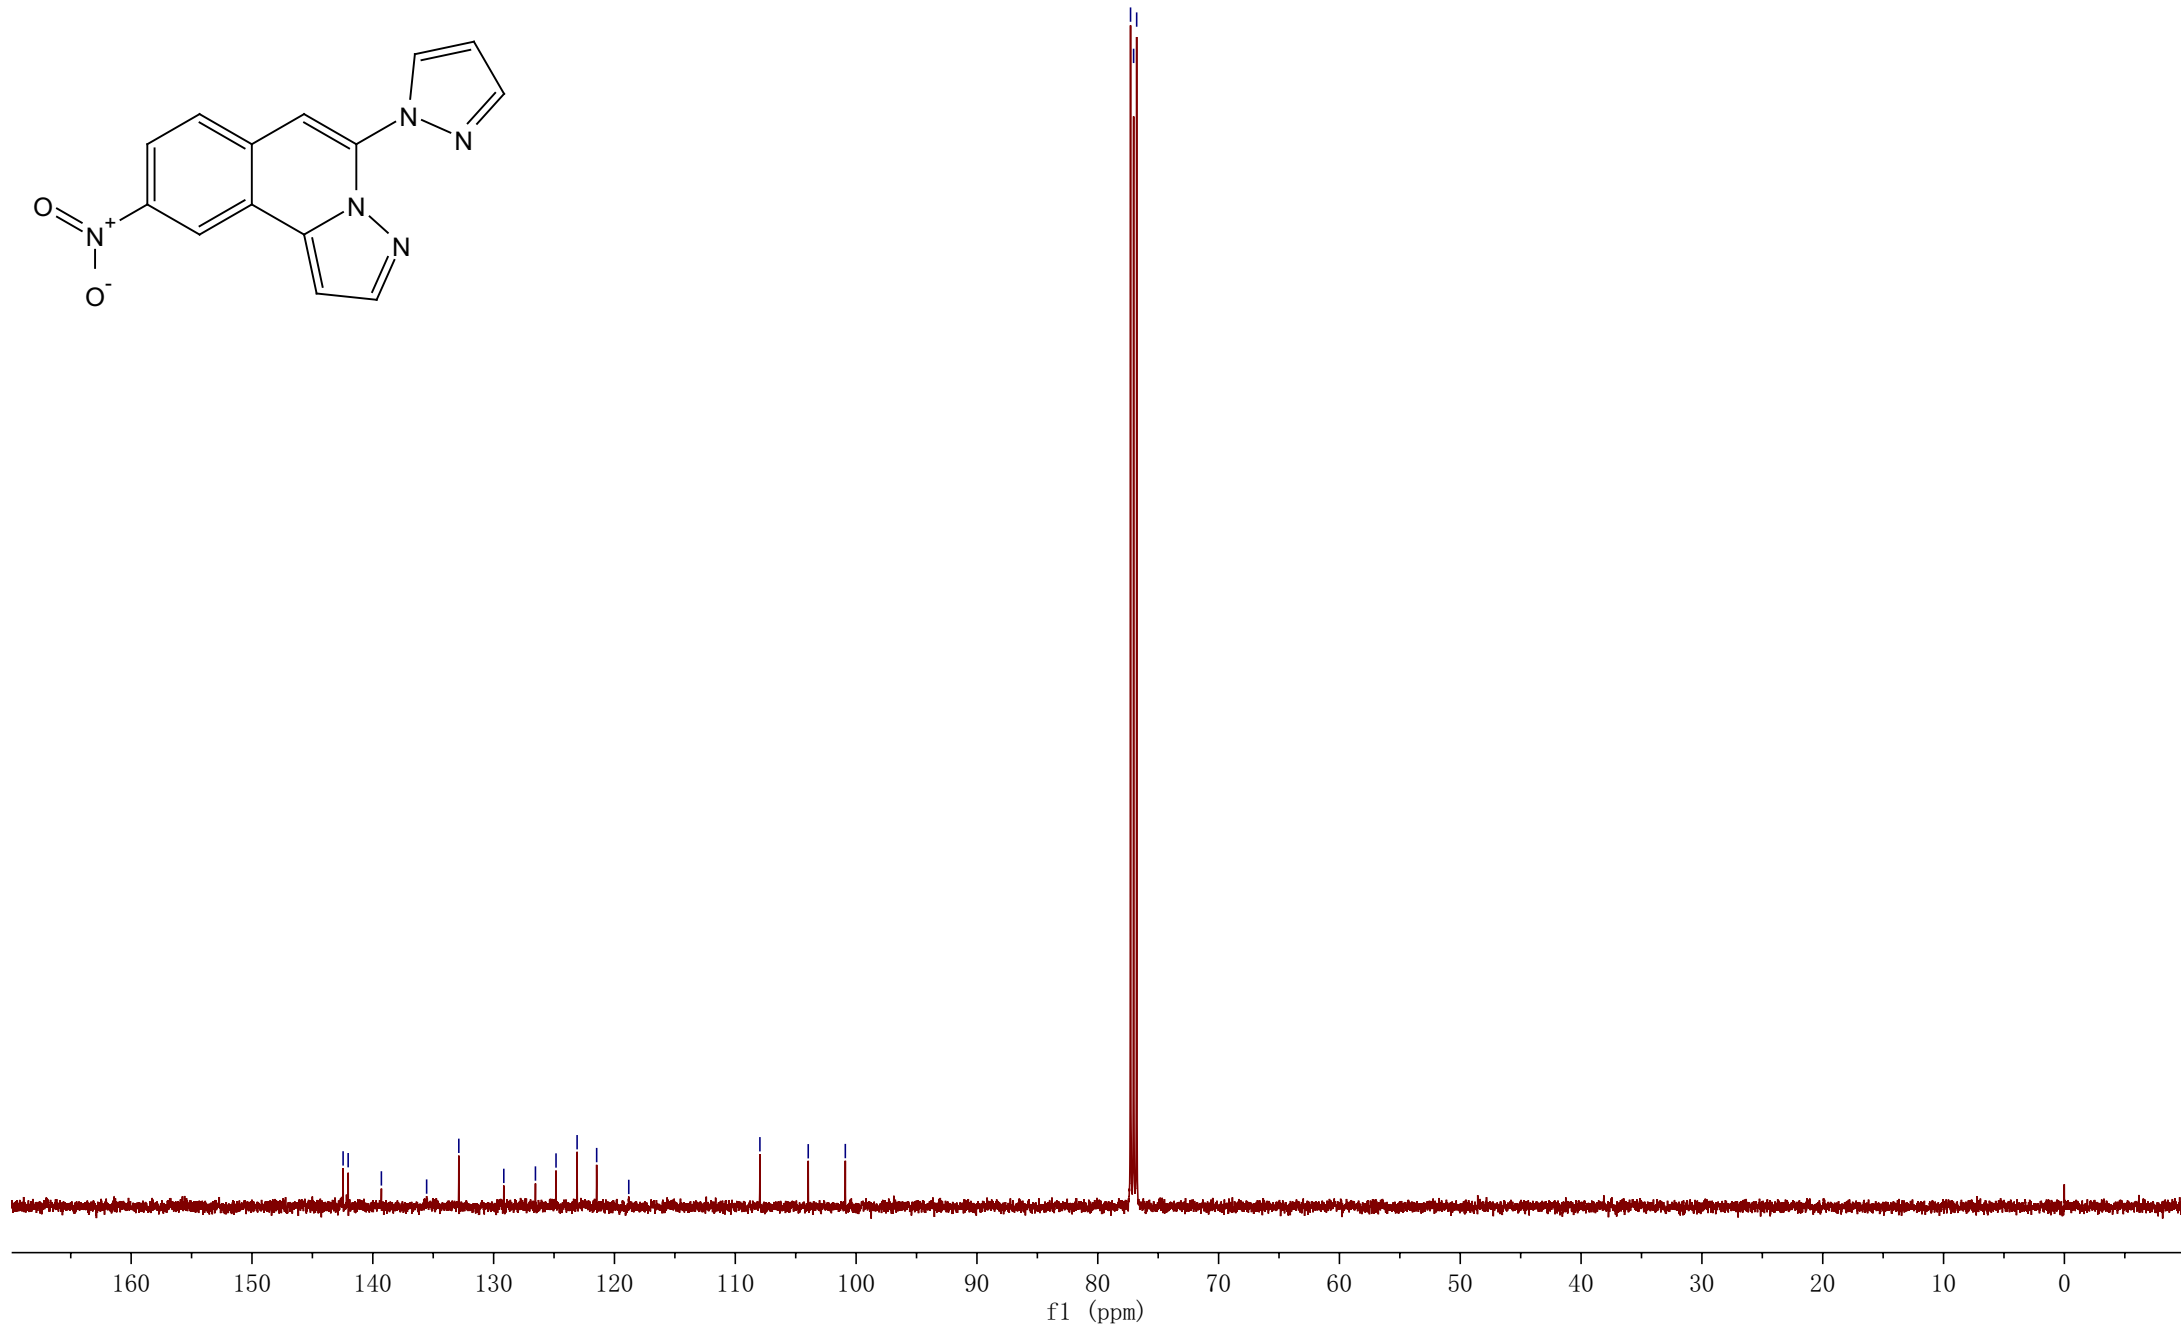

170317  
qk20170314b CDC13 0317

8.5282  
8.1998  
8.1822  
7.8338  
7.6590  
7.2903  
7.2770  
7.1993  
7.1941  
7.1817  
7.1764  
7.1624  
7.1573

3.9285

2.6308

2.2328

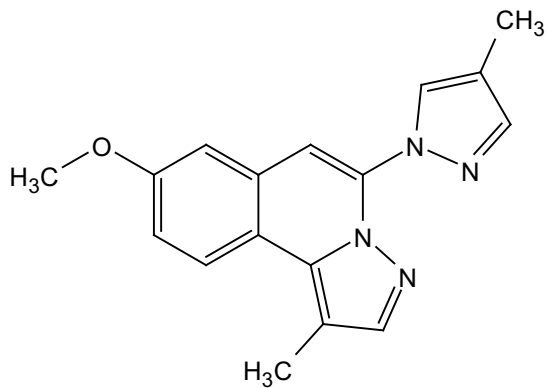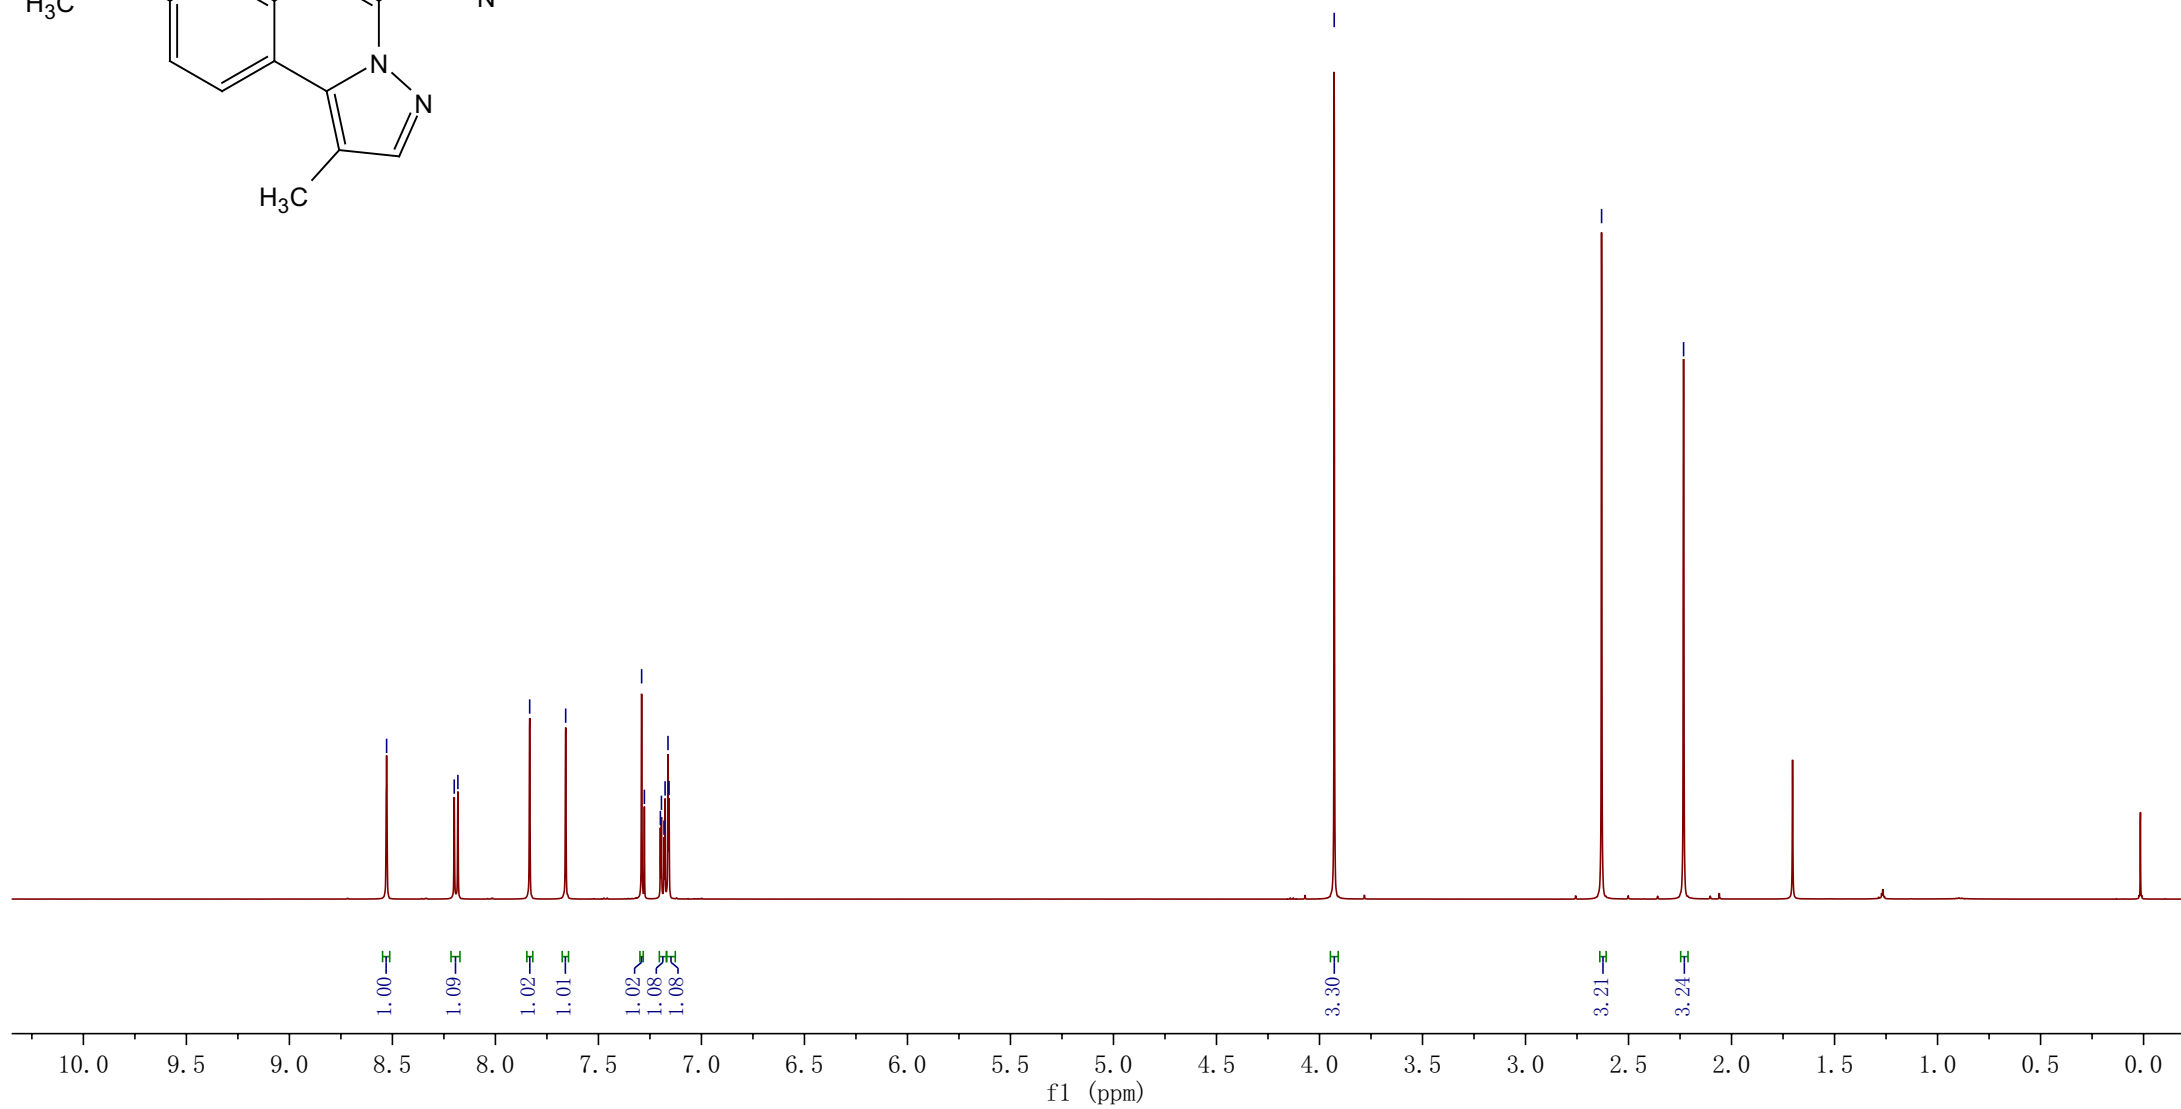

170321  
qk20170314b CDC13 0321

—158.84  
~142.62  
~142.50  
~136.38  
~134.37  
~131.05  
~130.84  
~124.68  
~118.67  
~117.75  
~116.64  
~109.20  
~108.59  
~104.24  
~77.29  
~77.03  
~76.78  
—55.40  
~11.61  
~9.08

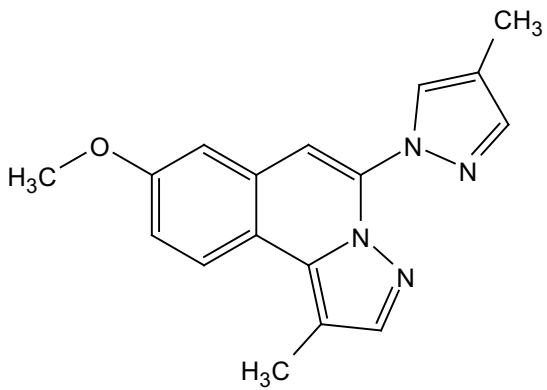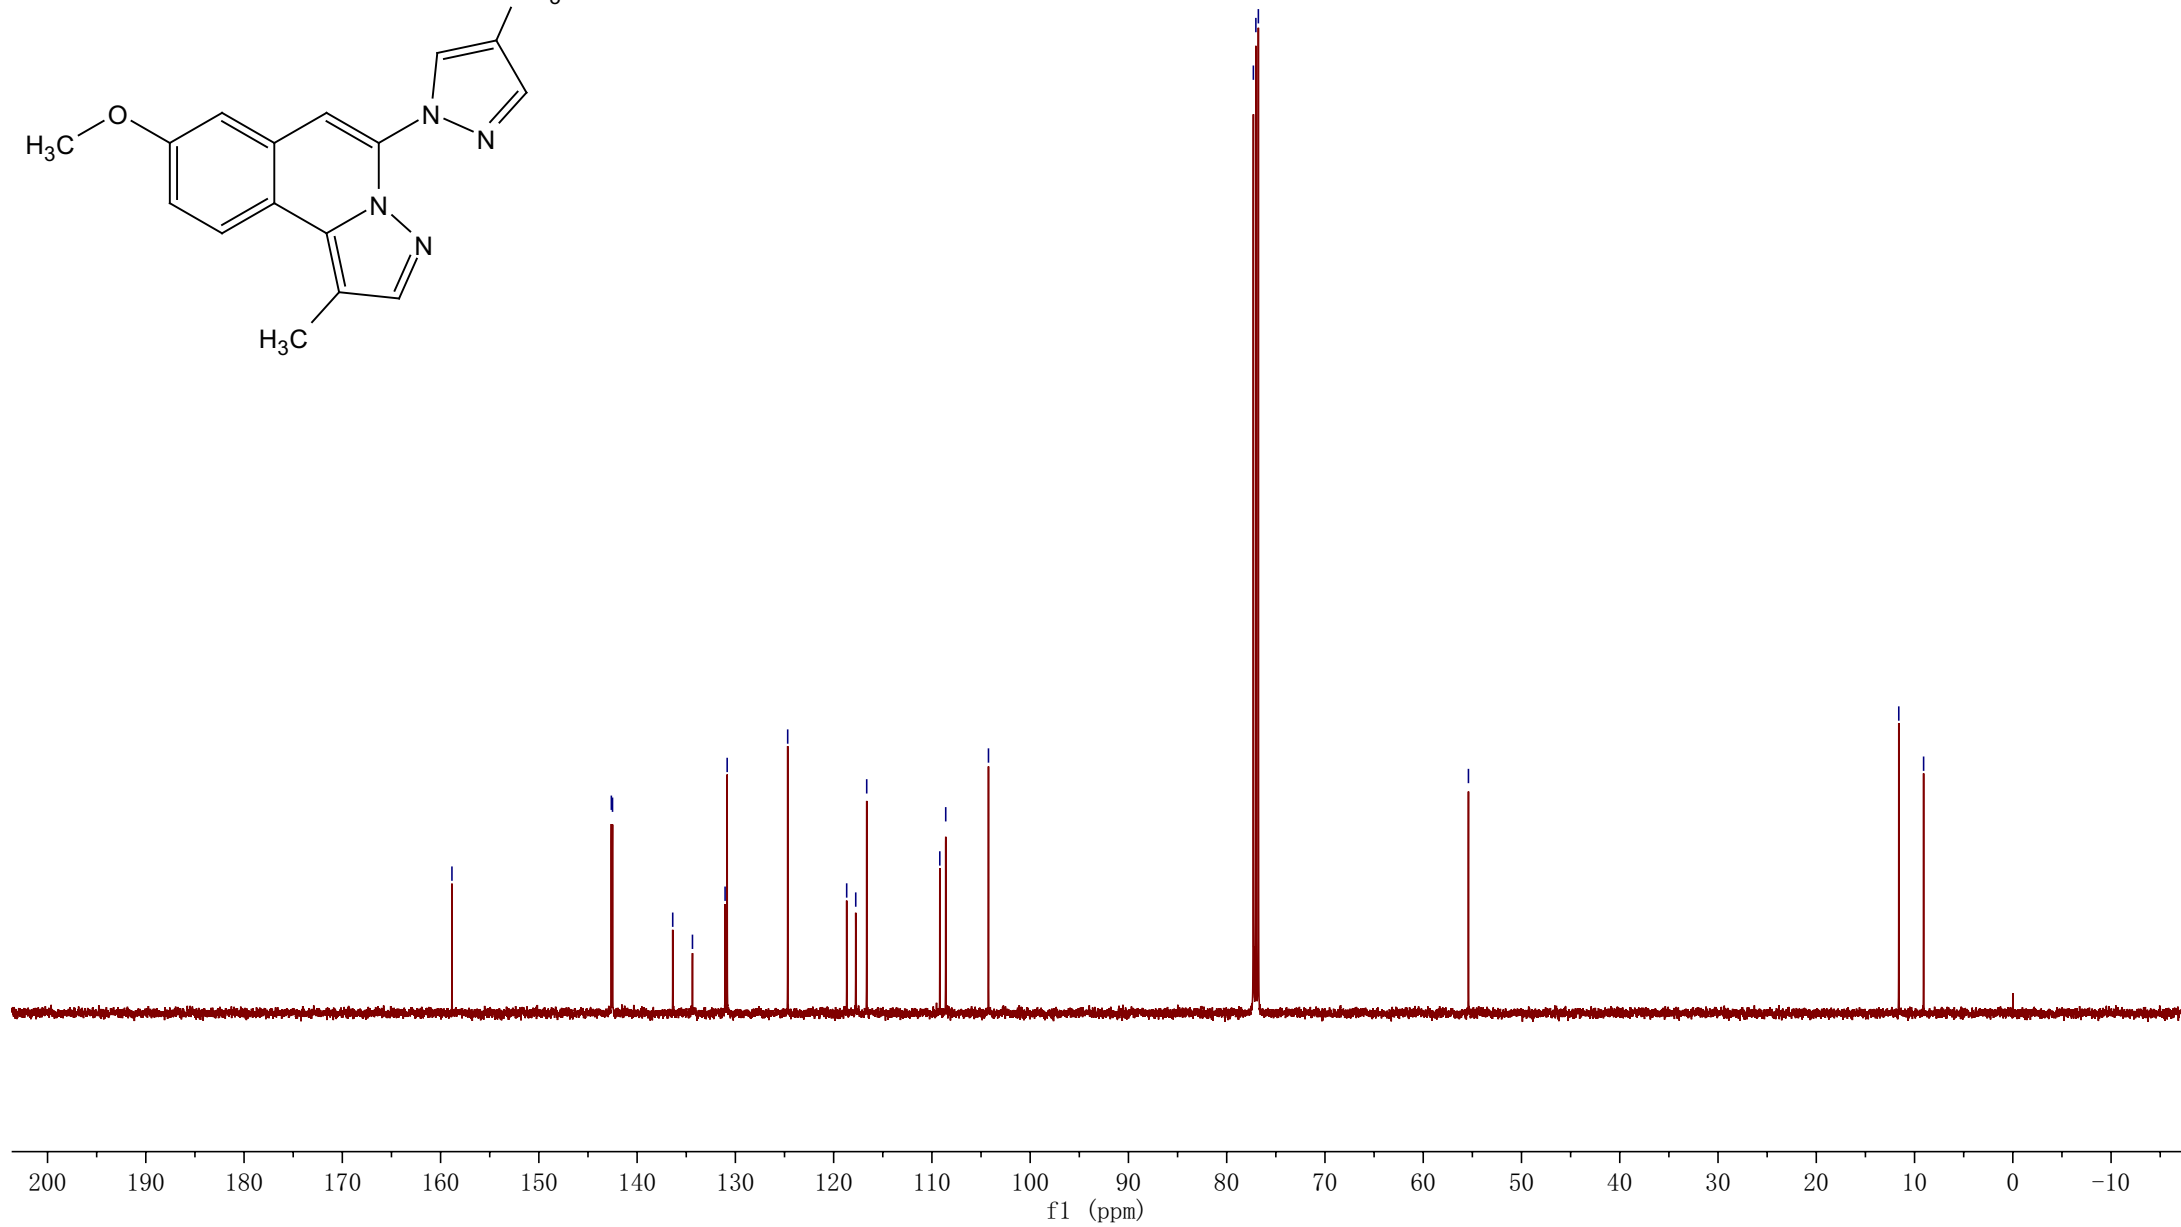

8.5667  
8.1987  
8.1915  
8.1809  
8.1447  
7.6570  
7.3795  
7.3744  
7.3610  
7.3559  
7.2869  
7.2799  
7.2698  
7.2646  
7.2524  
7.2472

2.6060  
2.2245

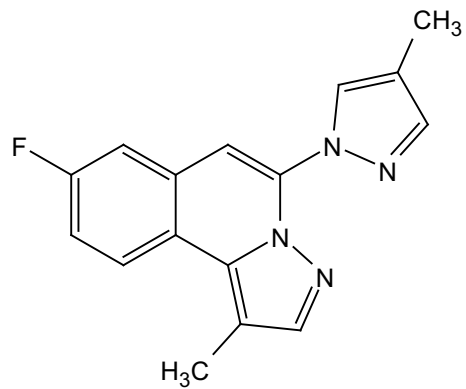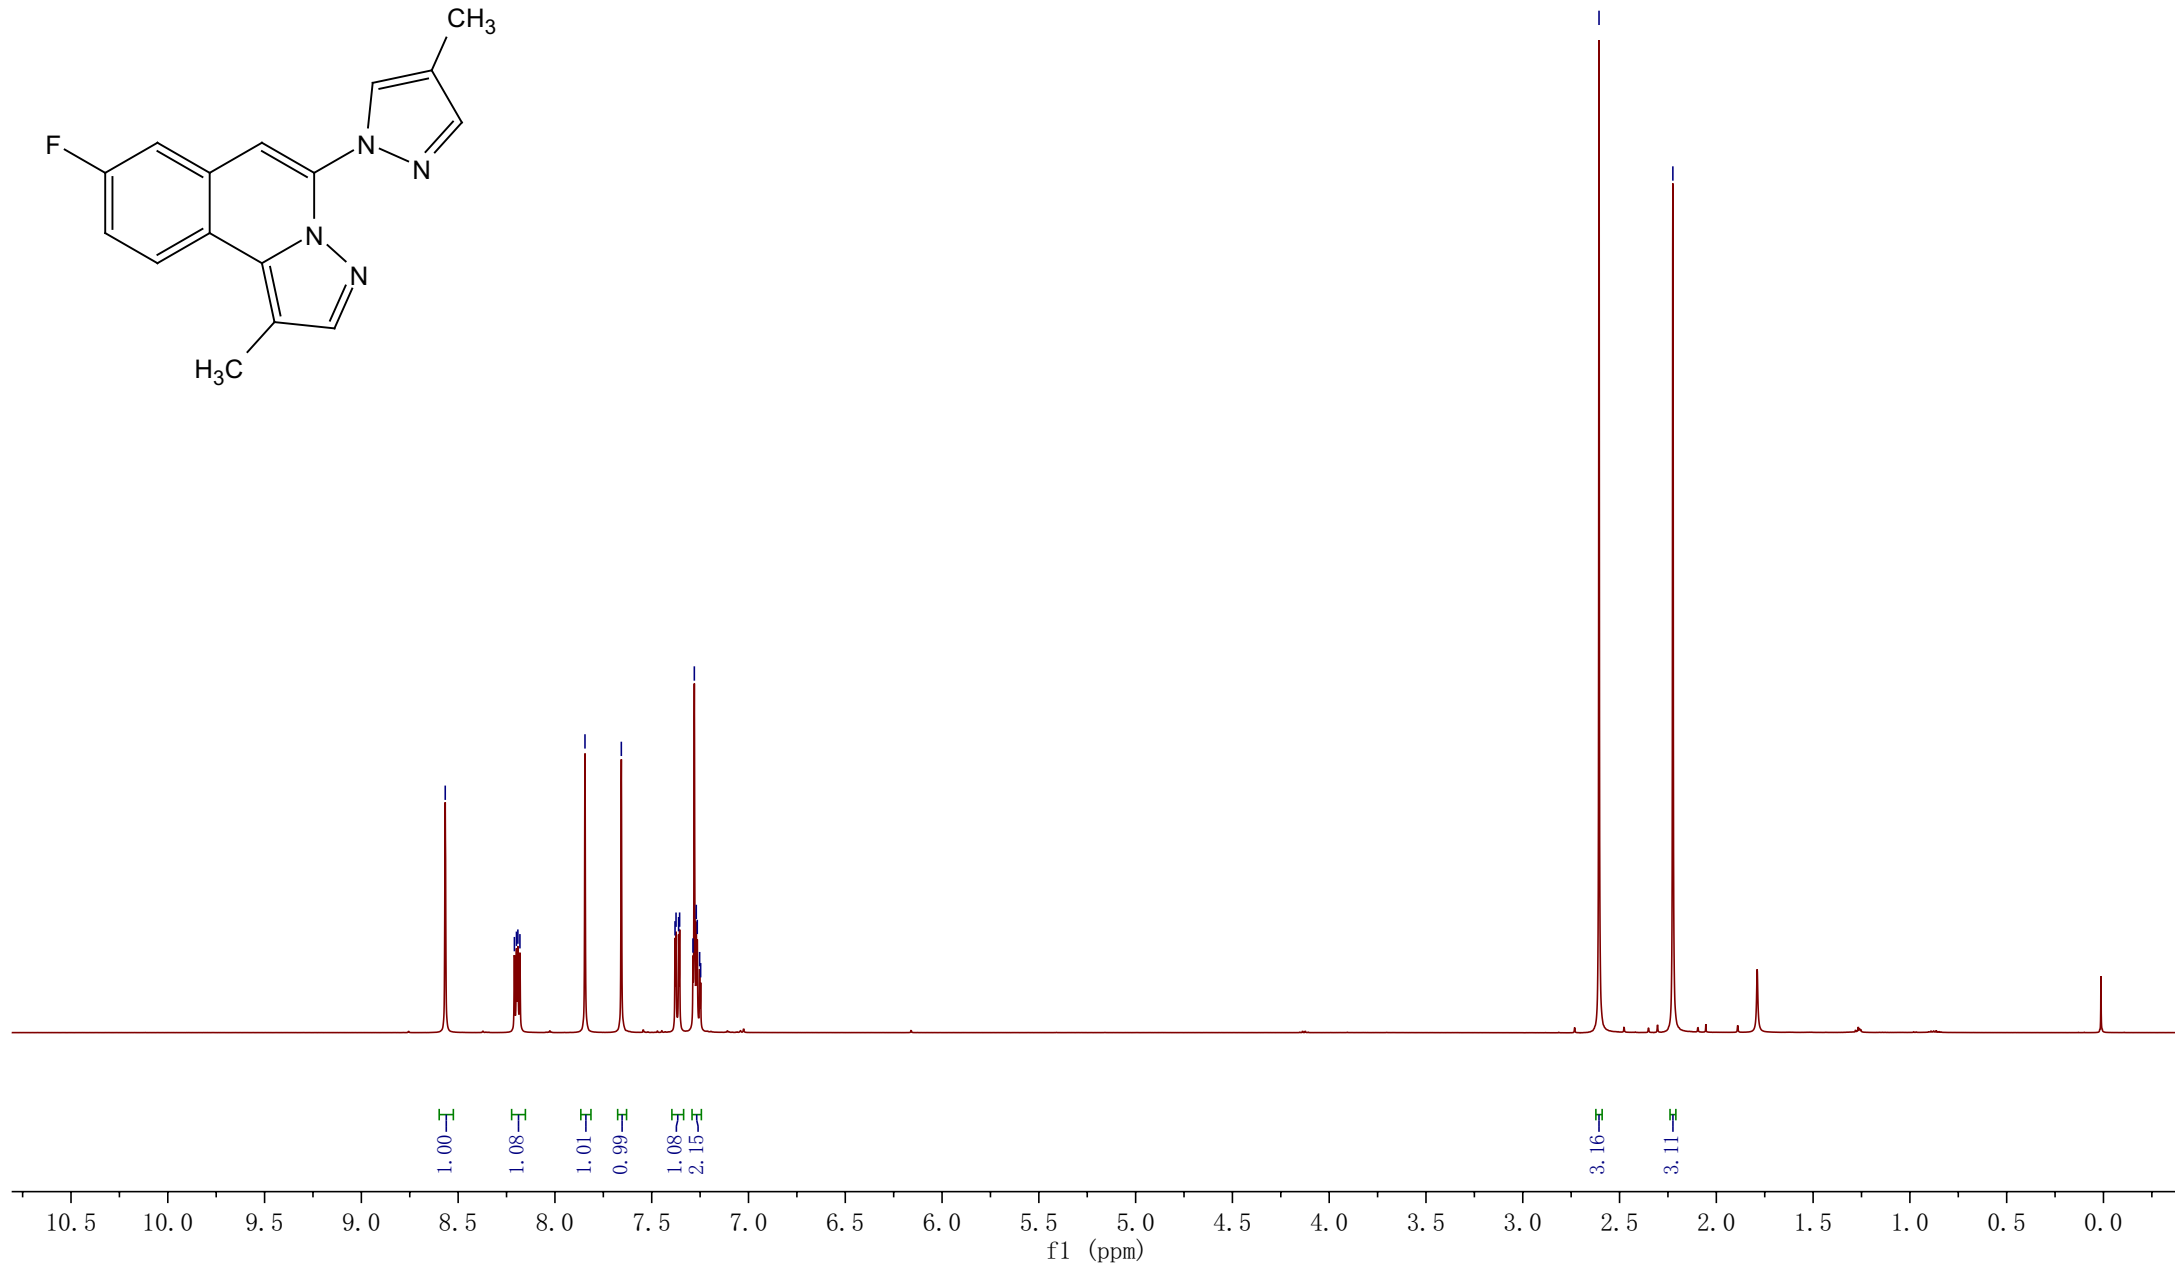

170321  
qk20170314a CDC13 0321

162.55  
160.58

142.85  
142.61

135.85  
134.77  
131.22  
130.87

125.18  
117.92  
115.55  
115.36  
112.23  
112.06  
109.28  
103.25

77.29  
77.03  
76.78

11.58  
9.02

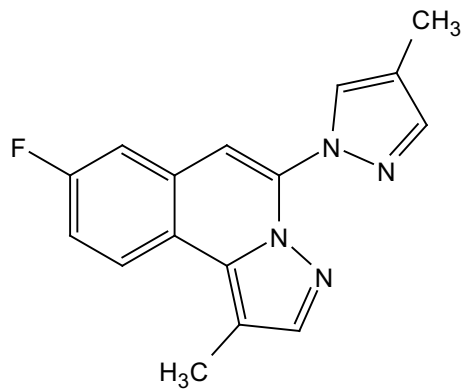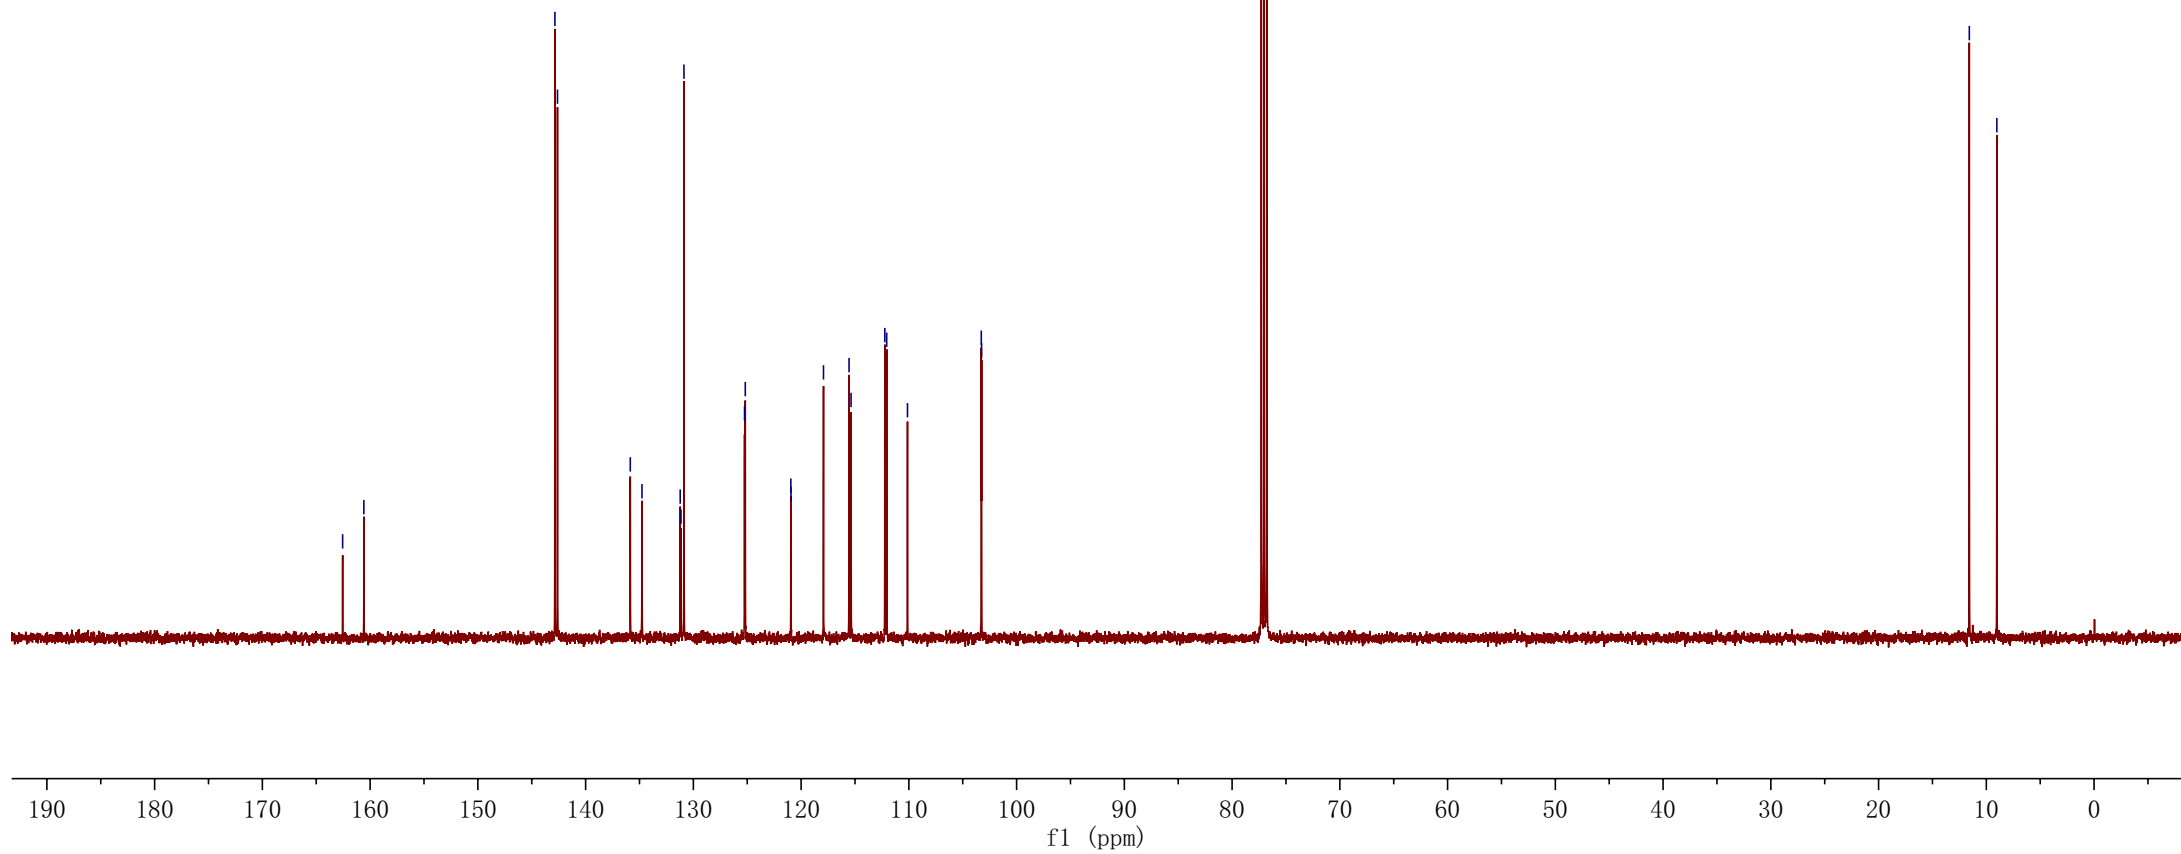

161212  
qk20161207a CDC13 1212

8.5595  
8.1885  
8.1712  
7.8776  
7.7210  
7.7168  
7.6677  
7.5222  
7.5178  
7.5048  
7.5004  
7.2804  
7.2769

2.6422

2.2333

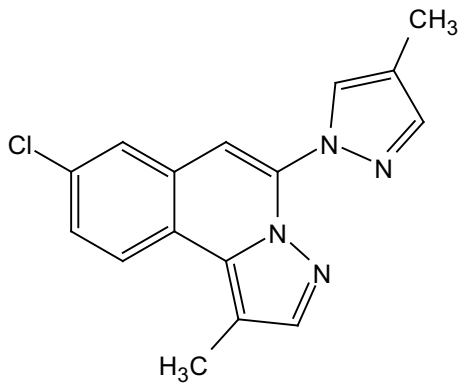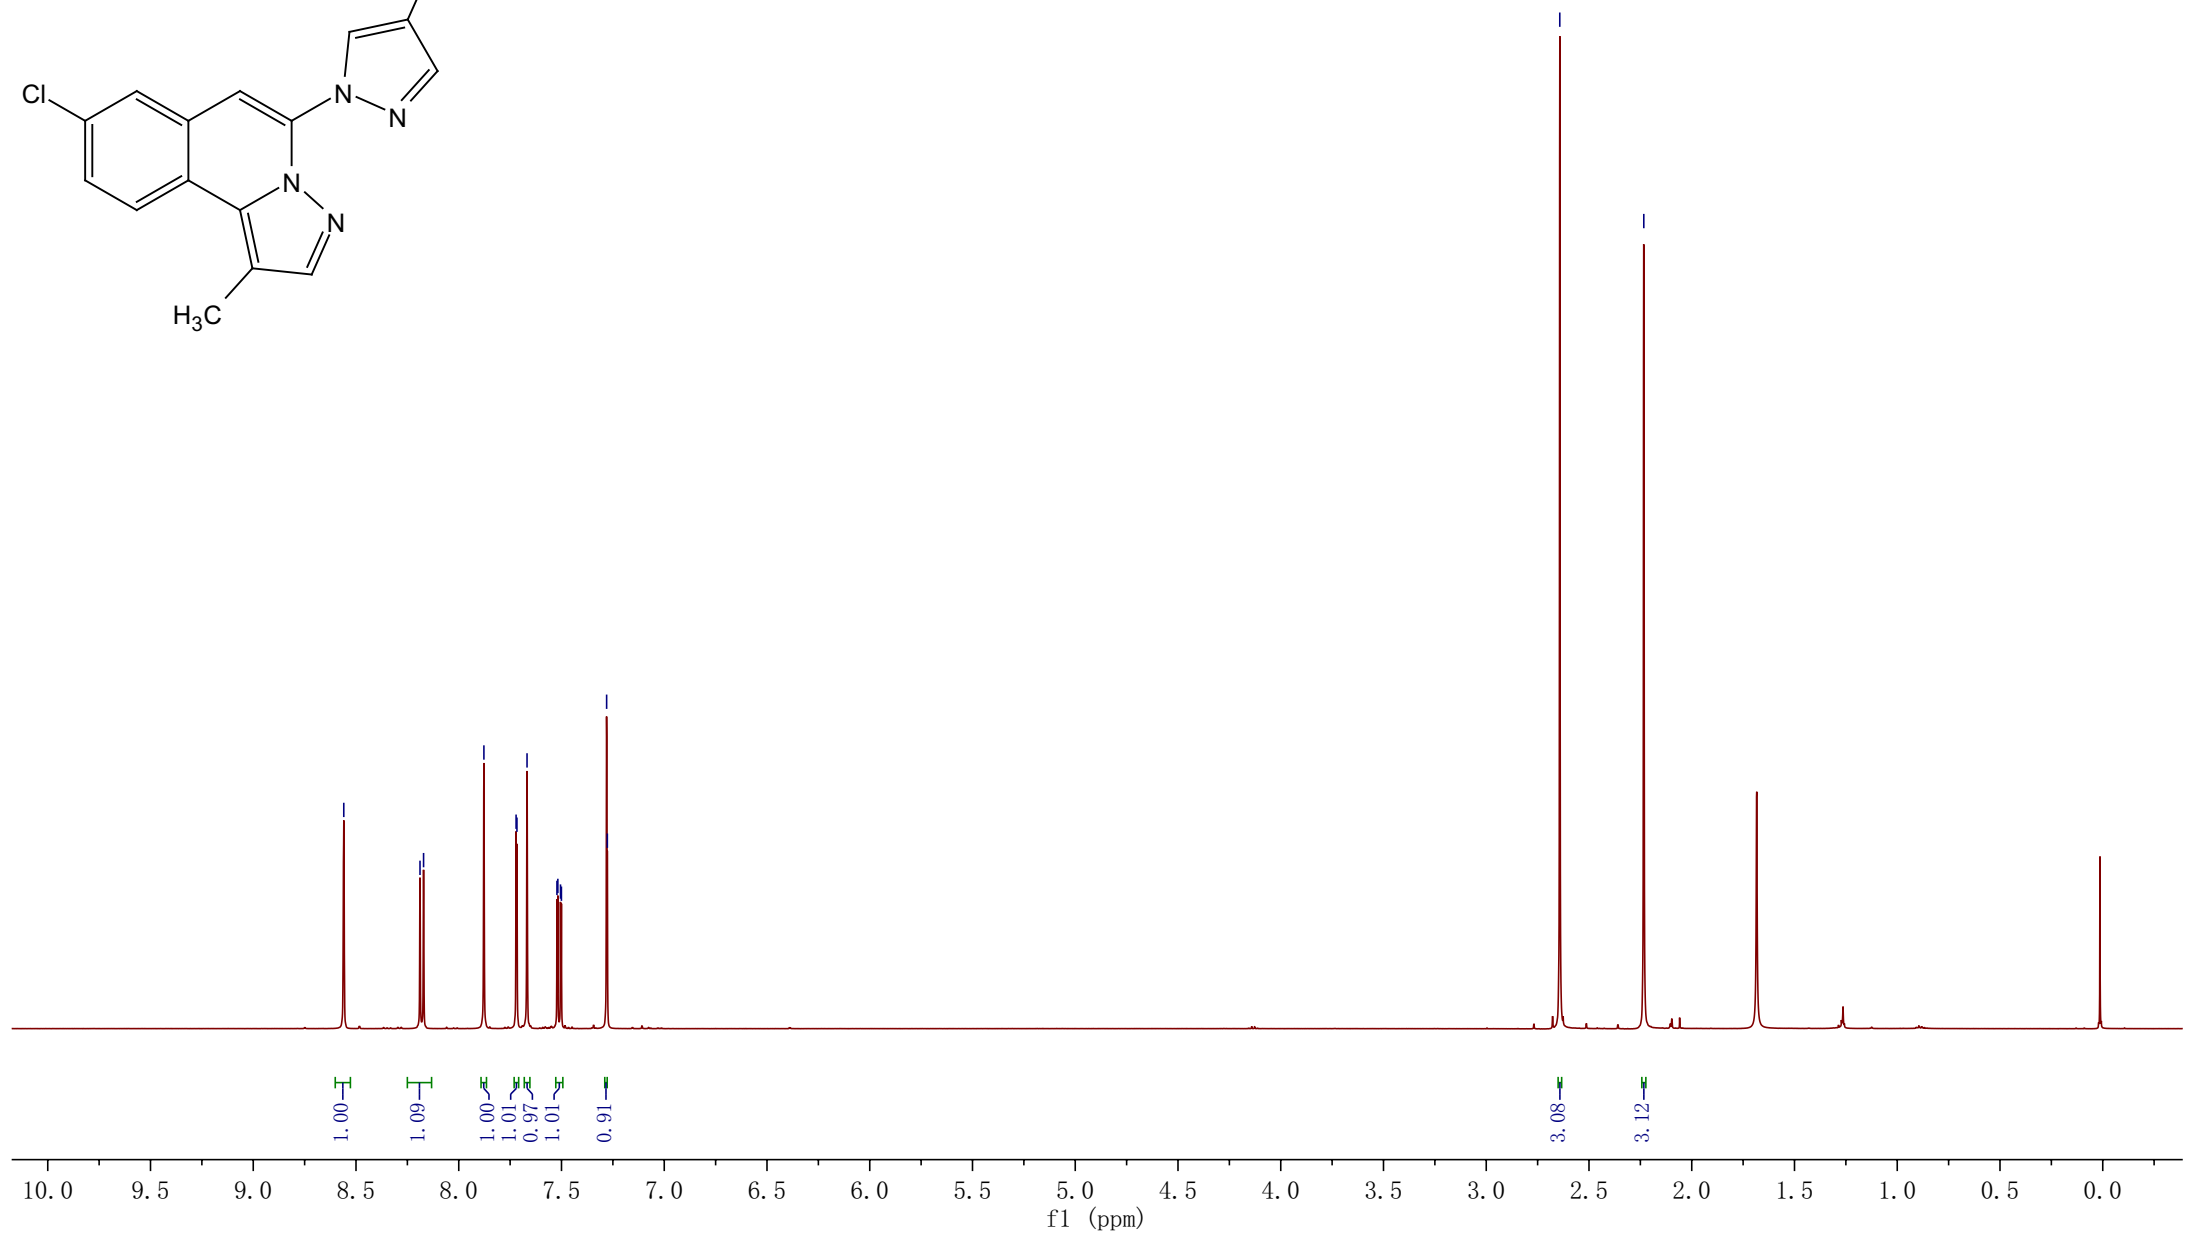

161214  
qk20161207a CDC13 1214

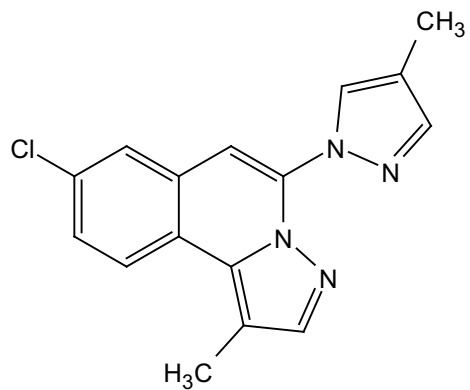

142.9561  
142.7267  
135.7744  
134.8372  
133.3782  
130.8875  
130.6596  
127.4196  
126.4463  
124.4884  
122.6837  
118.0263  
110.8698  
103.1525

77.2937  
77.0387  
76.7842

11.6819  
9.0807

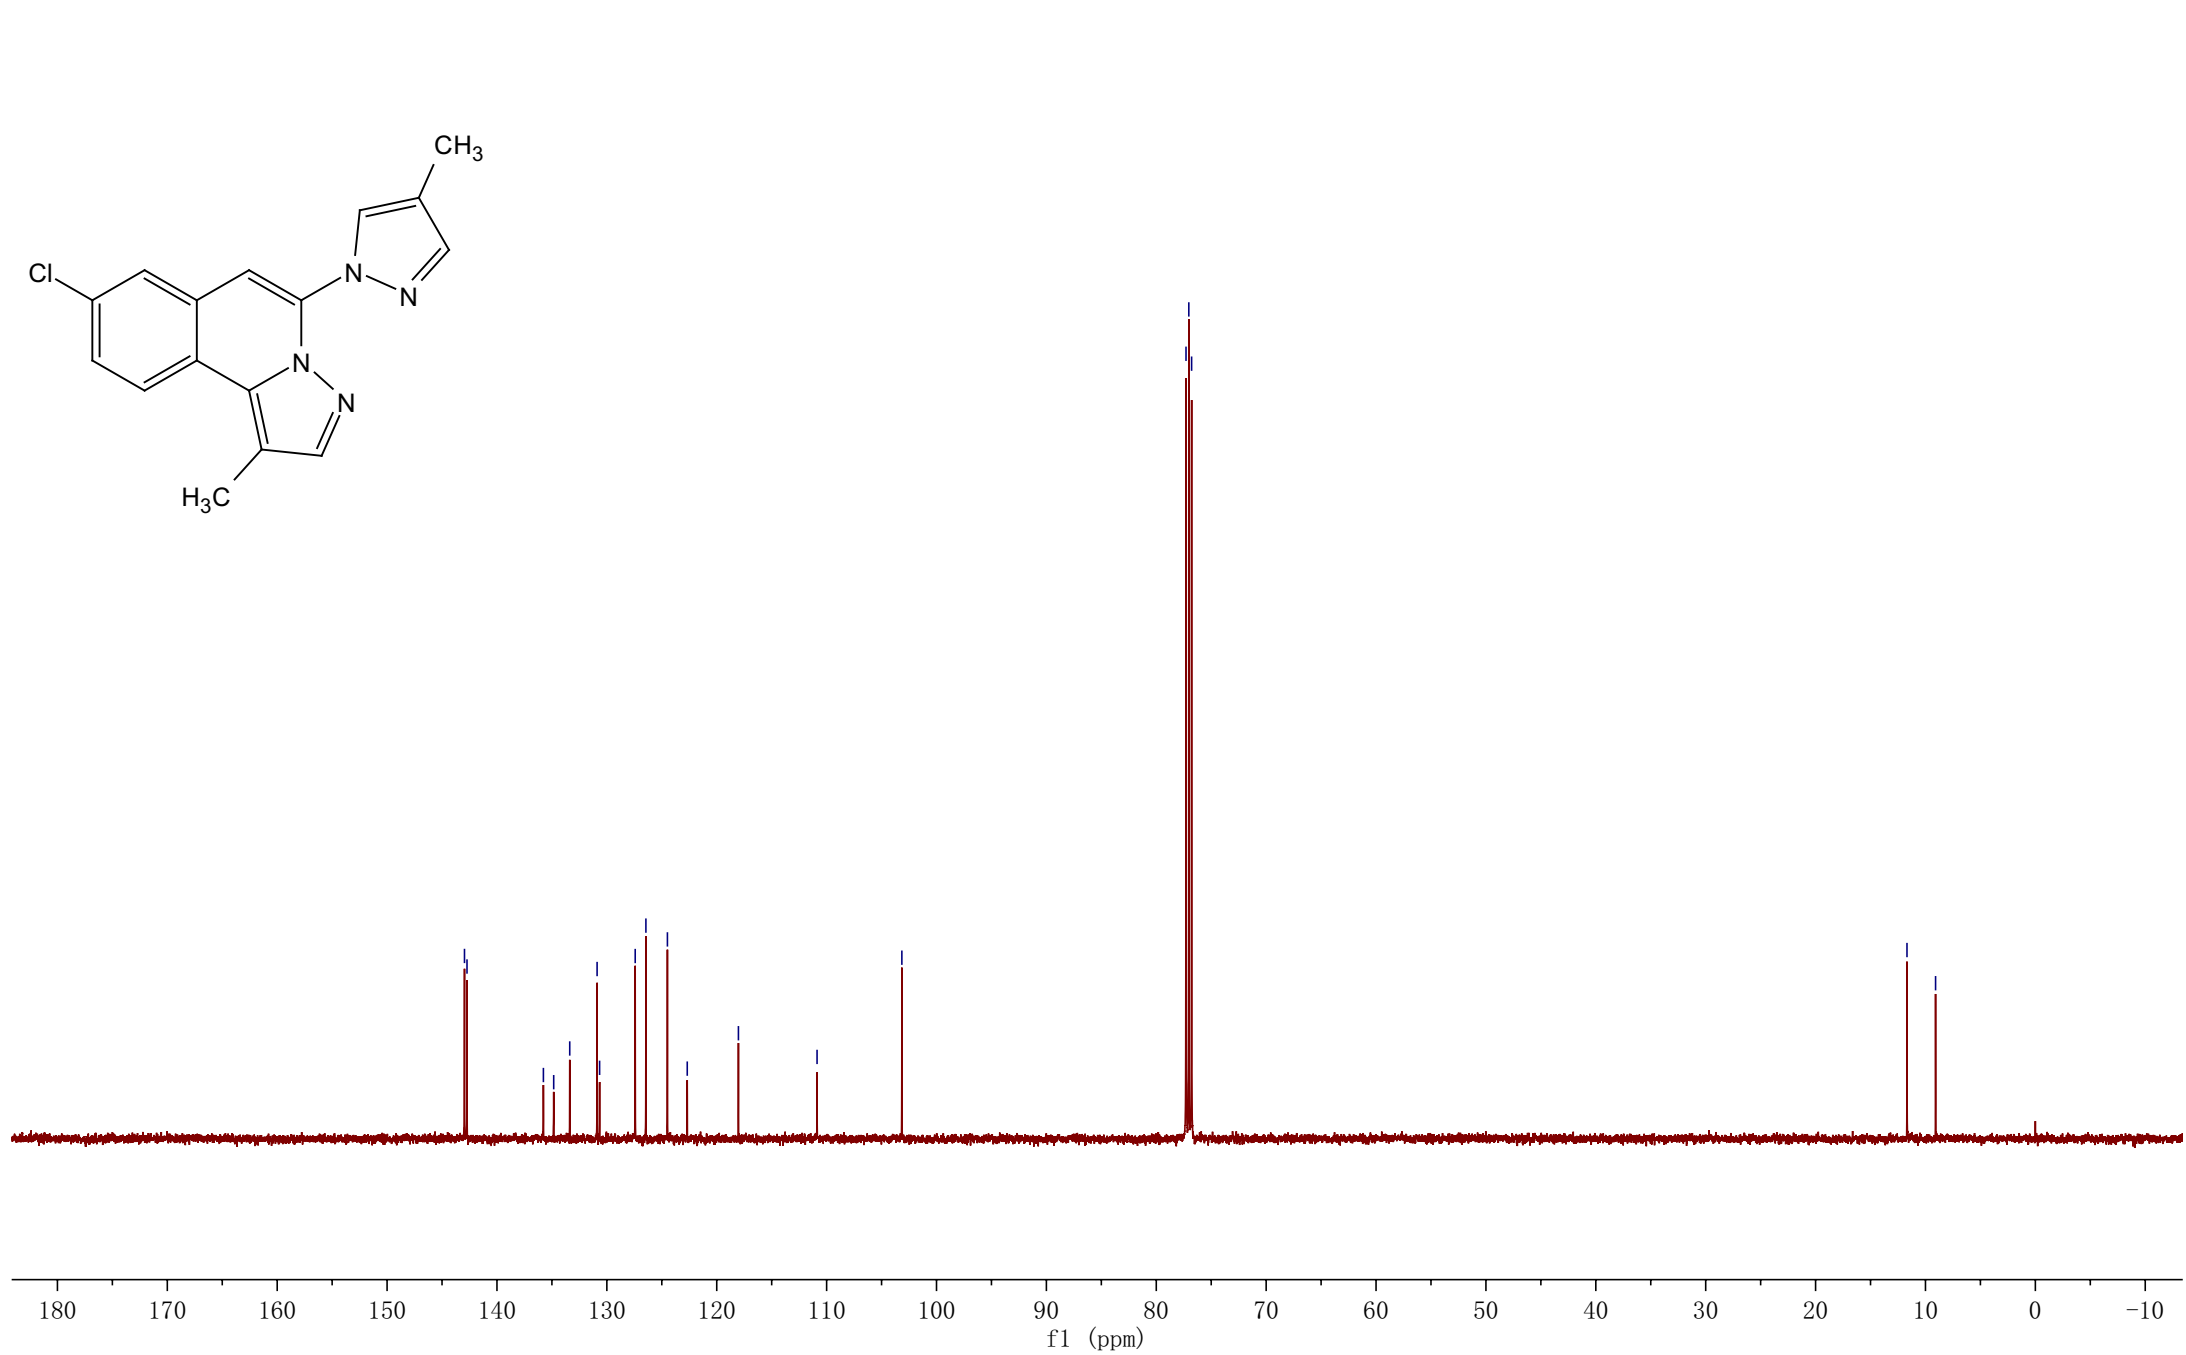

Supplement: c9nj01882d1.pdf [file c9nj01882d1.pdf]
